# Supplementary material for: Effects of different plantation years on grassland plant community in Maxian Mountain area of the Loess Plateau
Source: Front Plant Sci. 2023 Feb 14;14:1123471. doi: 10.3389/fpls.2023.1123471 (PMC9974166; doi:10.3389/fpls.2023.1123471)
Supplement: Supplementary file 1 [file Table_1.xls]

## Sheet: Plots
Plot No	Artificial afforestation（year）	repeat	handle	Geographic coordinates	Aspect	Altitude（m）
1	CK	1	CK-1-1	104°4′5″E 35°38′48″N	North	2790
1	CK	2	CK-1-2	104°4′5″E 35°38′48″N	North	2790
1	CK	3	CK-1-3	104°4′5″E 35°38′48″N	North	2790
2	CK	1	CK-2-1	104°5′11″E 35°38′26″N	Northwest	2719
2	CK	2	CK-2-2	104°5′11″E 35°38′26″N	Northwest	2719
2	CK	3	CK-2-3	104°5′11″E 35°38′26″N	Northwest	2719
3	CK	1	CK-3-1	103°52′19″E 35°46′1″N	North	2632
3	CK	2	CK-3-2	103°52′19″E 35°46′1″N	North	2632
3	CK	3	CK-3-3	103°52′19″E 35°46′1″N	North	2632
4	10	1	10-1-1	103°59′58″ E 35°40′17″N	North	2775
4	10	2	10-1-2	103°59′58″ E 35°40′17″N	North	2775
4	10	3	10-1-3	103°59′58″ E 35°40′17″N	North	2775
5	10	1	10-2-1	104°6′6″ E 35°37′16″N	Northwest	2628
5	10	2	10-2-2	104°6′6″ E 35°37′16″N	Northwest	2628
5	10	3	10-2-3	104°6′6″ E 35°37′16″N	Northwest	2628
6	10	1	10-3-1	104°4′14″E 35°38′48″N	Northwest	2776
6	10	2	10-3-2	104°4′14″E 35°38′48″N	Northwest	2776
6	10	3	10-3-3	104°4′14″E 35°38′48″N	Northwest	2776
7	8	1	8-1-1	103°52′9″E 35°44′31″N	Northeast	2738
7	8	2	8-1-2	103°52′9″E 35°44′31″N	Northeast	2738
7	8	3	8-1-3	103°52′9″E 35°44′31″N	Northeast	2738
8	8	1	8-2-1	104°6′20″E 35°36′43″N	North	2584
8	8	2	8-2-2	104°6′20″E 35°36′43″N	North	2584
8	8	3	8-2-3	104°6′20″E 35°36′43″N	North	2584
9	8	1	8-3-1	104°4′28″E 35°38′32″N	Northeast	2766
9	8	2	8-3-2	104°4′28″E 35°38′32″N	Northeast	2766
9	8	3	8-3-3	104°4′28″E 35°38′32″N	Northeast	2766
10	6	1	6-1-1	104°6′22″E 35°36′2″N	Northwest	2606
10	6	2	6-1-2	104°6′22″E 35°36′2″N	Northwest	2606
10	6	3	6-1-3	104°6′22″E 35°36′2″N	Northwest	2606
11	6	1	6-2-1	104°3′25″E 35°39′49″N	Northwest	2846
11	6	2	6-2-2	104°3′25″E 35°39′49″N	Northwest	2846
11	6	3	6-2-3	104°3′25″E 35°39′49″N	Northwest	2846
12	6	1	6-3-1	103°51′58″E 35°45′19″N	North	2704
12	6	2	6-3-2	103°51′58″E 35°45′19″N	North	2704
12	6	3	6-3-3	103°51′58″E 35°45′19″N	North	2704
13	4	1	4-1-1	103°52′21″E 35°46′59″N	Northwest	2804
13	4	2	4-1-2	103°52′21″E 35°46′59″N	Northwest	2804
13	4	3	4-1-3	103°52′21″E 35°46′59″N	Northwest	2804
14	4	1	4-2-1	104°4′37″E 35°38′29″N	North	2765
14	4	2	4-2-2	104°4′37″E 35°38′29″N	North	2765
14	4	3	4-2-3	104°4′37″E 35°38′29″N	North	2765
15	4	1	4-3-1	103°58′8″E 35°40′50″N	Northeast	2710
15	4	2	4-3-2	103°58′8″E 35°40′50″N	Northeast	2710
15	4	3	4-3-3	103°58′8″E 35°40′50″N	Northeast	2710
16	2	1	2-1-1	104°5′32″E 35°37′30″N	North	2595
16	2	2	2-1-2	104°5′32″E 35°37′30″N	North	2595
16	2	3	2-1-3	104°5′32″E 35°37′30″N	North	2595
17	2	1	2-2-1	104°2′16″E 35°39′49″N	Northeast	2783
17	2	2	2-2-2	104°2′16″E 35°39′49″N	Northeast	2783
17	2	3	2-2-3	104°2′16″E 35°39′49″N	Northeast	2783
18	2	1	2-3-1	103°57′1″E 35°41′5″N	Northwest	2694
18	2	2	2-3-2	103°57′1″E 35°41′5″N	Northwest	2694
18	2	3	2-3-3	103°57′1″E 35°41′5″N	Northwest	2694

## Sheet: Community composition
Serial No	Familia	Genus	Species	Treatment	Familia	Genus	Species	Pi	Treatment	Familia	Genus	Species	Pi	Treatment	Familia	Genus	Species	Pi	Treatment	Familia	Genus	Species	Pi	Treatment	Familia	Genus	Species	Pi	Treatment	Familia	Genus	Species	Pi
1	Asteraceae	Aster	Aster altaicus	CK	Cyperaceae	Carex	Carex myosuroides	0.081964	10	Cyperaceae	Carex	Carex myosuroides	0.08028	8	Cyperaceae	Carex	Carex myosuroides	0.103745	6	Cyperaceae	Carex	Carex myosuroides	0.100414	4	Poaceae	Gentianopsis	Agropyron cristatum	0.142699	2	Poaceae	Gentianopsis	Agropyron cristatum	0.132245
2	Asteraceae	Leontopodium	Leontopodium nanum	CK	Poaceae	Gentianopsis	Agropyron cristatum	0.0542107	10	Poaceae	Gentianopsis	Agropyron cristatum	0.0748677	8	Poaceae	Gentianopsis	Agropyron cristatum	0.0808144	6	Poaceae	Gentianopsis	Agropyron cristatum	0.0912016	4	Poaceae	Festuca	Festuca elata	0.106943	2	Thymelaeaceae	Stellera	Stellera chamaejasme	0.118362
3	Asteraceae	Artemisia	Artemisia argyi	CK	Poaceae	Stipa	Stipa breviflora	0.0447246	10	Poaceae	Poa	Poa pratensis	0.0629442	8	Poaceae	Stipa	Stipa breviflora	0.076131	6	Poaceae	Stipa	Stipa breviflora	0.0711748	4	Polygonaceae	Knorringia	Knorringia sibirica	0.0762687	2	Asteraceae	Saussurea	Saussurea pulchra	0.118251
4	Asteraceae	Artemisia	Artemisia stechmanniana	CK	Poaceae	Poa	Poa pratensis	0.0420425	10	Poaceae	Festuca	Festuca elata	0.0602316	8	Asteraceae	Aster	Aster altaicus	0.0543239	6	Polygonaceae	Knorringia	Knorringia sibirica	0.0670779	4	Asteraceae	Ixeris	Ixeris polycephala	0.0696709	2	Asteraceae	Taraxacum	Taraxacum mongolicum	0.083291
5	Gentianaceae	Gentianopsis	Gentianopsis barbata	CK	Poaceae	Elymus	Elymus nutans	0.039286	10	Rosaceae	Potentilla	Potentilla supina	0.0505046	8	Rosaceae	Potentilla	Potentilla supina	0.0497442	6	Fabaceae	Medicago	Medicago ruthenica	0.0554799	4	Asteraceae	Anaphalis	Anaphalis lactea	0.0612741	2	Lamiaceae	Elsholtzia	Elsholtzia densa	0.0788577
6	Poaceae	Gentianopsis	Agropyron cristatum	CK	Geraniaceae	Geranium	Geranium wilfordii	0.0390896	10	Poaceae	Stipa	Stipa breviflora	0.0500168	8	Geraniaceae	Geranium	Geranium wilfordii	0.0471355	6	Asteraceae	Artemisia	Artemisia capillaris	0.042092	4	Thymelaeaceae	Stellera	Stellera chamaejasme	0.0596361	2	Asteraceae	Artemisia	Artemisia hedinii	0.0716334
7	Poaceae	Agropyron	Poa pratensis	CK	Poaceae	Festuca	Festuca elata	0.0388261	10	Poaceae	Elymus	Elymus nutans	0.0448489	8	Fabaceae	Oxytropis	Oxytropis kansuensis	0.0460188	6	Asteraceae	Taraxacum	Taraxacum mongolicum	0.0416587	4	Asteraceae	Aster	Aster altaicus	0.0546298	2	Asteraceae	Aster	Aster altaicus	0.0687246
8	Rosaceae	Potentilla	Potentilla supina	CK	Rosaceae	Potentilla	Potentilla supina	0.0372704	10	Geraniaceae	Geranium	Geranium wilfordii	0.0442462	8	Amaryllidaceae	Allium	Allium mongolicum	0.0422187	6	Geraniaceae	Geranium	Geranium wilfordii	0.0381659	4	Asteraceae	Artemisia	Artemisia hedinii	0.0472631	2	Asteraceae	Artemisia	Artemisia stechmanniana	0.0634559
9	Plantaginaceae	Plantago	Plantago asiatica	CK	Polygonaceae	Knorringia	Knorringia sibirica	0.0370231	10	Fabaceae	Oxytropis	Oxytropis kansuensis	0.0358337	8	Asteraceae	Taraxacum	Taraxacum mongolicum	0.041162	6	Asteraceae	Ajania	Ajania tenuifolia	0.0378038	4	Asteraceae	Artemisia	Artemisia capillaris	0.0456233	2	Asteraceae	Artemisia	Artemisia capillaris	0.0608554
10	Asteraceae	Artemisia	Artemisia hedinii	CK	Asteraceae	Ligularia	Ligularia sagitta	0.0353985	10	Rosaceae	Potentilla	Potentilla sericea	0.0322755	8	Polygonaceae	Knorringia	Knorringia sibirica	0.0400933	6	Asteraceae	Aster	Aster altaicus	0.0376955	4	Poaceae	Poa	Poa pratensis	0.0450189	2	Asteraceae	Aster	Aster tataricus	0.039056
11	Poaceae	Elymus	Elymus nutans	CK	Fabaceae	Medicago	Medicago ruthenica	0.0322265	10	Polygonaceae	Knorringia	Knorringia sibirica	0.0318659	8	Fabaceae	Medicago	Medicago ruthenica	0.0398152	6	Rosaceae	Potentilla	Potentilla supina	0.0376015	4	Asteraceae	Artemisia	Artemisia stechmanniana	0.0431923	2	Ranunculaceae	Clematis	Clematis florida	0.0335326
12	Asteraceae	Cirsium	Cirsium arvense	CK	Rosaceae	Potentilla	Potentilla sericea	0.0310649	10	Fabaceae	Medicago	Medicago ruthenica	0.0274827	8	Asteraceae	Artemisia	Artemisia capillaris	0.0359596	6	Asteraceae	Saussurea	Saussurea pulchra	0.0373691	4	Iridaceae	Iris	Iris lactea	0.0345686	2	Asteraceae	Ajania	Ajania tenuifolia	0.0292583
13	Gentianaceae	Gentiana	Gentiana dahurica	CK	Asteraceae	Saussurea	Saussurea pulchra	0.0299393	10	Asteraceae	Saussurea	Saussurea pulchra	0.0248624	8	Poaceae	Elymus	Elymus nutans	0.0328929	6	Asteraceae	Leontopodium	Leontopodium nanum	0.0332314	4	Asteraceae	Taraxacum	Taraxacum mongolicum	0.0312924	2	Fabaceae	Medicago	Medicago ruthenica	0.0226282
14	Convolvulaceae	Calystegia	Calystegia hederacea	CK	Fabaceae	Oxytropis	Oxytropis kansuensis	0.026775	10	Asteraceae	Ixeris	Ixeris polycephala	0.0235439	8	Asteraceae	Ajania	Ajania tenuifolia	0.0292594	6	Poaceae	Elymus	Elymus nutans	0.0330502	4	Fabaceae	Oxytropis	Oxytropis kansuensis	0.0308907	2	Amaranthaceae	Kali	Kali collinum	0.0133967
15	Asteraceae	Cirsium	Cirsium spicatum	CK	Asteraceae	Taraxacum	Taraxacum mongolicum	0.0257422	10	Amaryllidaceae	Allium	Allium mongolicum	0.0213653	8	Asteraceae	Leontopodium	Leontopodium nanum	0.0282183	6	Asteraceae	Artemisia	Artemisia argyi	0.0320732	4	Fabaceae	Medicago	Medicago ruthenica	0.0294932	2	Convolvulaceae	Calystegia	Calystegia hederacea	0.00827844
16	Rosaceae	Sanguisorba	Sanguisorba officinalis	CK	Gentianaceae	Gentiana	Gentiana straminea	0.0245599	10	Asteraceae	Artemisia	Artemisia capillaris	0.0207388	8	Poaceae	Poa	Poa pratensis	0.0259414	6	Amaryllidaceae	Allium	Allium mongolicum	0.0276484	4	Poaceae	Elymus	Elymus nutans	0.0284105	2	Poaceae	Neotrinia	Neotrinia splendens	0.00588514
17	Primulaceae	Androsace	Androsace umbellata	CK	Amaryllidaceae	Allium	Allium mongolicum	0.0234284	10	Amaranthaceae	Dysphania	Dysphania schraderiana	0.0195558	8	Ranunculaceae	Gymnaconitum	Gymnaconitum gymnandrum	0.0250961	6	Asteraceae	Artemisia	Artemisia hedinii	0.0268452	4	Lamiaceae	Nepeta	Nepeta cataria	0.0237526	2	Asteraceae	Cirsium	Cirsium arvense	0.00431598
18	Apiaceae	Cicuta	Cicuta virosa	CK	Asteraceae	Artemisia	Artemisia capillaris	0.0229315	10	Lamiaceae	Nepeta	Nepeta cataria	0.0194334	8	Asteraceae	Saussurea	Saussurea pulchra	0.0243061	6	Poaceae	Poa	Poa pratensis	0.0266733	4	Asteraceae	Ajania	Ajania tenuifolia	0.0180883	2	Orobanchaceae	Pedicularis	Pedicularis sylvatica	0.00381092
19	Poaceae	Stipa	Stipa breviflora	CK	Lamiaceae	Nepeta	Nepeta cataria	0.0222334	10	Lamiaceae	Scutellaria	Scutellaria baicalensis	0.0189154	8	Rosaceae	Potentilla	Potentilla sericea	0.0237985	6	Thymelaeaceae	Stellera	Stellera chamaejasme	0.0256235	4	Poaceae	Neotrinia	Neotrinia splendens	0.0061044	2	Asteraceae	Ixeris	Ixeris polycephala	0.000714341
20	Asteraceae	Carduus	Carduus nutans	CK	Asteraceae	Ixeris	Ixeris polycephala	0.0196835	10	Lamiaceae	Elsholtzia	Elsholtzia densa	0.0186316	8	Asteraceae	Artemisia	Artemisia argyi	0.0191883	6	Rosaceae	Potentilla	Potentilla sericea	0.0253019	4	Plantaginaceae	Plantago	Plantago asiatica	0.00583946	2	9	16	19
21	Fabaceae	Oxytropis	Oxytropis kansuensis	CK	Asteraceae	Ajania	Ajania tenuifolia	0.0182503	10	Asteraceae	Ajania	Ajania tenuifolia	0.0186017	8	Asteraceae	Artemisia	Artemisia stechmanniana	0.0190871	6	Asteraceae	Anaphalis	Anaphalis lactea	0.0252244	4	Asteraceae	Cirsium	Cirsium arvense	0.00448399	2
22	Fabaceae	Tibetia	Tibetia himalaica	CK	Lamiaceae	Elsholtzia	Elsholtzia densa	0.0175227	10	Asteraceae	Aster	Aster tataricus	0.0155889	8	Asteraceae	Artemisia	Artemisia hedinii	0.0177774	6	Fabaceae	Oxytropis	Oxytropis kansuensis	0.0209182	4	Orobanchaceae	Pedicularis	Pedicularis sylvatica	0.00100077	2
23	Poaceae	Festuca	Festuca elata	CK	Amaranthaceae	Dysphania	Dysphania schraderiana	0.0172592	10	Poaceae	Neotrinia	Neotrinia splendens	0.015086	8	Gentianaceae	Gentiana	Gentiana straminea	0.0177592	6	Thymelaeaceae	Daphne	Daphne tangutica	0.0151546	4	9	20	22
24	Fabaceae	Medicago	Medicago ruthenica	CK	Iridaceae	Iris	Iris lactea	0.0169792	10	Asteraceae	Ligularia	Ligularia sagitta	0.0147679	8	Ranunculaceae	Clematis	Clematis florida	0.0169875	6	Asteraceae	Artemisia	Artemisia stechmanniana	0.0102184	4
25	Lamiaceae	Scutellaria	Scutellaria baicalensis	CK	Asteraceae	Aster	Aster tataricus	0.0161138	10	Asteraceae	Aster	Aster altaicus	0.0144058	8	Lamiaceae	Nepeta	Nepeta cataria	0.0132947	6	Asteraceae	Cirsium	Cirsium arvense	0.00908971	4
26	Poaceae	Neotrinia	Neotrinia splendens	CK	Euphorbiaceae	Euphorbia	Euphorbia esula	0.0153465	10	Asteraceae	Artemisia	Artemisia stechmanniana	0.0140898	8	Asteraceae	Cirsium	Cirsium arvense	0.012386	6	Primulaceae	Androsace	Androsace umbellata	0.0071957	4
27	Asteraceae	Ligularia	Ligularia sagitta	CK	Ranunculaceae	Clematis	Clematis florida	0.0153375	10	Asteraceae	Cirsium	Cirsium arvense	0.0139026	8	Fabaceae	Thermopsis	Thermopsis lupinoides	0.00865288	6	Asteraceae	Aster	Aster tataricus	0.00587986	4
28	Lamiaceae	Nepeta	Nepeta cataria	CK	Asteraceae	Anaphalis	Anaphalis lactea	0.0145033	10	Primulaceae	Androsace	Androsace umbellata	0.0135025	8	Mazaceae	Lancea	Lancea tibetica	0.00657437	6	Plantaginaceae	Plantago	Plantago asiatica	0.00305863	4
29	Amaranthaceae	Dysphania	Dysphania schraderiana	CK	Ranunculaceae	Gymnaconitum	Gymnaconitum gymnandrum	0.0142499	10	Asteraceae	Leontopodium	Leontopodium nanum	0.0134512	8	Plantaginaceae	Plantago	Plantago asiatica	0.00506647	6	Convolvulaceae	Calystegia	Calystegia hederacea	0.00235018	4
30	Rosaceae	Potentilla	Potentilla sericea	CK	Asteraceae	Leontopodium	Leontopodium nanum	0.0130908	10	Orobanchaceae	Pedicularis	Pedicularis sylvatica	0.0126096	8	Rosaceae	Sanguisorba	Sanguisorba officinalis	0.00321285	6	Orobanchaceae	Pedicularis	Pedicularis sylvatica	0.00190672	4
31	Asteraceae	Ixeris	Ixeris polycephala	CK	Orobanchaceae	Pedicularis	Pedicularis sylvatica	0.012687	10	Gentianaceae	Gentiana	Gentiana dahurica	0.0120469	8	Poaceae	Neotrinia	Neotrinia splendens	0.00254583	6	Rosaceae	Sanguisorba	Sanguisorba officinalis	0.00116881	4
32	Thymelaeaceae	Stellera	Stellera chamaejasme	CK	Gentianaceae	Gentiana	Gentiana dahurica	0.0120999	10	Asteraceae	Artemisia	Artemisia argyi	0.0112721	8	Amaranthaceae	Kali	Kali collinum	0.00143273	6	Gentianaceae	Gentiana	Gentiana scabra	0.000943801	4
33	Geraniaceae	Geranium	Geranium wilfordii	CK	Fabaceae	Thermopsis	Thermopsis lupinoides	0.0118031	10	Convolvulaceae	Calystegia	Calystegia hederacea	0.0105261	8	Convolvulaceae	Calystegia	Calystegia hederacea	0.00137793	6	Asteraceae	Cirsium	Cirsium spicatum	0.000906324	4
34	Gentianaceae	Gentiana	Gentiana scabra	CK	Asteraceae	Aster	Aster altaicus	0.0115885	10	Fabaceae	Thermopsis	Thermopsis lupinoides	0.0101145	8	Asteraceae	Cirsium	Cirsium spicatum	0.00086024	6	14	27	33
35	Ranunculaceae	Gymnaconitum	Gymnaconitum gymnandrum	CK	Gentianaceae	Gentiana	Gentiana scabra	0.0105833	10	Plantaginaceae	Plantago	Plantago asiatica	0.00919967	8	Gentianaceae	Gentianopsis	Gentianopsis barbata	0.000452375	6
36	Gentianaceae	Gentiana	Gentiana straminea	CK	Gentianaceae	Gentianopsis	Gentianopsis barbata	0.010544	10	Asteraceae	Artemisia	Artemisia hedinii	0.00879295		15	30	35
37	Iridaceae	Iris	Iris lactea	CK	Asteraceae	Artemisia	Artemisia stechmanniana	0.0101829	10	Fabaceae	Tibetia	Tibetia himalaica	0.00635736
38	Orobanchaceae	Pedicularis	Pedicularis sylvatica	CK	Asteraceae	Artemisia	Artemisia argyi	0.0101755	10	Gentianaceae	Gentianopsis	Gentianopsis barbata	0.00587823
39	Asteraceae	Saussurea	Saussurea pulchra	CK	Mazaceae	Lancea	Lancea tibetica	0.00863121	10	Rosaceae	Sanguisorba	Sanguisorba officinalis	0.00439341
40	Amaryllidaceae	Allium	Allium mongolicum	CK	Asteraceae	Artemisia	Artemisia hedinii	0.00733916	10	Apiaceae	Cicuta	Cicuta virosa	0.0043004
41	Lamiaceae	Elsholtzia	Elsholtzia densa	CK	Rosaceae	Sanguisorba	Sanguisorba officinalis	0.00652222	10	Asteraceae	Cirsium	Cirsium spicatum	0.00376949
42	Asteraceae	Taraxacum	Taraxacum mongolicum	CK	Plantaginaceae	Plantago	Plantago asiatica	0.00606216	10	Asteraceae	Carduus	Carduus nutans	0.00117404
43	Mazaceae	Lancea	Lancea tibetica	CK	Asteraceae	Cirsium	Cirsium spicatum	0.00509148	10	16	36	42
44	Asteraceae	Anaphalis	Anaphalis lactea	CK	Asteraceae	Cirsium	Cirsium arvense	0.00498717	10
45	Euphorbiaceae	Euphorbia	Euphorbia esula	CK	Poaceae	Neotrinia	Neotrinia splendens	0.00130552	10
46	Cyperaceae	Carex	Carex myosuroides	CK	Asteraceae	Carduus	Carduus nutans	0.00123586	10
47	Thymelaeaceae	Daphne	Daphne tangutica	CK	Primulaceae	Androsace	Androsace umbellata	0.000202704	10
48	Ranunculaceae	Clematis	Clematis florida		18	39	47
49	Polygonaceae	Knorringia	Knorringia sibirica
50	Asteraceae	Ajania	Ajania tenuifolia
51	Fabaceae	Thermopsis	Thermopsis lupinoides
52	Asteraceae	Artemisia	Artemisia capillaris
53	Amaranthaceae	Kali	Kali collinum
54	Asteraceae	Aster	Aster tataricus
	21	46	54

## Sheet: Coverage
Treatment	Species	Coverage	Total coverage	Quadrat coverage	Average coverage of sample plot	Average coverage
CK-1-1	Aster altaicus	4	765	0.997386	0.994548	0.994345		Artificial afforestation（year）	Coverage（%）	Error	Significance
CK-1-1	Leontopodium nanum	5						CK	0.9943	0.0029	a
CK-1-1	Artemisia argyi	6						10	0.9888	0.0028	ab
CK-1-1	Artemisia stechmanniana	7						8	0.98	0.0062	ab
CK-1-1	Gentianopsis barbata	6						6	0.9766	0.0079	b
CK-1-1	Agropyron cristatum	12						4	0.8984	0.0237	c
CK-1-1	Poa pratensis	32						2	0.8697	0.0267	d
CK-1-1	Potentilla supina	44
CK-1-1	Plantago asiatica	3
CK-1-1	Artemisia hedinii	7
CK-1-1	Elymus nutans	19
CK-1-1	Cirsium arvense	4
CK-1-1	Gentiana dahurica	6
CK-1-1	Calystegia hederacea
CK-1-1	Cirsium spicatum	3
CK-1-1	Sanguisorba officinalis	3
CK-1-1	Androsace umbellata
CK-1-1	Cicuta virosa
CK-1-1	Stipa breviflora	24
CK-1-1	Carduus nutans
CK-1-1	Oxytropis kansuensis	16
CK-1-1	Tibetia himalaica
CK-1-1	Festuca elata	36
CK-1-1	Medicago ruthenica	24
CK-1-1	Scutellaria baicalensis
CK-1-1	Neotrinia splendens
CK-1-1	Ligularia sagitta	64
CK-1-1	Nepeta cataria	17
CK-1-1	Dysphania schraderiana	16
CK-1-1	Potentilla sericea	24
CK-1-1	Ixeris polycephala	11
CK-1-1	Stellera chamaejasme
CK-1-1	Geranium wilfordii	24
CK-1-1	Gentiana scabra	14
CK-1-1	Gymnaconitum gymnandrum	18
CK-1-1	Gentiana straminea	15
CK-1-1	Iris lactea	8
CK-1-1	Pedicularis sylvatica	11
CK-1-1	Saussurea pulchra	32
CK-1-1	Allium mongolicum	18
CK-1-1	Elsholtzia densa	22
CK-1-1	Taraxacum mongolicum	26
CK-1-1	Lancea tibetica	4
CK-1-1	Anaphalis lactea	7
CK-1-1	Euphorbia esula	10
CK-1-1	Carex myosuroides	72
CK-1-1	Daphne tangutica
CK-1-1	Clematis florida	12
CK-1-1	Knorringia sibirica	24
CK-1-1	Ajania tenuifolia	14
CK-1-1	Thermopsis lupinoides	11
CK-1-1	Artemisia capillaris	8
CK-1-1	Kali collinum
CK-1-1	Aster tataricus	20
CK-1-1	Bare area	2
CK-1-2	Aster altaicus	3	611	0.993453
CK-1-2	Leontopodium nanum	4
CK-1-2	Artemisia argyi	5
CK-1-2	Artemisia stechmanniana	6
CK-1-2	Gentianopsis barbata	5
CK-1-2	Agropyron cristatum	10
CK-1-2	Poa pratensis	26
CK-1-2	Potentilla supina	35
CK-1-2	Plantago asiatica	2
CK-1-2	Artemisia hedinii	6
CK-1-2	Elymus nutans	15
CK-1-2	Cirsium arvense	3
CK-1-2	Gentiana dahurica	5
CK-1-2	Calystegia hederacea
CK-1-2	Cirsium spicatum
CK-1-2	Sanguisorba officinalis
CK-1-2	Androsace umbellata
CK-1-2	Cicuta virosa
CK-1-2	Stipa breviflora	19
CK-1-2	Carduus nutans
CK-1-2	Oxytropis kansuensis	13
CK-1-2	Tibetia himalaica
CK-1-2	Festuca elata	29
CK-1-2	Medicago ruthenica	19
CK-1-2	Scutellaria baicalensis
CK-1-2	Neotrinia splendens
CK-1-2	Ligularia sagitta	51
CK-1-2	Nepeta cataria	14
CK-1-2	Dysphania schraderiana	13
CK-1-2	Potentilla sericea	19
CK-1-2	Ixeris polycephala	9
CK-1-2	Stellera chamaejasme
CK-1-2	Geranium wilfordii	19
CK-1-2	Gentiana scabra	11
CK-1-2	Gymnaconitum gymnandrum	14
CK-1-2	Gentiana straminea	12
CK-1-2	Iris lactea	6
CK-1-2	Pedicularis sylvatica	9
CK-1-2	Saussurea pulchra	26
CK-1-2	Allium mongolicum	14
CK-1-2	Elsholtzia densa	18
CK-1-2	Taraxacum mongolicum	21
CK-1-2	Lancea tibetica	3
CK-1-2	Anaphalis lactea	6
CK-1-2	Euphorbia esula	8
CK-1-2	Carex myosuroides	58
CK-1-2	Daphne tangutica
CK-1-2	Clematis florida	10
CK-1-2	Knorringia sibirica	19
CK-1-2	Ajania tenuifolia	11
CK-1-2	Thermopsis lupinoides	9
CK-1-2	Artemisia capillaris	6
CK-1-2	Kali collinum
CK-1-2	Aster tataricus	16
CK-1-2	Bare area	4
CK-1-3	Aster altaicus	6	1112	0.992806
CK-1-3	Leontopodium nanum	8
CK-1-3	Artemisia argyi	9
CK-1-3	Artemisia stechmanniana	11
CK-1-3	Gentianopsis barbata	9
CK-1-3	Agropyron cristatum	18
CK-1-3	Poa pratensis	48
CK-1-3	Potentilla supina	66
CK-1-3	Plantago asiatica	5
CK-1-3	Artemisia hedinii	11
CK-1-3	Elymus nutans	29
CK-1-3	Cirsium arvense	6
CK-1-3	Gentiana dahurica	9
CK-1-3	Calystegia hederacea
CK-1-3	Cirsium spicatum	5
CK-1-3	Sanguisorba officinalis	5
CK-1-3	Androsace umbellata	1
CK-1-3	Cicuta virosa
CK-1-3	Stipa breviflora	36
CK-1-3	Carduus nutans
CK-1-3	Oxytropis kansuensis	24
CK-1-3	Tibetia himalaica
CK-1-3	Festuca elata	54
CK-1-3	Medicago ruthenica	36
CK-1-3	Scutellaria baicalensis
CK-1-3	Neotrinia splendens	2
CK-1-3	Ligularia sagitta	67
CK-1-3	Nepeta cataria	26
CK-1-3	Dysphania schraderiana	24
CK-1-3	Potentilla sericea	36
CK-1-3	Ixeris polycephala	17
CK-1-3	Stellera chamaejasme
CK-1-3	Geranium wilfordii	36
CK-1-3	Gentiana scabra	21
CK-1-3	Gymnaconitum gymnandrum	27
CK-1-3	Gentiana straminea	23
CK-1-3	Iris lactea	12
CK-1-3	Pedicularis sylvatica	17
CK-1-3	Saussurea pulchra	48
CK-1-3	Allium mongolicum	27
CK-1-3	Elsholtzia densa	33
CK-1-3	Taraxacum mongolicum	39
CK-1-3	Lancea tibetica	6
CK-1-3	Anaphalis lactea	11
CK-1-3	Euphorbia esula	15
CK-1-3	Carex myosuroides	87
CK-1-3	Daphne tangutica
CK-1-3	Clematis florida	18
CK-1-3	Knorringia sibirica	36
CK-1-3	Ajania tenuifolia	21
CK-1-3	Thermopsis lupinoides	17
CK-1-3	Artemisia capillaris	12
CK-1-3	Kali collinum
CK-1-3	Aster tataricus	30
CK-1-3	Bare area	8
CK-2-1	Aster altaicus	5	771	0.998703	0.996487
CK-2-1	Leontopodium nanum	6
CK-2-1	Artemisia argyi	5
CK-2-1	Artemisia stechmanniana	8
CK-2-1	Gentianopsis barbata	5
CK-2-1	Agropyron cristatum	33
CK-2-1	Poa pratensis	32
CK-2-1	Potentilla supina	29
CK-2-1	Plantago asiatica
CK-2-1	Artemisia hedinii	7
CK-2-1	Elymus nutans	22
CK-2-1	Cirsium arvense	3
CK-2-1	Gentiana dahurica	7
CK-2-1	Calystegia hederacea
CK-2-1	Cirsium spicatum	4
CK-2-1	Sanguisorba officinalis	4
CK-2-1	Androsace umbellata
CK-2-1	Cicuta virosa
CK-2-1	Stipa breviflora	32
CK-2-1	Carduus nutans
CK-2-1	Oxytropis kansuensis	15
CK-2-1	Tibetia himalaica
CK-2-1	Festuca elata	35
CK-2-1	Medicago ruthenica	22
CK-2-1	Scutellaria baicalensis
CK-2-1	Neotrinia splendens
CK-2-1	Ligularia sagitta	38
CK-2-1	Nepeta cataria	15
CK-2-1	Dysphania schraderiana	12
CK-2-1	Potentilla sericea	25
CK-2-1	Ixeris polycephala	13
CK-2-1	Stellera chamaejasme
CK-2-1	Geranium wilfordii	38
CK-2-1	Gentiana scabra	12
CK-2-1	Gymnaconitum gymnandrum	20
CK-2-1	Gentiana straminea	19
CK-2-1	Iris lactea	10
CK-2-1	Pedicularis sylvatica	7
CK-2-1	Saussurea pulchra	28
CK-2-1	Allium mongolicum	20
CK-2-1	Elsholtzia densa	20
CK-2-1	Taraxacum mongolicum	18
CK-2-1	Lancea tibetica	6
CK-2-1	Anaphalis lactea	8
CK-2-1	Euphorbia esula	12
CK-2-1	Carex myosuroides	85
CK-2-1	Daphne tangutica
CK-2-1	Clematis florida	10
CK-2-1	Knorringia sibirica	29
CK-2-1	Ajania tenuifolia	15
CK-2-1	Thermopsis lupinoides	8
CK-2-1	Artemisia capillaris	10
CK-2-1	Kali collinum
CK-2-1	Aster tataricus	18
CK-2-1	Bare area	1
CK-2-2	Aster altaicus	4	628	0.995223
CK-2-2	Leontopodium nanum	5
CK-2-2	Artemisia argyi	4
CK-2-2	Artemisia stechmanniana	6
CK-2-2	Gentianopsis barbata	4
CK-2-2	Agropyron cristatum	37
CK-2-2	Poa pratensis	22
CK-2-2	Potentilla supina	21
CK-2-2	Plantago asiatica	2
CK-2-2	Artemisia hedinii	6
CK-2-2	Elymus nutans	18
CK-2-2	Cirsium arvense	2
CK-2-2	Gentiana dahurica	6
CK-2-2	Calystegia hederacea
CK-2-2	Cirsium spicatum	3
CK-2-2	Sanguisorba officinalis	3
CK-2-2	Androsace umbellata
CK-2-2	Cicuta virosa
CK-2-2	Stipa breviflora	26
CK-2-2	Carduus nutans
CK-2-2	Oxytropis kansuensis	12
CK-2-2	Tibetia himalaica
CK-2-2	Festuca elata	28
CK-2-2	Medicago ruthenica	18
CK-2-2	Scutellaria baicalensis
CK-2-2	Neotrinia splendens	3
CK-2-2	Ligularia sagitta	30
CK-2-2	Nepeta cataria	12
CK-2-2	Dysphania schraderiana	10
CK-2-2	Potentilla sericea	20
CK-2-2	Ixeris polycephala	10
CK-2-2	Stellera chamaejasme
CK-2-2	Geranium wilfordii	30
CK-2-2	Gentiana scabra	10
CK-2-2	Gymnaconitum gymnandrum	16
CK-2-2	Gentiana straminea	15
CK-2-2	Iris lactea	8
CK-2-2	Pedicularis sylvatica	6
CK-2-2	Saussurea pulchra	22
CK-2-2	Allium mongolicum	16
CK-2-2	Elsholtzia densa	16
CK-2-2	Taraxacum mongolicum	14
CK-2-2	Lancea tibetica	5
CK-2-2	Anaphalis lactea	6
CK-2-2	Euphorbia esula	10
CK-2-2	Carex myosuroides	68
CK-2-2	Daphne tangutica
CK-2-2	Clematis florida	8
CK-2-2	Knorringia sibirica	23
CK-2-2	Ajania tenuifolia	12
CK-2-2	Thermopsis lupinoides	6
CK-2-2	Artemisia capillaris	8
CK-2-2	Kali collinum
CK-2-2	Aster tataricus	14
CK-2-2	Bare area	3
CK-2-3	Aster altaicus	8	1120	0.995536
CK-2-3	Leontopodium nanum	9
CK-2-3	Artemisia argyi	8
CK-2-3	Artemisia stechmanniana	12
CK-2-3	Gentianopsis barbata	8
CK-2-3	Agropyron cristatum	50
CK-2-3	Poa pratensis	48
CK-2-3	Potentilla supina	44
CK-2-3	Plantago asiatica	5
CK-2-3	Artemisia hedinii	11
CK-2-3	Elymus nutans	33
CK-2-3	Cirsium arvense	5
CK-2-3	Gentiana dahurica	11
CK-2-3	Calystegia hederacea
CK-2-3	Cirsium spicatum	6
CK-2-3	Sanguisorba officinalis	6
CK-2-3	Androsace umbellata
CK-2-3	Cicuta virosa
CK-2-3	Stipa breviflora	48
CK-2-3	Carduus nutans
CK-2-3	Oxytropis kansuensis	23
CK-2-3	Tibetia himalaica
CK-2-3	Festuca elata	53
CK-2-3	Medicago ruthenica	33
CK-2-3	Scutellaria baicalensis
CK-2-3	Neotrinia splendens
CK-2-3	Ligularia sagitta	41
CK-2-3	Nepeta cataria	23
CK-2-3	Dysphania schraderiana	18
CK-2-3	Potentilla sericea	38
CK-2-3	Ixeris polycephala	20
CK-2-3	Stellera chamaejasme
CK-2-3	Geranium wilfordii	57
CK-2-3	Gentiana scabra	18
CK-2-3	Gymnaconitum gymnandrum	30
CK-2-3	Gentiana straminea	29
CK-2-3	Iris lactea	15
CK-2-3	Pedicularis sylvatica	11
CK-2-3	Saussurea pulchra	42
CK-2-3	Allium mongolicum	30
CK-2-3	Elsholtzia densa	30
CK-2-3	Taraxacum mongolicum	27
CK-2-3	Lancea tibetica	9
CK-2-3	Anaphalis lactea	12
CK-2-3	Euphorbia esula	18
CK-2-3	Carex myosuroides	90
CK-2-3	Daphne tangutica
CK-2-3	Clematis florida	15
CK-2-3	Knorringia sibirica	44
CK-2-3	Ajania tenuifolia	23
CK-2-3	Thermopsis lupinoides	12
CK-2-3	Artemisia capillaris	15
CK-2-3	Kali collinum
CK-2-3	Aster tataricus	27
CK-2-3	Bare area	5
CK-3-1	Aster altaicus	7	734	0.990463	0.991999
CK-3-1	Leontopodium nanum	5
CK-3-1	Artemisia argyi	7
CK-3-1	Artemisia stechmanniana	9
CK-3-1	Gentianopsis barbata	9
CK-3-1	Agropyron cristatum	45
CK-3-1	Poa pratensis	28
CK-3-1	Potentilla supina	22
CK-3-1	Plantago asiatica	2
CK-3-1	Artemisia hedinii	5
CK-3-1	Elymus nutans	38
CK-3-1	Cirsium arvense	2
CK-3-1	Gentiana dahurica	6
CK-3-1	Calystegia hederacea
CK-3-1	Cirsium spicatum	5
CK-3-1	Sanguisorba officinalis	6
CK-3-1	Androsace umbellata
CK-3-1	Cicuta virosa
CK-3-1	Stipa breviflora	39
CK-3-1	Carduus nutans
CK-3-1	Oxytropis kansuensis	16
CK-3-1	Tibetia himalaica
CK-3-1	Festuca elata	25
CK-3-1	Medicago ruthenica	19
CK-3-1	Scutellaria baicalensis
CK-3-1	Neotrinia splendens
CK-3-1	Ligularia sagitta	30
CK-3-1	Nepeta cataria	17
CK-3-1	Dysphania schraderiana	9
CK-3-1	Potentilla sericea	27
CK-3-1	Ixeris polycephala	8
CK-3-1	Stellera chamaejasme
CK-3-1	Geranium wilfordii	21
CK-3-1	Gentiana scabra
CK-3-1	Gymnaconitum gymnandrum	9
CK-3-1	Gentiana straminea	16
CK-3-1	Iris lactea	8
CK-3-1	Pedicularis sylvatica	8
CK-3-1	Saussurea pulchra	21
CK-3-1	Allium mongolicum	14
CK-3-1	Elsholtzia densa	12
CK-3-1	Taraxacum mongolicum	21
CK-3-1	Lancea tibetica	5
CK-3-1	Anaphalis lactea	8
CK-3-1	Euphorbia esula	13
CK-3-1	Carex myosuroides	92
CK-3-1	Daphne tangutica
CK-3-1	Clematis florida	8
CK-3-1	Knorringia sibirica	31
CK-3-1	Ajania tenuifolia	15
CK-3-1	Thermopsis lupinoides	10
CK-3-1	Artemisia capillaris	21
CK-3-1	Kali collinum
CK-3-1	Aster tataricus	8
CK-3-1	Bare area	7
CK-3-2	Aster altaicus	6	613	0.990212
CK-3-2	Leontopodium nanum	4
CK-3-2	Artemisia argyi	6
CK-3-2	Artemisia stechmanniana	7
CK-3-2	Gentianopsis barbata	7
CK-3-2	Agropyron cristatum	47
CK-3-2	Poa pratensis	22
CK-3-2	Potentilla supina	18
CK-3-2	Plantago asiatica	2
CK-3-2	Artemisia hedinii	4
CK-3-2	Elymus nutans	30
CK-3-2	Cirsium arvense	2
CK-3-2	Gentiana dahurica	5
CK-3-2	Calystegia hederacea
CK-3-2	Cirsium spicatum	4
CK-3-2	Sanguisorba officinalis	5
CK-3-2	Androsace umbellata
CK-3-2	Cicuta virosa
CK-3-2	Stipa breviflora	31
CK-3-2	Carduus nutans	8
CK-3-2	Oxytropis kansuensis	13
CK-3-2	Tibetia himalaica
CK-3-2	Festuca elata	20
CK-3-2	Medicago ruthenica	15
CK-3-2	Scutellaria baicalensis
CK-3-2	Neotrinia splendens
CK-3-2	Ligularia sagitta	24
CK-3-2	Nepeta cataria	14
CK-3-2	Dysphania schraderiana	7
CK-3-2	Potentilla sericea	22
CK-3-2	Ixeris polycephala	6
CK-3-2	Stellera chamaejasme
CK-3-2	Geranium wilfordii	17
CK-3-2	Gentiana scabra	6
CK-3-2	Gymnaconitum gymnandrum	7
CK-3-2	Gentiana straminea	13
CK-3-2	Iris lactea	6
CK-3-2	Pedicularis sylvatica	6
CK-3-2	Saussurea pulchra	17
CK-3-2	Allium mongolicum	11
CK-3-2	Elsholtzia densa	10
CK-3-2	Taraxacum mongolicum	17
CK-3-2	Lancea tibetica	4
CK-3-2	Anaphalis lactea	6
CK-3-2	Euphorbia esula	10
CK-3-2	Carex myosuroides	74
CK-3-2	Daphne tangutica
CK-3-2	Clematis florida	6
CK-3-2	Knorringia sibirica	25
CK-3-2	Ajania tenuifolia	12
CK-3-2	Thermopsis lupinoides	8
CK-3-2	Artemisia capillaris	17
CK-3-2	Kali collinum
CK-3-2	Aster tataricus	6
CK-3-2	Bare area	6
CK-3-3	Aster altaicus	11	1069	0.995323
CK-3-3	Leontopodium nanum	8
CK-3-3	Artemisia argyi	11
CK-3-3	Artemisia stechmanniana	14
CK-3-3	Gentianopsis barbata	14
CK-3-3	Agropyron cristatum	71
CK-3-3	Poa pratensis	42
CK-3-3	Potentilla supina	33
CK-3-3	Plantago asiatica	3
CK-3-3	Artemisia hedinii	8
CK-3-3	Elymus nutans	57
CK-3-3	Cirsium arvense	3
CK-3-3	Gentiana dahurica	9
CK-3-3	Calystegia hederacea
CK-3-3	Cirsium spicatum	8
CK-3-3	Sanguisorba officinalis	9
CK-3-3	Androsace umbellata
CK-3-3	Cicuta virosa
CK-3-3	Stipa breviflora	59
CK-3-3	Carduus nutans
CK-3-3	Oxytropis kansuensis	24
CK-3-3	Tibetia himalaica
CK-3-3	Festuca elata	38
CK-3-3	Medicago ruthenica	29
CK-3-3	Scutellaria baicalensis
CK-3-3	Neotrinia splendens
CK-3-3	Ligularia sagitta	45
CK-3-3	Nepeta cataria	26
CK-3-3	Dysphania schraderiana	14
CK-3-3	Potentilla sericea	41
CK-3-3	Ixeris polycephala	12
CK-3-3	Stellera chamaejasme
CK-3-3	Geranium wilfordii	32
CK-3-3	Gentiana scabra	12
CK-3-3	Gymnaconitum gymnandrum	14
CK-3-3	Gentiana straminea	24
CK-3-3	Iris lactea	12
CK-3-3	Pedicularis sylvatica	12
CK-3-3	Saussurea pulchra	32
CK-3-3	Allium mongolicum	21
CK-3-3	Elsholtzia densa	18
CK-3-3	Taraxacum mongolicum	32
CK-3-3	Lancea tibetica	8
CK-3-3	Anaphalis lactea	12
CK-3-3	Euphorbia esula	20
CK-3-3	Carex myosuroides	85
CK-3-3	Daphne tangutica
CK-3-3	Clematis florida	12
CK-3-3	Knorringia sibirica	47
CK-3-3	Ajania tenuifolia	23
CK-3-3	Thermopsis lupinoides	15
CK-3-3	Artemisia capillaris	32
CK-3-3	Kali collinum
CK-3-3	Aster tataricus	12
CK-3-3	Bare area	5
10-1-1	Aster altaicus	4	741	0.982456	0.986832	0.988826
10-1-1	Leontopodium nanum	5
10-1-1	Artemisia argyi	5
10-1-1	Artemisia stechmanniana	5
10-1-1	Gentianopsis barbata	4
10-1-1	Agropyron cristatum	72
10-1-1	Poa pratensis	41
10-1-1	Potentilla supina	36
10-1-1	Plantago asiatica	4
10-1-1	Artemisia hedinii	4
10-1-1	Elymus nutans	17
10-1-1	Cirsium arvense	5
10-1-1	Gentiana dahurica	4
10-1-1	Calystegia hederacea	4
10-1-1	Cirsium spicatum	1
10-1-1	Sanguisorba officinalis	4
10-1-1	Androsace umbellata	6
10-1-1	Cicuta virosa	1
10-1-1	Stipa breviflora	24
10-1-1	Carduus nutans	3
10-1-1	Oxytropis kansuensis	17
10-1-1	Tibetia himalaica	4
10-1-1	Festuca elata	51
10-1-1	Medicago ruthenica	21
10-1-1	Scutellaria baicalensis	24
10-1-1	Neotrinia splendens	10
10-1-1	Ligularia sagitta	12
10-1-1	Nepeta cataria	12
10-1-1	Dysphania schraderiana	11
10-1-1	Potentilla sericea	22
10-1-1	Ixeris polycephala	19
10-1-1	Stellera chamaejasme
10-1-1	Geranium wilfordii	36
10-1-1	Gentiana scabra
10-1-1	Gymnaconitum gymnandrum
10-1-1	Gentiana straminea
10-1-1	Iris lactea
10-1-1	Pedicularis sylvatica	7
10-1-1	Saussurea pulchra	27
10-1-1	Allium mongolicum	25
10-1-1	Elsholtzia densa	19
10-1-1	Taraxacum mongolicum
10-1-1	Lancea tibetica
10-1-1	Anaphalis lactea
10-1-1	Euphorbia esula
10-1-1	Carex myosuroides	83
10-1-1	Daphne tangutica
10-1-1	Clematis florida
10-1-1	Knorringia sibirica	32
10-1-1	Ajania tenuifolia	17
10-1-1	Thermopsis lupinoides	8
10-1-1	Artemisia capillaris	10
10-1-1	Kali collinum
10-1-1	Aster tataricus	12
10-1-1	Bare area	13
10-1-2	Aster altaicus	7	753	0.988048
10-1-2	Leontopodium nanum	8
10-1-2	Artemisia argyi
10-1-2	Artemisia stechmanniana	8
10-1-2	Gentianopsis barbata	7
10-1-2	Agropyron cristatum	62
10-1-2	Poa pratensis	37
10-1-2	Potentilla supina	33
10-1-2	Plantago asiatica	7
10-1-2	Artemisia hedinii	7
10-1-2	Elymus nutans	18
10-1-2	Cirsium arvense	8
10-1-2	Gentiana dahurica	7
10-1-2	Calystegia hederacea	7
10-1-2	Cirsium spicatum	5
10-1-2	Sanguisorba officinalis	7
10-1-2	Androsace umbellata	9
10-1-2	Cicuta virosa
10-1-2	Stipa breviflora	23
10-1-2	Carduus nutans
10-1-2	Oxytropis kansuensis	18
10-1-2	Tibetia himalaica	7
10-1-2	Festuca elata	45
10-1-2	Medicago ruthenica	21
10-1-2	Scutellaria baicalensis	23
10-1-2	Neotrinia splendens	12
10-1-2	Ligularia sagitta	14
10-1-2	Nepeta cataria	14
10-1-2	Dysphania schraderiana	13
10-1-2	Potentilla sericea	22
10-1-2	Ixeris polycephala	19
10-1-2	Stellera chamaejasme
10-1-2	Geranium wilfordii	33
10-1-2	Gentiana scabra
10-1-2	Gymnaconitum gymnandrum
10-1-2	Gentiana straminea
10-1-2	Iris lactea
10-1-2	Pedicularis sylvatica	10
10-1-2	Saussurea pulchra	26
10-1-2	Allium mongolicum	24
10-1-2	Elsholtzia densa	19
10-1-2	Taraxacum mongolicum
10-1-2	Lancea tibetica
10-1-2	Anaphalis lactea
10-1-2	Euphorbia esula
10-1-2	Carex myosuroides	80
10-1-2	Daphne tangutica
10-1-2	Clematis florida
10-1-2	Knorringia sibirica	30
10-1-2	Ajania tenuifolia	18
10-1-2	Thermopsis lupinoides	10
10-1-2	Artemisia capillaris	12
10-1-2	Kali collinum
10-1-2	Aster tataricus	14
10-1-2	Bare area	9
10-1-3	Aster altaicus	10	1199	0.989992
10-1-3	Leontopodium nanum
10-1-3	Artemisia argyi	12
10-1-3	Artemisia stechmanniana	12
10-1-3	Gentianopsis barbata	10
10-1-3	Agropyron cristatum	98
10-1-3	Poa pratensis	66
10-1-3	Potentilla supina	58
10-1-3	Plantago asiatica	10
10-1-3	Artemisia hedinii	10
10-1-3	Elymus nutans	30
10-1-3	Cirsium arvense	12
10-1-3	Gentiana dahurica	10
10-1-3	Calystegia hederacea	10
10-1-3	Cirsium spicatum
10-1-3	Sanguisorba officinalis
10-1-3	Androsace umbellata	13
10-1-3	Cicuta virosa
10-1-3	Stipa breviflora	41
10-1-3	Carduus nutans
10-1-3	Oxytropis kansuensis	38
10-1-3	Tibetia himalaica
10-1-3	Festuca elata	85
10-1-3	Medicago ruthenica	36
10-1-3	Scutellaria baicalensis	40
10-1-3	Neotrinia splendens	19
10-1-3	Ligularia sagitta	24
10-1-3	Nepeta cataria	22
10-1-3	Dysphania schraderiana	21
10-1-3	Potentilla sericea	37
10-1-3	Ixeris polycephala	33
10-1-3	Stellera chamaejasme
10-1-3	Geranium wilfordii	58
10-1-3	Gentiana scabra
10-1-3	Gymnaconitum gymnandrum
10-1-3	Gentiana straminea
10-1-3	Iris lactea
10-1-3	Pedicularis sylvatica	15
10-1-3	Saussurea pulchra	45
10-1-3	Allium mongolicum	42
10-1-3	Elsholtzia densa	33
10-1-3	Taraxacum mongolicum
10-1-3	Lancea tibetica
10-1-3	Anaphalis lactea
10-1-3	Euphorbia esula
10-1-3	Carex myosuroides	98
10-1-3	Daphne tangutica
10-1-3	Clematis florida
10-1-3	Knorringia sibirica	52
10-1-3	Ajania tenuifolia	30
10-1-3	Thermopsis lupinoides	16
10-1-3	Artemisia capillaris	19
10-1-3	Kali collinum
10-1-3	Aster tataricus	22
10-1-3	Bare area	12
10-2-1	Aster altaicus	10	933	0.991426	0.990952
10-2-1	Leontopodium nanum	11
10-2-1	Artemisia argyi	9
10-2-1	Artemisia stechmanniana	10
10-2-1	Gentianopsis barbata	8
10-2-1	Agropyron cristatum	86
10-2-1	Poa pratensis	67
10-2-1	Potentilla supina	42
10-2-1	Plantago asiatica	10
10-2-1	Artemisia hedinii	7
10-2-1	Elymus nutans	35
10-2-1	Cirsium arvense	11
10-2-1	Gentiana dahurica	10
10-2-1	Calystegia hederacea	9
10-2-1	Cirsium spicatum
10-2-1	Sanguisorba officinalis
10-2-1	Androsace umbellata	9
10-2-1	Cicuta virosa
10-2-1	Stipa breviflora	40
10-2-1	Carduus nutans
10-2-1	Oxytropis kansuensis	36
10-2-1	Tibetia himalaica	7
10-2-1	Festuca elata	62
10-2-1	Medicago ruthenica	22
10-2-1	Scutellaria baicalensis	24
10-2-1	Neotrinia splendens	12
10-2-1	Ligularia sagitta	19
10-2-1	Nepeta cataria	18
10-2-1	Dysphania schraderiana	19
10-2-1	Potentilla sericea	22
10-2-1	Ixeris polycephala	24
10-2-1	Stellera chamaejasme
10-2-1	Geranium wilfordii	42
10-2-1	Gentiana scabra
10-2-1	Gymnaconitum gymnandrum
10-2-1	Gentiana straminea
10-2-1	Iris lactea
10-2-1	Pedicularis sylvatica	9
10-2-1	Saussurea pulchra	29
10-2-1	Allium mongolicum	22
10-2-1	Elsholtzia densa	18
10-2-1	Taraxacum mongolicum
10-2-1	Lancea tibetica
10-2-1	Anaphalis lactea
10-2-1	Euphorbia esula
10-2-1	Carex myosuroides	72
10-2-1	Daphne tangutica
10-2-1	Clematis florida
10-2-1	Knorringia sibirica	32
10-2-1	Ajania tenuifolia	19
10-2-1	Thermopsis lupinoides	10
10-2-1	Artemisia capillaris	19
10-2-1	Kali collinum
10-2-1	Aster tataricus	14
10-2-1	Bare area	8
10-2-2	Aster altaicus	9	797	0.992472
10-2-2	Leontopodium nanum	10
10-2-2	Artemisia argyi	8
10-2-2	Artemisia stechmanniana	9
10-2-2	Gentianopsis barbata	7
10-2-2	Agropyron cristatum	86
10-2-2	Poa pratensis	67
10-2-2	Potentilla supina	34
10-2-2	Plantago asiatica	9
10-2-2	Artemisia hedinii	6
10-2-2	Elymus nutans	23
10-2-2	Cirsium arvense	10
10-2-2	Gentiana dahurica	9
10-2-2	Calystegia hederacea	8
10-2-2	Cirsium spicatum
10-2-2	Sanguisorba officinalis
10-2-2	Androsace umbellata	8
10-2-2	Cicuta virosa
10-2-2	Stipa breviflora	33
10-2-2	Carduus nutans
10-2-2	Oxytropis kansuensis	26
10-2-2	Tibetia himalaica	6
10-2-2	Festuca elata	50
10-2-2	Medicago ruthenica	18
10-2-2	Scutellaria baicalensis	20
10-2-2	Neotrinia splendens	17
10-2-2	Ligularia sagitta
10-2-2	Nepeta cataria	15
10-2-2	Dysphania schraderiana	16
10-2-2	Potentilla sericea	18
10-2-2	Ixeris polycephala	20
10-2-2	Stellera chamaejasme
10-2-2	Geranium wilfordii	36
10-2-2	Gentiana scabra
10-2-2	Gymnaconitum gymnandrum
10-2-2	Gentiana straminea
10-2-2	Iris lactea
10-2-2	Pedicularis sylvatica	8
10-2-2	Saussurea pulchra	24
10-2-2	Allium mongolicum	21
10-2-2	Elsholtzia densa	15
10-2-2	Taraxacum mongolicum
10-2-2	Lancea tibetica
10-2-2	Anaphalis lactea
10-2-2	Euphorbia esula
10-2-2	Carex myosuroides	66
10-2-2	Daphne tangutica
10-2-2	Clematis florida
10-2-2	Knorringia sibirica	26
10-2-2	Ajania tenuifolia	16
10-2-2	Thermopsis lupinoides	9
10-2-2	Artemisia capillaris	16
10-2-2	Kali collinum
10-2-2	Aster tataricus	12
10-2-2	Bare area	6
10-2-3	Aster altaicus	13	1268	0.988959
10-2-3	Leontopodium nanum	15
10-2-3	Artemisia argyi	12
10-2-3	Artemisia stechmanniana	13
10-2-3	Gentianopsis barbata	10
10-2-3	Agropyron cristatum	91
10-2-3	Poa pratensis	81
10-2-3	Potentilla supina	71
10-2-3	Plantago asiatica	13
10-2-3	Artemisia hedinii	9
10-2-3	Elymus nutans	68
10-2-3	Cirsium arvense	15
10-2-3	Gentiana dahurica	13
10-2-3	Calystegia hederacea
10-2-3	Cirsium spicatum
10-2-3	Sanguisorba officinalis
10-2-3	Androsace umbellata	12
10-2-3	Cicuta virosa
10-2-3	Stipa breviflora	72
10-2-3	Carduus nutans
10-2-3	Oxytropis kansuensis	52
10-2-3	Tibetia himalaica
10-2-3	Festuca elata	91
10-2-3	Medicago ruthenica	31
10-2-3	Scutellaria baicalensis	34
10-2-3	Neotrinia splendens	16
10-2-3	Ligularia sagitta	27
10-2-3	Nepeta cataria	25
10-2-3	Dysphania schraderiana	27
10-2-3	Potentilla sericea	31
10-2-3	Ixeris polycephala	34
10-2-3	Stellera chamaejasme
10-2-3	Geranium wilfordii	46
10-2-3	Gentiana scabra
10-2-3	Gymnaconitum gymnandrum
10-2-3	Gentiana straminea
10-2-3	Iris lactea
10-2-3	Pedicularis sylvatica	12
10-2-3	Saussurea pulchra	42
10-2-3	Allium mongolicum	31
10-2-3	Elsholtzia densa	25
10-2-3	Taraxacum mongolicum
10-2-3	Lancea tibetica
10-2-3	Anaphalis lactea
10-2-3	Euphorbia esula
10-2-3	Carex myosuroides	90
10-2-3	Daphne tangutica
10-2-3	Clematis florida
10-2-3	Knorringia sibirica	46
10-2-3	Ajania tenuifolia	27
10-2-3	Thermopsis lupinoides	13
10-2-3	Artemisia capillaris	27
10-2-3	Kali collinum
10-2-3	Aster tataricus	19
10-2-3	Bare area	14
10-3-1	Aster altaicus	14	933	0.98821	0.988695
10-3-1	Leontopodium nanum	12
10-3-1	Artemisia argyi	15
10-3-1	Artemisia stechmanniana	12
10-3-1	Gentianopsis barbata
10-3-1	Agropyron cristatum	84
10-3-1	Poa pratensis	75
10-3-1	Potentilla supina	46
10-3-1	Plantago asiatica
10-3-1	Artemisia hedinii
10-3-1	Elymus nutans	37
10-3-1	Cirsium arvense	15
10-3-1	Gentiana dahurica	9
10-3-1	Calystegia hederacea	11
10-3-1	Cirsium spicatum	7
10-3-1	Sanguisorba officinalis	8
10-3-1	Androsace umbellata	13
10-3-1	Cicuta virosa	9
10-3-1	Stipa breviflora	50
10-3-1	Carduus nutans
10-3-1	Oxytropis kansuensis	37
10-3-1	Tibetia himalaica	9
10-3-1	Festuca elata	82
10-3-1	Medicago ruthenica	19
10-3-1	Scutellaria baicalensis	12
10-3-1	Neotrinia splendens	15
10-3-1	Ligularia sagitta	14
10-3-1	Nepeta cataria	22
10-3-1	Dysphania schraderiana	25
10-3-1	Potentilla sericea	26
10-3-1	Ixeris polycephala	19
10-3-1	Stellera chamaejasme
10-3-1	Geranium wilfordii	23
10-3-1	Gentiana scabra
10-3-1	Gymnaconitum gymnandrum
10-3-1	Gentiana straminea
10-3-1	Iris lactea
10-3-1	Pedicularis sylvatica	10
10-3-1	Saussurea pulchra	22
10-3-1	Allium mongolicum	10
10-3-1	Elsholtzia densa	8
10-3-1	Taraxacum mongolicum
10-3-1	Lancea tibetica
10-3-1	Anaphalis lactea
10-3-1	Euphorbia esula
10-3-1	Carex myosuroides	85
10-3-1	Daphne tangutica
10-3-1	Clematis florida
10-3-1	Knorringia sibirica	26
10-3-1	Ajania tenuifolia	15
10-3-1	Thermopsis lupinoides
10-3-1	Artemisia capillaris	16
10-3-1	Kali collinum
10-3-1	Aster tataricus	10
10-3-1	Bare area	11
10-3-2	Aster altaicus	12	830	0.987952
10-3-2	Leontopodium nanum	10
10-3-2	Artemisia argyi	13
10-3-2	Artemisia stechmanniana	10
10-3-2	Gentianopsis barbata
10-3-2	Agropyron cristatum	75
10-3-2	Poa pratensis	57
10-3-2	Potentilla supina	46
10-3-2	Plantago asiatica	10
10-3-2	Artemisia hedinii	7
10-3-2	Elymus nutans	40
10-3-2	Cirsium arvense	13
10-3-2	Gentiana dahurica	8
10-3-2	Calystegia hederacea	10
10-3-2	Cirsium spicatum
10-3-2	Sanguisorba officinalis
10-3-2	Androsace umbellata	11
10-3-2	Cicuta virosa	8
10-3-2	Stipa breviflora	46
10-3-2	Carduus nutans	5
10-3-2	Oxytropis kansuensis	30
10-3-2	Tibetia himalaica	6
10-3-2	Festuca elata	55
10-3-2	Medicago ruthenica	16
10-3-2	Scutellaria baicalensis	10
10-3-2	Neotrinia splendens	13
10-3-2	Ligularia sagitta	12
10-3-2	Nepeta cataria	18
10-3-2	Dysphania schraderiana	21
10-3-2	Potentilla sericea	25
10-3-2	Ixeris polycephala	19
10-3-2	Stellera chamaejasme
10-3-2	Geranium wilfordii	19
10-3-2	Gentiana scabra
10-3-2	Gymnaconitum gymnandrum
10-3-2	Gentiana straminea
10-3-2	Iris lactea
10-3-2	Pedicularis sylvatica	9
10-3-2	Saussurea pulchra	18
10-3-2	Allium mongolicum	9
10-3-2	Elsholtzia densa	7
10-3-2	Taraxacum mongolicum
10-3-2	Lancea tibetica
10-3-2	Anaphalis lactea
10-3-2	Euphorbia esula
10-3-2	Carex myosuroides	88
10-3-2	Daphne tangutica
10-3-2	Clematis florida
10-3-2	Knorringia sibirica	22
10-3-2	Ajania tenuifolia	13
10-3-2	Thermopsis lupinoides	6
10-3-2	Artemisia capillaris	14
10-3-2	Kali collinum
10-3-2	Aster tataricus	9
10-3-2	Bare area	10
10-3-3	Aster altaicus	19	1191	0.989924
10-3-3	Leontopodium nanum	16
10-3-3	Artemisia argyi	21
10-3-3	Artemisia stechmanniana	16
10-3-3	Gentianopsis barbata
10-3-3	Agropyron cristatum	87
10-3-3	Poa pratensis	78
10-3-3	Potentilla supina	67
10-3-3	Plantago asiatica
10-3-3	Artemisia hedinii	10
10-3-3	Elymus nutans	67
10-3-3	Cirsium arvense	21
10-3-3	Gentiana dahurica	12
10-3-3	Calystegia hederacea	15
10-3-3	Cirsium spicatum	9
10-3-3	Sanguisorba officinalis	10
10-3-3	Androsace umbellata	18
10-3-3	Cicuta virosa	12
10-3-3	Stipa breviflora	78
10-3-3	Carduus nutans
10-3-3	Oxytropis kansuensis	54
10-3-3	Tibetia himalaica
10-3-3	Festuca elata	76
10-3-3	Medicago ruthenica	27
10-3-3	Scutellaria baicalensis	16
10-3-3	Neotrinia splendens	21
10-3-3	Ligularia sagitta	19
10-3-3	Nepeta cataria	31
10-3-3	Dysphania schraderiana	36
10-3-3	Potentilla sericea	37
10-3-3	Ixeris polycephala	27
10-3-3	Stellera chamaejasme
10-3-3	Geranium wilfordii	33
10-3-3	Gentiana scabra
10-3-3	Gymnaconitum gymnandrum
10-3-3	Gentiana straminea
10-3-3	Iris lactea
10-3-3	Pedicularis sylvatica	14
10-3-3	Saussurea pulchra	31
10-3-3	Allium mongolicum	13
10-3-3	Elsholtzia densa	10
10-3-3	Taraxacum mongolicum
10-3-3	Lancea tibetica
10-3-3	Anaphalis lactea
10-3-3	Euphorbia esula
10-3-3	Carex myosuroides	86
10-3-3	Daphne tangutica
10-3-3	Clematis florida
10-3-3	Knorringia sibirica	35
10-3-3	Ajania tenuifolia	19
10-3-3	Thermopsis lupinoides	7
10-3-3	Artemisia capillaris	20
10-3-3	Kali collinum
10-3-3	Aster tataricus	11
10-3-3	Bare area	12
8-1-1	Aster altaicus	18	532	0.979323	0.980874	0.979992
8-1-1	Leontopodium nanum	4
8-1-1	Artemisia argyi	11
8-1-1	Artemisia stechmanniana	3
8-1-1	Gentianopsis barbata
8-1-1	Agropyron cristatum	44
8-1-1	Poa pratensis	6
8-1-1	Potentilla supina	25
8-1-1	Plantago asiatica	2
8-1-1	Artemisia hedinii	8
8-1-1	Elymus nutans	16
8-1-1	Cirsium arvense	4
8-1-1	Gentiana dahurica
8-1-1	Calystegia hederacea
8-1-1	Cirsium spicatum
8-1-1	Sanguisorba officinalis	2
8-1-1	Androsace umbellata
8-1-1	Cicuta virosa
8-1-1	Stipa breviflora	36
8-1-1	Carduus nutans
8-1-1	Oxytropis kansuensis	28
8-1-1	Tibetia himalaica
8-1-1	Festuca elata
8-1-1	Medicago ruthenica	32
8-1-1	Scutellaria baicalensis
8-1-1	Neotrinia splendens
8-1-1	Ligularia sagitta
8-1-1	Nepeta cataria	11
8-1-1	Dysphania schraderiana
8-1-1	Potentilla sericea	12
8-1-1	Ixeris polycephala
8-1-1	Stellera chamaejasme
8-1-1	Geranium wilfordii	29
8-1-1	Gentiana scabra
8-1-1	Gymnaconitum gymnandrum	9
8-1-1	Gentiana straminea	15
8-1-1	Iris lactea
8-1-1	Pedicularis sylvatica
8-1-1	Saussurea pulchra	10
8-1-1	Allium mongolicum	28
8-1-1	Elsholtzia densa
8-1-1	Taraxacum mongolicum	20
8-1-1	Lancea tibetica	3
8-1-1	Anaphalis lactea
8-1-1	Euphorbia esula
8-1-1	Carex myosuroides	76
8-1-1	Daphne tangutica
8-1-1	Clematis florida	9
8-1-1	Knorringia sibirica	22
8-1-1	Ajania tenuifolia	16
8-1-1	Thermopsis lupinoides	4
8-1-1	Artemisia capillaris	18
8-1-1	Kali collinum
8-1-1	Aster tataricus
8-1-1	Bare area	11
8-1-2	Aster altaicus	14	389	0.982005
8-1-2	Leontopodium nanum	3
8-1-2	Artemisia argyi	9
8-1-2	Artemisia stechmanniana
8-1-2	Gentianopsis barbata
8-1-2	Agropyron cristatum	35
8-1-2	Poa pratensis	5
8-1-2	Potentilla supina	20
8-1-2	Plantago asiatica
8-1-2	Artemisia hedinii	6
8-1-2	Elymus nutans	13
8-1-2	Cirsium arvense	3
8-1-2	Gentiana dahurica
8-1-2	Calystegia hederacea
8-1-2	Cirsium spicatum
8-1-2	Sanguisorba officinalis
8-1-2	Androsace umbellata
8-1-2	Cicuta virosa
8-1-2	Stipa breviflora	29
8-1-2	Carduus nutans
8-1-2	Oxytropis kansuensis	22
8-1-2	Tibetia himalaica
8-1-2	Festuca elata
8-1-2	Medicago ruthenica	26
8-1-2	Scutellaria baicalensis
8-1-2	Neotrinia splendens
8-1-2	Ligularia sagitta
8-1-2	Nepeta cataria	7
8-1-2	Dysphania schraderiana
8-1-2	Potentilla sericea	9
8-1-2	Ixeris polycephala
8-1-2	Stellera chamaejasme
8-1-2	Geranium wilfordii	15
8-1-2	Gentiana scabra
8-1-2	Gymnaconitum gymnandrum	7
8-1-2	Gentiana straminea	10
8-1-2	Iris lactea
8-1-2	Pedicularis sylvatica
8-1-2	Saussurea pulchra	6
8-1-2	Allium mongolicum	19
8-1-2	Elsholtzia densa
8-1-2	Taraxacum mongolicum	15
8-1-2	Lancea tibetica	2
8-1-2	Anaphalis lactea
8-1-2	Euphorbia esula
8-1-2	Carex myosuroides	56
8-1-2	Daphne tangutica
8-1-2	Clematis florida	7
8-1-2	Knorringia sibirica	18
8-1-2	Ajania tenuifolia	13
8-1-2	Thermopsis lupinoides	3
8-1-2	Artemisia capillaris	10
8-1-2	Kali collinum
8-1-2	Aster tataricus
8-1-2	Bare area	7
8-1-3	Aster altaicus	32	695	0.981295
8-1-3	Leontopodium nanum	6
8-1-3	Artemisia argyi	9
8-1-3	Artemisia stechmanniana	5
8-1-3	Gentianopsis barbata	3
8-1-3	Agropyron cristatum	62
8-1-3	Poa pratensis	9
8-1-3	Potentilla supina	35
8-1-3	Plantago asiatica	3
8-1-3	Artemisia hedinii	11
8-1-3	Elymus nutans	21
8-1-3	Cirsium arvense	6
8-1-3	Gentiana dahurica
8-1-3	Calystegia hederacea
8-1-3	Cirsium spicatum	2
8-1-3	Sanguisorba officinalis	3
8-1-3	Androsace umbellata
8-1-3	Cicuta virosa
8-1-3	Stipa breviflora	49
8-1-3	Carduus nutans
8-1-3	Oxytropis kansuensis	28
8-1-3	Tibetia himalaica
8-1-3	Festuca elata
8-1-3	Medicago ruthenica	41
8-1-3	Scutellaria baicalensis
8-1-3	Neotrinia splendens	5
8-1-3	Ligularia sagitta
8-1-3	Nepeta cataria	16
8-1-3	Dysphania schraderiana
8-1-3	Potentilla sericea	18
8-1-3	Ixeris polycephala
8-1-3	Stellera chamaejasme
8-1-3	Geranium wilfordii	37
8-1-3	Gentiana scabra
8-1-3	Gymnaconitum gymnandrum	13
8-1-3	Gentiana straminea	21
8-1-3	Iris lactea
8-1-3	Pedicularis sylvatica
8-1-3	Saussurea pulchra	15
8-1-3	Allium mongolicum	39
8-1-3	Elsholtzia densa
8-1-3	Taraxacum mongolicum	28
8-1-3	Lancea tibetica	5
8-1-3	Anaphalis lactea
8-1-3	Euphorbia esula
8-1-3	Carex myosuroides	64
8-1-3	Daphne tangutica
8-1-3	Clematis florida	14
8-1-3	Knorringia sibirica	28
8-1-3	Ajania tenuifolia	24
8-1-3	Thermopsis lupinoides	6
8-1-3	Artemisia capillaris	24
8-1-3	Kali collinum
8-1-3	Aster tataricus
8-1-3	Bare area	13
8-2-1	Aster altaicus	25	562	0.97153	0.981203
8-2-1	Leontopodium nanum	10
8-2-1	Artemisia argyi	15
8-2-1	Artemisia stechmanniana	4
8-2-1	Gentianopsis barbata
8-2-1	Agropyron cristatum	51
8-2-1	Poa pratensis	7
8-2-1	Potentilla supina	20
8-2-1	Plantago asiatica	2
8-2-1	Artemisia hedinii	10
8-2-1	Elymus nutans	15
8-2-1	Cirsium arvense	6
8-2-1	Gentiana dahurica
8-2-1	Calystegia hederacea	1
8-2-1	Cirsium spicatum
8-2-1	Sanguisorba officinalis	1
8-2-1	Androsace umbellata
8-2-1	Cicuta virosa
8-2-1	Stipa breviflora	47
8-2-1	Carduus nutans
8-2-1	Oxytropis kansuensis	30
8-2-1	Tibetia himalaica
8-2-1	Festuca elata
8-2-1	Medicago ruthenica	28
8-2-1	Scutellaria baicalensis
8-2-1	Neotrinia splendens
8-2-1	Ligularia sagitta
8-2-1	Nepeta cataria	7
8-2-1	Dysphania schraderiana
8-2-1	Potentilla sericea	10
8-2-1	Ixeris polycephala
8-2-1	Stellera chamaejasme
8-2-1	Geranium wilfordii	25
8-2-1	Gentiana scabra
8-2-1	Gymnaconitum gymnandrum	10
8-2-1	Gentiana straminea	10
8-2-1	Iris lactea
8-2-1	Pedicularis sylvatica
8-2-1	Saussurea pulchra	13
8-2-1	Allium mongolicum	20
8-2-1	Elsholtzia densa
8-2-1	Taraxacum mongolicum	28
8-2-1	Lancea tibetica	2
8-2-1	Anaphalis lactea
8-2-1	Euphorbia esula
8-2-1	Carex myosuroides	79
8-2-1	Daphne tangutica
8-2-1	Clematis florida	8
8-2-1	Knorringia sibirica	28
8-2-1	Ajania tenuifolia	15
8-2-1	Thermopsis lupinoides	3
8-2-1	Artemisia capillaris	14
8-2-1	Kali collinum	2
8-2-1	Aster tataricus
8-2-1	Bare area	16
8-2-2	Aster altaicus	23	430	0.986047
8-2-2	Leontopodium nanum	8
8-2-2	Artemisia argyi	12
8-2-2	Artemisia stechmanniana	3
8-2-2	Gentianopsis barbata
8-2-2	Agropyron cristatum	43
8-2-2	Poa pratensis	6
8-2-2	Potentilla supina	16
8-2-2	Plantago asiatica
8-2-2	Artemisia hedinii	8
8-2-2	Elymus nutans	12
8-2-2	Cirsium arvense	5
8-2-2	Gentiana dahurica
8-2-2	Calystegia hederacea
8-2-2	Cirsium spicatum
8-2-2	Sanguisorba officinalis
8-2-2	Androsace umbellata
8-2-2	Cicuta virosa
8-2-2	Stipa breviflora	33
8-2-2	Carduus nutans
8-2-2	Oxytropis kansuensis	22
8-2-2	Tibetia himalaica
8-2-2	Festuca elata
8-2-2	Medicago ruthenica	27
8-2-2	Scutellaria baicalensis
8-2-2	Neotrinia splendens
8-2-2	Ligularia sagitta
8-2-2	Nepeta cataria	6
8-2-2	Dysphania schraderiana
8-2-2	Potentilla sericea	8
8-2-2	Ixeris polycephala
8-2-2	Stellera chamaejasme
8-2-2	Geranium wilfordii	20
8-2-2	Gentiana scabra
8-2-2	Gymnaconitum gymnandrum	7
8-2-2	Gentiana straminea	8
8-2-2	Iris lactea
8-2-2	Pedicularis sylvatica
8-2-2	Saussurea pulchra	8
8-2-2	Allium mongolicum	14
8-2-2	Elsholtzia densa
8-2-2	Taraxacum mongolicum	18
8-2-2	Lancea tibetica
8-2-2	Anaphalis lactea
8-2-2	Euphorbia esula
8-2-2	Carex myosuroides	63
8-2-2	Daphne tangutica
8-2-2	Clematis florida	6
8-2-2	Knorringia sibirica	22
8-2-2	Ajania tenuifolia	12
8-2-2	Thermopsis lupinoides	2
8-2-2	Artemisia capillaris	12
8-2-2	Kali collinum
8-2-2	Aster tataricus
8-2-2	Bare area	6
8-2-3	Aster altaicus	43	716	0.986034
8-2-3	Leontopodium nanum	14
8-2-3	Artemisia argyi	23
8-2-3	Artemisia stechmanniana	6
8-2-3	Gentianopsis barbata
8-2-3	Agropyron cristatum	52
8-2-3	Poa pratensis	11
8-2-3	Potentilla supina	28
8-2-3	Plantago asiatica	3
8-2-3	Artemisia hedinii	15
8-2-3	Elymus nutans	21
8-2-3	Cirsium arvense	9
8-2-3	Gentiana dahurica
8-2-3	Calystegia hederacea	1
8-2-3	Cirsium spicatum
8-2-3	Sanguisorba officinalis	2
8-2-3	Androsace umbellata
8-2-3	Cicuta virosa
8-2-3	Stipa breviflora	65
8-2-3	Carduus nutans
8-2-3	Oxytropis kansuensis	37
8-2-3	Tibetia himalaica
8-2-3	Festuca elata
8-2-3	Medicago ruthenica	29
8-2-3	Scutellaria baicalensis
8-2-3	Neotrinia splendens
8-2-3	Ligularia sagitta
8-2-3	Nepeta cataria	11
8-2-3	Dysphania schraderiana
8-2-3	Potentilla sericea	15
8-2-3	Ixeris polycephala
8-2-3	Stellera chamaejasme
8-2-3	Geranium wilfordii	35
8-2-3	Gentiana scabra
8-2-3	Gymnaconitum gymnandrum	15
8-2-3	Gentiana straminea	15
8-2-3	Iris lactea
8-2-3	Pedicularis sylvatica
8-2-3	Saussurea pulchra	18
8-2-3	Allium mongolicum	25
8-2-3	Elsholtzia densa
8-2-3	Taraxacum mongolicum	38
8-2-3	Lancea tibetica	3
8-2-3	Anaphalis lactea
8-2-3	Euphorbia esula
8-2-3	Carex myosuroides	68
8-2-3	Daphne tangutica
8-2-3	Clematis florida	12
8-2-3	Knorringia sibirica	41
8-2-3	Ajania tenuifolia	23
8-2-3	Thermopsis lupinoides	5
8-2-3	Artemisia capillaris	23
8-2-3	Kali collinum
8-2-3	Aster tataricus
8-2-3	Bare area	10
8-3-1	Aster altaicus	21	585	0.969231	0.977897
8-3-1	Leontopodium nanum	12
8-3-1	Artemisia argyi	11
8-3-1	Artemisia stechmanniana	17
8-3-1	Gentianopsis barbata
8-3-1	Agropyron cristatum	49
8-3-1	Poa pratensis	12
8-3-1	Potentilla supina	32
8-3-1	Plantago asiatica	1
8-3-1	Artemisia hedinii	11
8-3-1	Elymus nutans	12
8-3-1	Cirsium arvense	7
8-3-1	Gentiana dahurica
8-3-1	Calystegia hederacea
8-3-1	Cirsium spicatum	1
8-3-1	Sanguisorba officinalis	3
8-3-1	Androsace umbellata
8-3-1	Cicuta virosa
8-3-1	Stipa breviflora	57
8-3-1	Carduus nutans
8-3-1	Oxytropis kansuensis	21
8-3-1	Tibetia himalaica
8-3-1	Festuca elata
8-3-1	Medicago ruthenica	28
8-3-1	Scutellaria baicalensis
8-3-1	Neotrinia splendens	6
8-3-1	Ligularia sagitta
8-3-1	Nepeta cataria	5
8-3-1	Dysphania schraderiana
8-3-1	Potentilla sericea	14
8-3-1	Ixeris polycephala
8-3-1	Stellera chamaejasme
8-3-1	Geranium wilfordii	21
8-3-1	Gentiana scabra
8-3-1	Gymnaconitum gymnandrum	12
8-3-1	Gentiana straminea	6
8-3-1	Iris lactea
8-3-1	Pedicularis sylvatica
8-3-1	Saussurea pulchra	17
8-3-1	Allium mongolicum	15
8-3-1	Elsholtzia densa
8-3-1	Taraxacum mongolicum	31
8-3-1	Lancea tibetica	2
8-3-1	Anaphalis lactea
8-3-1	Euphorbia esula
8-3-1	Carex myosuroides	75
8-3-1	Daphne tangutica
8-3-1	Clematis florida	10
8-3-1	Knorringia sibirica	20
8-3-1	Ajania tenuifolia	13
8-3-1	Thermopsis lupinoides	3
8-3-1	Artemisia capillaris	19
8-3-1	Kali collinum	3
8-3-1	Aster tataricus
8-3-1	Bare area	18
8-3-2	Aster altaicus	20	460	0.978261
8-3-2	Leontopodium nanum	10
8-3-2	Artemisia argyi	9
8-3-2	Artemisia stechmanniana	14
8-3-2	Gentianopsis barbata
8-3-2	Agropyron cristatum	38
8-3-2	Poa pratensis	11
8-3-2	Potentilla supina	28
8-3-2	Plantago asiatica	1
8-3-2	Artemisia hedinii	9
8-3-2	Elymus nutans	10
8-3-2	Cirsium arvense	6
8-3-2	Gentiana dahurica
8-3-2	Calystegia hederacea
8-3-2	Cirsium spicatum
8-3-2	Sanguisorba officinalis
8-3-2	Androsace umbellata
8-3-2	Cicuta virosa
8-3-2	Stipa breviflora	40
8-3-2	Carduus nutans
8-3-2	Oxytropis kansuensis	18
8-3-2	Tibetia himalaica
8-3-2	Festuca elata
8-3-2	Medicago ruthenica	22
8-3-2	Scutellaria baicalensis
8-3-2	Neotrinia splendens
8-3-2	Ligularia sagitta
8-3-2	Nepeta cataria	4
8-3-2	Dysphania schraderiana
8-3-2	Potentilla sericea	12
8-3-2	Ixeris polycephala
8-3-2	Stellera chamaejasme
8-3-2	Geranium wilfordii	17
8-3-2	Gentiana scabra
8-3-2	Gymnaconitum gymnandrum	10
8-3-2	Gentiana straminea	5
8-3-2	Iris lactea
8-3-2	Pedicularis sylvatica
8-3-2	Saussurea pulchra	14
8-3-2	Allium mongolicum	12
8-3-2	Elsholtzia densa
8-3-2	Taraxacum mongolicum	26
8-3-2	Lancea tibetica	2
8-3-2	Anaphalis lactea
8-3-2	Euphorbia esula
8-3-2	Carex myosuroides	61
8-3-2	Daphne tangutica
8-3-2	Clematis florida	8
8-3-2	Knorringia sibirica	16
8-3-2	Ajania tenuifolia	10
8-3-2	Thermopsis lupinoides	2
8-3-2	Artemisia capillaris	15
8-3-2	Kali collinum
8-3-2	Aster tataricus
8-3-2	Bare area	10
8-3-3	Aster altaicus	38	797	0.986198
8-3-3	Leontopodium nanum	18
8-3-3	Artemisia argyi	17
8-3-3	Artemisia stechmanniana	26
8-3-3	Gentianopsis barbata
8-3-3	Agropyron cristatum	68
8-3-3	Poa pratensis	21
8-3-3	Potentilla supina	50
8-3-3	Plantago asiatica	2
8-3-3	Artemisia hedinii	17
8-3-3	Elymus nutans	18
8-3-3	Cirsium arvense	11
8-3-3	Gentiana dahurica
8-3-3	Calystegia hederacea
8-3-3	Cirsium spicatum
8-3-3	Sanguisorba officinalis
8-3-3	Androsace umbellata
8-3-3	Cicuta virosa
8-3-3	Stipa breviflora	81
8-3-3	Carduus nutans
8-3-3	Oxytropis kansuensis	42
8-3-3	Tibetia himalaica
8-3-3	Festuca elata
8-3-3	Medicago ruthenica	42
8-3-3	Scutellaria baicalensis
8-3-3	Neotrinia splendens
8-3-3	Ligularia sagitta
8-3-3	Nepeta cataria	8
8-3-3	Dysphania schraderiana
8-3-3	Potentilla sericea	17
8-3-3	Ixeris polycephala
8-3-3	Stellera chamaejasme
8-3-3	Geranium wilfordii	32
8-3-3	Gentiana scabra
8-3-3	Gymnaconitum gymnandrum	18
8-3-3	Gentiana straminea	9
8-3-3	Iris lactea
8-3-3	Pedicularis sylvatica
8-3-3	Saussurea pulchra	24
8-3-3	Allium mongolicum	23
8-3-3	Elsholtzia densa
8-3-3	Taraxacum mongolicum	33
8-3-3	Lancea tibetica	3
8-3-3	Anaphalis lactea
8-3-3	Euphorbia esula
8-3-3	Carex myosuroides	81
8-3-3	Daphne tangutica
8-3-3	Clematis florida	15
8-3-3	Knorringia sibirica	28
8-3-3	Ajania tenuifolia	17
8-3-3	Thermopsis lupinoides
8-3-3	Artemisia capillaris	27
8-3-3	Kali collinum
8-3-3	Aster tataricus
8-3-3	Bare area	11
6-1-1	Aster altaicus	21	518	0.984556	0.981081	0.976592
6-1-1	Leontopodium nanum	2
6-1-1	Artemisia argyi	15
6-1-1	Artemisia stechmanniana	2
6-1-1	Gentianopsis barbata
6-1-1	Agropyron cristatum	32
6-1-1	Poa pratensis	11
6-1-1	Potentilla supina	20
6-1-1	Plantago asiatica	1
6-1-1	Artemisia hedinii	10
6-1-1	Elymus nutans	12
6-1-1	Cirsium arvense	4
6-1-1	Gentiana dahurica
6-1-1	Calystegia hederacea
6-1-1	Cirsium spicatum
6-1-1	Sanguisorba officinalis
6-1-1	Androsace umbellata	5
6-1-1	Cicuta virosa
6-1-1	Stipa breviflora	42
6-1-1	Carduus nutans
6-1-1	Oxytropis kansuensis	10
6-1-1	Tibetia himalaica
6-1-1	Festuca elata
6-1-1	Medicago ruthenica	28
6-1-1	Scutellaria baicalensis
6-1-1	Neotrinia splendens
6-1-1	Ligularia sagitta
6-1-1	Nepeta cataria
6-1-1	Dysphania schraderiana
6-1-1	Potentilla sericea	12
6-1-1	Ixeris polycephala
6-1-1	Stellera chamaejasme	12
6-1-1	Geranium wilfordii	21
6-1-1	Gentiana scabra
6-1-1	Gymnaconitum gymnandrum
6-1-1	Gentiana straminea
6-1-1	Iris lactea
6-1-1	Pedicularis sylvatica
6-1-1	Saussurea pulchra	22
6-1-1	Allium mongolicum	8
6-1-1	Elsholtzia densa
6-1-1	Taraxacum mongolicum	28
6-1-1	Lancea tibetica
6-1-1	Anaphalis lactea	5
6-1-1	Euphorbia esula
6-1-1	Carex myosuroides	80
6-1-1	Daphne tangutica	12
6-1-1	Clematis florida
6-1-1	Knorringia sibirica	45
6-1-1	Ajania tenuifolia	21
6-1-1	Thermopsis lupinoides
6-1-1	Artemisia capillaris	23
6-1-1	Kali collinum
6-1-1	Aster tataricus	6
6-1-1	Bare area	8
6-1-2	Aster altaicus	17	417	0.971223
6-1-2	Leontopodium nanum	2
6-1-2	Artemisia argyi	12
6-1-2	Artemisia stechmanniana	2
6-1-2	Gentianopsis barbata
6-1-2	Agropyron cristatum	26
6-1-2	Poa pratensis	9
6-1-2	Potentilla supina	16
6-1-2	Plantago asiatica
6-1-2	Artemisia hedinii	8
6-1-2	Elymus nutans	10
6-1-2	Cirsium arvense	3
6-1-2	Gentiana dahurica
6-1-2	Calystegia hederacea
6-1-2	Cirsium spicatum
6-1-2	Sanguisorba officinalis
6-1-2	Androsace umbellata	4
6-1-2	Cicuta virosa
6-1-2	Stipa breviflora	34
6-1-2	Carduus nutans
6-1-2	Oxytropis kansuensis	8
6-1-2	Tibetia himalaica
6-1-2	Festuca elata
6-1-2	Medicago ruthenica	22
6-1-2	Scutellaria baicalensis
6-1-2	Neotrinia splendens
6-1-2	Ligularia sagitta
6-1-2	Nepeta cataria
6-1-2	Dysphania schraderiana
6-1-2	Potentilla sericea	10
6-1-2	Ixeris polycephala
6-1-2	Stellera chamaejasme	10
6-1-2	Geranium wilfordii	17
6-1-2	Gentiana scabra
6-1-2	Gymnaconitum gymnandrum
6-1-2	Gentiana straminea
6-1-2	Iris lactea
6-1-2	Pedicularis sylvatica
6-1-2	Saussurea pulchra	18
6-1-2	Allium mongolicum	6
6-1-2	Elsholtzia densa
6-1-2	Taraxacum mongolicum	22
6-1-2	Lancea tibetica
6-1-2	Anaphalis lactea	4
6-1-2	Euphorbia esula
6-1-2	Carex myosuroides	64
6-1-2	Daphne tangutica	10
6-1-2	Clematis florida
6-1-2	Knorringia sibirica	36
6-1-2	Ajania tenuifolia	17
6-1-2	Thermopsis lupinoides
6-1-2	Artemisia capillaris	18
6-1-2	Kali collinum
6-1-2	Aster tataricus
6-1-2	Bare area	12
6-1-3	Aster altaicus	32	718	0.987465
6-1-3	Leontopodium nanum	3
6-1-3	Artemisia argyi	23
6-1-3	Artemisia stechmanniana	3
6-1-3	Gentianopsis barbata
6-1-3	Agropyron cristatum	53
6-1-3	Poa pratensis	17
6-1-3	Potentilla supina	30
6-1-3	Plantago asiatica
6-1-3	Artemisia hedinii	15
6-1-3	Elymus nutans	18
6-1-3	Cirsium arvense	6
6-1-3	Gentiana dahurica
6-1-3	Calystegia hederacea	2
6-1-3	Cirsium spicatum
6-1-3	Sanguisorba officinalis
6-1-3	Androsace umbellata	8
6-1-3	Cicuta virosa
6-1-3	Stipa breviflora	63
6-1-3	Carduus nutans
6-1-3	Oxytropis kansuensis	15
6-1-3	Tibetia himalaica
6-1-3	Festuca elata
6-1-3	Medicago ruthenica	42
6-1-3	Scutellaria baicalensis
6-1-3	Neotrinia splendens
6-1-3	Ligularia sagitta
6-1-3	Nepeta cataria
6-1-3	Dysphania schraderiana
6-1-3	Potentilla sericea	18
6-1-3	Ixeris polycephala
6-1-3	Stellera chamaejasme	18
6-1-3	Geranium wilfordii	32
6-1-3	Gentiana scabra	4
6-1-3	Gymnaconitum gymnandrum
6-1-3	Gentiana straminea
6-1-3	Iris lactea
6-1-3	Pedicularis sylvatica	1
6-1-3	Saussurea pulchra	33
6-1-3	Allium mongolicum	12
6-1-3	Elsholtzia densa
6-1-3	Taraxacum mongolicum	42
6-1-3	Lancea tibetica
6-1-3	Anaphalis lactea	8
6-1-3	Euphorbia esula
6-1-3	Carex myosuroides	69
6-1-3	Daphne tangutica	18
6-1-3	Clematis florida
6-1-3	Knorringia sibirica	48
6-1-3	Ajania tenuifolia	32
6-1-3	Thermopsis lupinoides
6-1-3	Artemisia capillaris	35
6-1-3	Kali collinum
6-1-3	Aster tataricus	9
6-1-3	Bare area	9
6-2-1	Aster altaicus	22	532	0.973684	0.974817
6-2-1	Leontopodium nanum	7
6-2-1	Artemisia argyi	17
6-2-1	Artemisia stechmanniana	3
6-2-1	Gentianopsis barbata
6-2-1	Agropyron cristatum	42
6-2-1	Poa pratensis	10
6-2-1	Potentilla supina	18
6-2-1	Plantago asiatica	1
6-2-1	Artemisia hedinii	16
6-2-1	Elymus nutans	18
6-2-1	Cirsium arvense	3
6-2-1	Gentiana dahurica
6-2-1	Calystegia hederacea	3
6-2-1	Cirsium spicatum	3
6-2-1	Sanguisorba officinalis	5
6-2-1	Androsace umbellata	3
6-2-1	Cicuta virosa
6-2-1	Stipa breviflora	38
6-2-1	Carduus nutans
6-2-1	Oxytropis kansuensis	11
6-2-1	Tibetia himalaica
6-2-1	Festuca elata
6-2-1	Medicago ruthenica	30
6-2-1	Scutellaria baicalensis
6-2-1	Neotrinia splendens
6-2-1	Ligularia sagitta
6-2-1	Nepeta cataria
6-2-1	Dysphania schraderiana
6-2-1	Potentilla sericea	8
6-2-1	Ixeris polycephala
6-2-1	Stellera chamaejasme	15
6-2-1	Geranium wilfordii	22
6-2-1	Gentiana scabra
6-2-1	Gymnaconitum gymnandrum
6-2-1	Gentiana straminea
6-2-1	Iris lactea
6-2-1	Pedicularis sylvatica	2
6-2-1	Saussurea pulchra	20
6-2-1	Allium mongolicum	10
6-2-1	Elsholtzia densa
6-2-1	Taraxacum mongolicum	25
6-2-1	Lancea tibetica
6-2-1	Anaphalis lactea	8
6-2-1	Euphorbia esula
6-2-1	Carex myosuroides	69
6-2-1	Daphne tangutica	11
6-2-1	Clematis florida
6-2-1	Knorringia sibirica	35
6-2-1	Ajania tenuifolia	18
6-2-1	Thermopsis lupinoides
6-2-1	Artemisia capillaris	20
6-2-1	Kali collinum
6-2-1	Aster tataricus	5
6-2-1	Bare area	14
6-2-2	Aster altaicus	18	402	0.975124
6-2-2	Leontopodium nanum	6
6-2-2	Artemisia argyi	14
6-2-2	Artemisia stechmanniana	2
6-2-2	Gentianopsis barbata
6-2-2	Agropyron cristatum	34
6-2-2	Poa pratensis	8
6-2-2	Potentilla supina	14
6-2-2	Plantago asiatica	1
6-2-2	Artemisia hedinii	13
6-2-2	Elymus nutans	14
6-2-2	Cirsium arvense
6-2-2	Gentiana dahurica
6-2-2	Calystegia hederacea
6-2-2	Cirsium spicatum
6-2-2	Sanguisorba officinalis
6-2-2	Androsace umbellata	2
6-2-2	Cicuta virosa
6-2-2	Stipa breviflora	30
6-2-2	Carduus nutans
6-2-2	Oxytropis kansuensis	9
6-2-2	Tibetia himalaica
6-2-2	Festuca elata
6-2-2	Medicago ruthenica	24
6-2-2	Scutellaria baicalensis
6-2-2	Neotrinia splendens
6-2-2	Ligularia sagitta
6-2-2	Nepeta cataria
6-2-2	Dysphania schraderiana
6-2-2	Potentilla sericea	6
6-2-2	Ixeris polycephala
6-2-2	Stellera chamaejasme	12
6-2-2	Geranium wilfordii	18
6-2-2	Gentiana scabra
6-2-2	Gymnaconitum gymnandrum
6-2-2	Gentiana straminea
6-2-2	Iris lactea
6-2-2	Pedicularis sylvatica
6-2-2	Saussurea pulchra	16
6-2-2	Allium mongolicum	8
6-2-2	Elsholtzia densa
6-2-2	Taraxacum mongolicum	20
6-2-2	Lancea tibetica
6-2-2	Anaphalis lactea	6
6-2-2	Euphorbia esula
6-2-2	Carex myosuroides	55
6-2-2	Daphne tangutica
6-2-2	Clematis florida
6-2-2	Knorringia sibirica	28
6-2-2	Ajania tenuifolia	14
6-2-2	Thermopsis lupinoides
6-2-2	Artemisia capillaris	16
6-2-2	Kali collinum
6-2-2	Aster tataricus	4
6-2-2	Bare area	10
6-2-3	Aster altaicus	33	739	0.975643
6-2-3	Leontopodium nanum	11
6-2-3	Artemisia argyi	26
6-2-3	Artemisia stechmanniana	5
6-2-3	Gentianopsis barbata
6-2-3	Agropyron cristatum	63
6-2-3	Poa pratensis	15
6-2-3	Potentilla supina	27
6-2-3	Plantago asiatica
6-2-3	Artemisia hedinii	22
6-2-3	Elymus nutans	27
6-2-3	Cirsium arvense	5
6-2-3	Gentiana dahurica
6-2-3	Calystegia hederacea
6-2-3	Cirsium spicatum
6-2-3	Sanguisorba officinalis
6-2-3	Androsace umbellata	5
6-2-3	Cicuta virosa
6-2-3	Stipa breviflora	57
6-2-3	Carduus nutans
6-2-3	Oxytropis kansuensis	17
6-2-3	Tibetia himalaica
6-2-3	Festuca elata
6-2-3	Medicago ruthenica	45
6-2-3	Scutellaria baicalensis
6-2-3	Neotrinia splendens
6-2-3	Ligularia sagitta
6-2-3	Nepeta cataria
6-2-3	Dysphania schraderiana
6-2-3	Potentilla sericea	12
6-2-3	Ixeris polycephala
6-2-3	Stellera chamaejasme	23
6-2-3	Geranium wilfordii	33
6-2-3	Gentiana scabra
6-2-3	Gymnaconitum gymnandrum
6-2-3	Gentiana straminea
6-2-3	Iris lactea
6-2-3	Pedicularis sylvatica
6-2-3	Saussurea pulchra	30
6-2-3	Allium mongolicum	15
6-2-3	Elsholtzia densa
6-2-3	Taraxacum mongolicum	38
6-2-3	Lancea tibetica
6-2-3	Anaphalis lactea	12
6-2-3	Euphorbia esula
6-2-3	Carex myosuroides	73
6-2-3	Daphne tangutica	17
6-2-3	Clematis florida
6-2-3	Knorringia sibirica	53
6-2-3	Ajania tenuifolia	27
6-2-3	Thermopsis lupinoides
6-2-3	Artemisia capillaris	30
6-2-3	Kali collinum
6-2-3	Aster tataricus
6-2-3	Bare area	18
6-3-1	Aster altaicus	27	470	0.968085	0.973877
6-3-1	Leontopodium nanum	6
6-3-1	Artemisia argyi	15
6-3-1	Artemisia stechmanniana	4
6-3-1	Gentianopsis barbata
6-3-1	Agropyron cristatum	45
6-3-1	Poa pratensis	12
6-3-1	Potentilla supina	13
6-3-1	Plantago asiatica	1
6-3-1	Artemisia hedinii	12
6-3-1	Elymus nutans	20
6-3-1	Cirsium arvense	2
6-3-1	Gentiana dahurica
6-3-1	Calystegia hederacea
6-3-1	Cirsium spicatum
6-3-1	Sanguisorba officinalis
6-3-1	Androsace umbellata
6-3-1	Cicuta virosa
6-3-1	Stipa breviflora	42
6-3-1	Carduus nutans
6-3-1	Oxytropis kansuensis	10
6-3-1	Tibetia himalaica
6-3-1	Festuca elata
6-3-1	Medicago ruthenica	25
6-3-1	Scutellaria baicalensis
6-3-1	Neotrinia splendens
6-3-1	Ligularia sagitta
6-3-1	Nepeta cataria
6-3-1	Dysphania schraderiana
6-3-1	Potentilla sericea	10
6-3-1	Ixeris polycephala
6-3-1	Stellera chamaejasme	10
6-3-1	Geranium wilfordii	20
6-3-1	Gentiana scabra
6-3-1	Gymnaconitum gymnandrum
6-3-1	Gentiana straminea
6-3-1	Iris lactea
6-3-1	Pedicularis sylvatica
6-3-1	Saussurea pulchra	15
6-3-1	Allium mongolicum	12
6-3-1	Elsholtzia densa
6-3-1	Taraxacum mongolicum	18
6-3-1	Lancea tibetica
6-3-1	Anaphalis lactea	7
6-3-1	Euphorbia esula
6-3-1	Carex myosuroides	55
6-3-1	Daphne tangutica	10
6-3-1	Clematis florida
6-3-1	Knorringia sibirica	35
6-3-1	Ajania tenuifolia	14
6-3-1	Thermopsis lupinoides
6-3-1	Artemisia capillaris	15
6-3-1	Kali collinum
6-3-1	Aster tataricus
6-3-1	Bare area	15
6-3-2	Aster altaicus	22	390	0.966667
6-3-2	Leontopodium nanum	5
6-3-2	Artemisia argyi	12
6-3-2	Artemisia stechmanniana	3
6-3-2	Gentianopsis barbata
6-3-2	Agropyron cristatum	36
6-3-2	Poa pratensis	10
6-3-2	Potentilla supina	10
6-3-2	Plantago asiatica	1
6-3-2	Artemisia hedinii	10
6-3-2	Elymus nutans	16
6-3-2	Cirsium arvense	2
6-3-2	Gentiana dahurica
6-3-2	Calystegia hederacea	4
6-3-2	Cirsium spicatum
6-3-2	Sanguisorba officinalis
6-3-2	Androsace umbellata	1
6-3-2	Cicuta virosa
6-3-2	Stipa breviflora	34
6-3-2	Carduus nutans
6-3-2	Oxytropis kansuensis	8
6-3-2	Tibetia himalaica
6-3-2	Festuca elata
6-3-2	Medicago ruthenica	20
6-3-2	Scutellaria baicalensis
6-3-2	Neotrinia splendens
6-3-2	Ligularia sagitta
6-3-2	Nepeta cataria
6-3-2	Dysphania schraderiana
6-3-2	Potentilla sericea	8
6-3-2	Ixeris polycephala
6-3-2	Stellera chamaejasme	8
6-3-2	Geranium wilfordii	16
6-3-2	Gentiana scabra
6-3-2	Gymnaconitum gymnandrum
6-3-2	Gentiana straminea
6-3-2	Iris lactea
6-3-2	Pedicularis sylvatica	4
6-3-2	Saussurea pulchra	12
6-3-2	Allium mongolicum	10
6-3-2	Elsholtzia densa
6-3-2	Taraxacum mongolicum	14
6-3-2	Lancea tibetica
6-3-2	Anaphalis lactea	6
6-3-2	Euphorbia esula
6-3-2	Carex myosuroides	44
6-3-2	Daphne tangutica	8
6-3-2	Clematis florida
6-3-2	Knorringia sibirica	28
6-3-2	Ajania tenuifolia	11
6-3-2	Thermopsis lupinoides
6-3-2	Artemisia capillaris	12
6-3-2	Kali collinum
6-3-2	Aster tataricus	2
6-3-2	Bare area	13
6-3-3	Aster altaicus	41	686	0.98688
6-3-3	Leontopodium nanum	9
6-3-3	Artemisia argyi	23
6-3-3	Artemisia stechmanniana	6
6-3-3	Gentianopsis barbata
6-3-3	Agropyron cristatum	68
6-3-3	Poa pratensis	18
6-3-3	Potentilla supina	20
6-3-3	Plantago asiatica	2
6-3-3	Artemisia hedinii	18
6-3-3	Elymus nutans	30
6-3-3	Cirsium arvense	3
6-3-3	Gentiana dahurica
6-3-3	Calystegia hederacea
6-3-3	Cirsium spicatum
6-3-3	Sanguisorba officinalis
6-3-3	Androsace umbellata	2
6-3-3	Cicuta virosa
6-3-3	Stipa breviflora	63
6-3-3	Carduus nutans
6-3-3	Oxytropis kansuensis	15
6-3-3	Tibetia himalaica
6-3-3	Festuca elata
6-3-3	Medicago ruthenica	38
6-3-3	Scutellaria baicalensis
6-3-3	Neotrinia splendens
6-3-3	Ligularia sagitta
6-3-3	Nepeta cataria
6-3-3	Dysphania schraderiana
6-3-3	Potentilla sericea	15
6-3-3	Ixeris polycephala
6-3-3	Stellera chamaejasme	15
6-3-3	Geranium wilfordii	30
6-3-3	Gentiana scabra
6-3-3	Gymnaconitum gymnandrum
6-3-3	Gentiana straminea
6-3-3	Iris lactea
6-3-3	Pedicularis sylvatica
6-3-3	Saussurea pulchra	23
6-3-3	Allium mongolicum	18
6-3-3	Elsholtzia densa
6-3-3	Taraxacum mongolicum	27
6-3-3	Lancea tibetica
6-3-3	Anaphalis lactea	11
6-3-3	Euphorbia esula
6-3-3	Carex myosuroides	65
6-3-3	Daphne tangutica	15
6-3-3	Clematis florida
6-3-3	Knorringia sibirica	53
6-3-3	Ajania tenuifolia	21
6-3-3	Thermopsis lupinoides
6-3-3	Artemisia capillaris	23
6-3-3	Kali collinum
6-3-3	Aster tataricus	5
6-3-3	Bare area	9
4-1-1	Aster altaicus	22	262	0.908397	0.908759	0.898432
4-1-1	Leontopodium nanum
4-1-1	Artemisia argyi
4-1-1	Artemisia stechmanniana	10
4-1-1	Gentianopsis barbata
4-1-1	Agropyron cristatum	28
4-1-1	Poa pratensis	7
4-1-1	Potentilla supina
4-1-1	Plantago asiatica	1
4-1-1	Artemisia hedinii	7
4-1-1	Elymus nutans	2
4-1-1	Cirsium arvense
4-1-1	Gentiana dahurica
4-1-1	Calystegia hederacea
4-1-1	Cirsium spicatum
4-1-1	Sanguisorba officinalis
4-1-1	Androsace umbellata
4-1-1	Cicuta virosa
4-1-1	Stipa breviflora
[truncated: 971 more rows]

## Sheet: α Diversity
Treatment	Species	Plants per	Coverage	Requency	Total density	Total coverage	Total requency	Relative density	Relative coverage	Relative requency	Pi	LnPi	Pi*LnPi	Pi2	LnS	Quadrat(S)	Quadrat(H)	Quadrat(J)	Quadrat(D)	Plot(S)	Plot(H)	Plot(J)	Plot(D)	S	H	J	D
CK-1-1	Aster altaicus	5	4	2	840	765	186	0.00595238	0.00522876	0.0107527	0.00731128	-4.91834	-0.0359593	5.34548e-05	3.78419	44	3.56036	0.940851	0.0338652	44	3.57056	0.943723	0.0328981	44	3.57096	0.943745	0.0334903		Artificial afforestation	Richness index	Diversity index	Evenness index	Dominant index
CK-1-1	Leontopodium nanum	8	5	3	840	765	186	0.00952381	0.00653595	0.016129	0.0107296	-4.53475	-0.048656	0.000115124															（year）	（S）	（H）	（J）	（D）
CK-1-1	Artemisia argyi	5	6	2	840	765	186	0.00595238	0.00784314	0.0107527	0.00818274	-4.80573	-0.039324	6.69572e-05															CK	44±1.2247a	3.5701±0.0367a	0.9437±0.0077ao	0.0335±0.0023e
CK-1-1	Artemisia stechmanniana	6	7	2	840	765	186	0.00714286	0.00915033	0.0107527	0.00901529	-4.70883	-0.0424515	8.12755e-05															10	38±1.8708b	3.3937±0.0277b	0.9334±0.0135ab	0.0405±0.0019d
CK-1-1	Gentianopsis barbata	5	6	2	840	765	186	0.00595238	0.00784314	0.0107527	0.00818274	-4.80573	-0.039324	6.69572e-05															8	30±2.3979c	3.1618±0.0631c	0.9305±0.0122bc	0.0492±0.0043c
CK-1-1	Agropyron cristatum	56	12	10	840	765	186	0.0666667	0.0156863	0.0537634	0.0453721	-3.09286	-0.14033	0.00205863															6	28±2.2361d	3.1102±0.0565c	0.9343±0.0103ab	0.0507±0.0033c
CK-1-1	Poa pratensis	26	32	9	840	765	186	0.0309524	0.0418301	0.0483871	0.0403898	-3.20918	-0.129618	0.00163134															4	19±1.8708e	2.7101±0.0863d	0.9219±0.0094co	0.0684±0.0055b
CK-1-1	Potentilla supina	42	44	7	840	765	186	0.05	0.0575163	0.0376344	0.0483836	-3.02859	-0.146534	0.00234097															2	15±1.5000f	2.4581±0.0779e	0.9095±0.0136d	0.0828±0.0052a
CK-1-1	Plantago asiatica	3	3	3	840	765	186	0.00357143	0.00392157	0.016129	0.00787401	-4.84419	-0.0381432	6.2e-05
CK-1-1	Artemisia hedinii	4	7	1	840	765	186	0.0047619	0.00915033	0.00537634	0.00642953	-5.04685	-0.0324489	4.13388e-05
CK-1-1	Elymus nutans	32	19	6	840	765	186	0.0380952	0.0248366	0.0322581	0.03173	-3.45049	-0.109484	0.00100679
CK-1-1	Cirsium arvense	5	4	1	840	765	186	0.00595238	0.00522876	0.00537634	0.00551916	-5.19953	-0.028697	3.04611e-05
CK-1-1	Gentiana dahurica	12	6	4	840	765	186	0.0142857	0.00784314	0.0215054	0.0145447	-4.23053	-0.0615319	0.00021155
CK-1-1	Calystegia hederacea				840	765	186	0	0	0	0		0	0
CK-1-1	Cirsium spicatum	2	3	1	840	765	186	0.00238095	0.00392157	0.00537634	0.00389296	-5.54859	-0.0216004	1.51551e-05
CK-1-1	Sanguisorba officinalis	4	3	1	840	765	186	0.0047619	0.00392157	0.00537634	0.00468661	-5.36305	-0.0251345	2.19643e-05
CK-1-1	Androsace umbellata				840	765	186	0	0	0	0		0	0
CK-1-1	Cicuta virosa				840	765	186	0	0	0	0		0	0
CK-1-1	Stipa breviflora	43	24	6	840	765	186	0.0511905	0.0313725	0.0322581	0.0382737	-3.26299	-0.124887	0.00146488
CK-1-1	Carduus nutans				840	765	186	0	0	0	0		0	0
CK-1-1	Oxytropis kansuensis	22	16	8	840	765	186	0.0261905	0.020915	0.0430108	0.0300388	-3.50527	-0.105294	0.000902327
CK-1-1	Tibetia himalaica				840	765	186	0	0	0	0		0	0
CK-1-1	Festuca elata	48	36	3	840	765	186	0.0571429	0.0470588	0.016129	0.0401102	-3.21612	-0.128999	0.00160883
CK-1-1	Medicago ruthenica	32	24	8	840	765	186	0.0380952	0.0313725	0.0430108	0.0374928	-3.28361	-0.123112	0.00140571
CK-1-1	Scutellaria baicalensis				840	765	186	0	0	0	0		0	0
CK-1-1	Neotrinia splendens				840	765	186	0	0	0	0		0	0
CK-1-1	Ligularia sagitta	36	64	3	840	765	186	0.0428571	0.0836601	0.016129	0.0475488	-3.046	-0.144834	0.00226089
CK-1-1	Nepeta cataria	22	17	4	840	765	186	0.0261905	0.0222222	0.0215054	0.023306	-3.75904	-0.0876084	0.000543171
CK-1-1	Dysphania schraderiana	14	16	6	840	765	186	0.0166667	0.020915	0.0322581	0.0232799	-3.76016	-0.0875363	0.000541955
CK-1-1	Potentilla sericea	22	24	5	840	765	186	0.0261905	0.0313725	0.0268817	0.0281482	-3.57027	-0.100497	0.000792324
CK-1-1	Ixeris polycephala	17	11	7	840	765	186	0.0202381	0.0143791	0.0376344	0.0240839	-3.72621	-0.0897416	0.000580032
CK-1-1	Stellera chamaejasme				840	765	186	0	0	0	0		0	0
CK-1-1	Geranium wilfordii	36	24	7	840	765	186	0.0428571	0.0313725	0.0376344	0.037288	-3.28908	-0.122643	0.0013904
CK-1-1	Gentiana scabra	7	14	2	840	765	186	0.00833333	0.0183007	0.0107527	0.0124622	-4.38505	-0.0546475	0.000155307
CK-1-1	Gymnaconitum gymnandrum	8	18	1	840	765	186	0.00952381	0.0235294	0.00537634	0.0128099	-4.35754	-0.0558195	0.000164092
CK-1-1	Gentiana straminea	21	15	8	840	765	186	0.025	0.0196078	0.0430108	0.0292062	-3.53337	-0.103196	0.000853002
CK-1-1	Iris lactea	12	8	4	840	765	186	0.0142857	0.0104575	0.0215054	0.0154162	-4.17234	-0.0643216	0.000237659
CK-1-1	Pedicularis sylvatica	6	11	3	840	765	186	0.00714286	0.0143791	0.016129	0.0125503	-4.37801	-0.0549454	0.000157511
CK-1-1	Saussurea pulchra	14	32	6	840	765	186	0.0166667	0.0418301	0.0322581	0.0302516	-3.49821	-0.105826	0.000915159
CK-1-1	Allium mongolicum	27	18	5	840	765	186	0.0321429	0.0235294	0.0268817	0.027518	-3.59292	-0.0988698	0.00075724
CK-1-1	Elsholtzia densa	16	22	2	840	765	186	0.0190476	0.0287582	0.0107527	0.0195195	-3.93634	-0.0768354	0.000381011
CK-1-1	Taraxacum mongolicum	19	26	4	840	765	186	0.022619	0.0339869	0.0215054	0.0260371	-3.64823	-0.0949894	0.000677931
CK-1-1	Lancea tibetica	6	4	1	840	765	186	0.00714286	0.00522876	0.00537634	0.00591599	-5.1301	-0.0303496	3.49989e-05
CK-1-1	Anaphalis lactea	15	7	3	840	765	186	0.0178571	0.00915033	0.016129	0.0143788	-4.242	-0.060995	0.000206751
CK-1-1	Euphorbia esula	7	10	3	840	765	186	0.00833333	0.0130719	0.016129	0.0125114	-4.38111	-0.054814	0.000156536
CK-1-1	Carex myosuroides	92	72	10	840	765	186	0.109524	0.0941176	0.0537634	0.0858016	-2.45572	-0.210705	0.00736192
CK-1-1	Daphne tangutica				840	765	186	0	0	0	0		0	0
CK-1-1	Clematis florida	8	12	4	840	765	186	0.00952381	0.0156863	0.0215054	0.0155718	-4.16229	-0.0648145	0.000242482
CK-1-1	Knorringia sibirica	32	24	7	840	765	186	0.0380952	0.0313725	0.0376344	0.0357007	-3.33258	-0.118976	0.00127454
CK-1-1	Ajania tenuifolia	8	14	3	840	765	186	0.00952381	0.0183007	0.016129	0.0146512	-4.22324	-0.0618753	0.000214657
CK-1-1	Thermopsis lupinoides	7	11	2	840	765	186	0.00833333	0.0143791	0.0107527	0.011155	-4.49586	-0.0501515	0.000124435
CK-1-1	Artemisia capillaris	12	8	4	840	765	186	0.0142857	0.0104575	0.0215054	0.0154162	-4.17234	-0.0643216	0.000237659
CK-1-1	Kali collinum				840	765	186	0	0	0	0		0	0
CK-1-1	Aster tataricus	16	20	3	840	765	186	0.0190476	0.0261438	0.016129	0.0204401	-3.89025	-0.0795174	0.0004178
CK-1-1	Bare area		2
CK-1-2	Aster altaicus	4	3	2	672	611	147	0.00595238	0.00490998	0.0136054	0.00815594	-4.80901	-0.039222	6.65193e-05	3.73767	42	3.53448	0.945637	0.0342606
CK-1-2	Leontopodium nanum	6	4	2	672	611	147	0.00892857	0.00654664	0.0136054	0.00969355	-4.63629	-0.0449422	9.3965e-05
CK-1-2	Artemisia argyi	4	5	2	672	611	147	0.00595238	0.00818331	0.0136054	0.00924704	-4.68345	-0.0433081	8.55078e-05
CK-1-2	Artemisia stechmanniana	5	6	2	672	611	147	0.00744048	0.00981997	0.0136054	0.0102886	-4.57672	-0.0470881	0.000105856
CK-1-2	Gentianopsis barbata	4	5	2	672	611	147	0.00595238	0.00818331	0.0136054	0.00924704	-4.68345	-0.0433081	8.55078e-05
CK-1-2	Agropyron cristatum	45	10	8	672	611	147	0.0669643	0.0163666	0.0544218	0.0459176	-3.08091	-0.141468	0.00210842
CK-1-2	Poa pratensis	21	26	7	672	611	147	0.03125	0.0425532	0.047619	0.0404741	-3.20709	-0.129804	0.00163815
CK-1-2	Potentilla supina	34	35	6	672	611	147	0.0505952	0.0572831	0.0408163	0.0495649	-3.00447	-0.148916	0.00245668
CK-1-2	Plantago asiatica	2	2	2	672	611	147	0.00297619	0.00327332	0.0136054	0.00661832	-5.01791	-0.0332102	4.38021e-05
CK-1-2	Artemisia hedinii	3	6	1	672	611	147	0.00446429	0.00981997	0.00680272	0.00702899	-4.95771	-0.0348477	4.94067e-05
CK-1-2	Elymus nutans	26	15	5	672	611	147	0.0386905	0.0245499	0.0340136	0.032418	-3.42904	-0.111163	0.00105093
CK-1-2	Cirsium arvense	4	3	1	672	611	147	0.00595238	0.00490998	0.00680272	0.00588836	-5.13478	-0.0302354	3.46728e-05
CK-1-2	Gentiana dahurica	10	5	3	672	611	147	0.014881	0.00818331	0.0204082	0.0144908	-4.23424	-0.0613576	0.000209983
CK-1-2	Calystegia hederacea				672	611	147	0	0	0	0		0	0
CK-1-2	Cirsium spicatum				672	611	147	0	0	0	0		0	0
CK-1-2	Sanguisorba officinalis				672	611	147	0	0	0	0		0	0
CK-1-2	Androsace umbellata				672	611	147	0	0	0	0		0	0
CK-1-2	Cicuta virosa				672	611	147	0	0	0	0		0	0
CK-1-2	Stipa breviflora	34	19	5	672	611	147	0.0505952	0.0310966	0.0340136	0.0385685	-3.25532	-0.125553	0.00148753
CK-1-2	Carduus nutans				672	611	147	0	0	0	0		0	0
CK-1-2	Oxytropis kansuensis	18	13	6	672	611	147	0.0267857	0.0212766	0.0408163	0.0296262	-3.5191	-0.104257	0.000877712
CK-1-2	Tibetia himalaica				672	611	147	0	0	0	0		0	0
CK-1-2	Festuca elata	38	29	2	672	611	147	0.0565476	0.0474632	0.0136054	0.0392054	-3.23894	-0.126984	0.00153706
CK-1-2	Medicago ruthenica	26	19	6	672	611	147	0.0386905	0.0310966	0.0408163	0.0368678	-3.30042	-0.121679	0.00135923
CK-1-2	Scutellaria baicalensis				672	611	147	0	0	0	0		0	0
CK-1-2	Neotrinia splendens				672	611	147	0	0	0	0		0	0
CK-1-2	Ligularia sagitta	29	51	2	672	611	147	0.0431548	0.0834697	0.0136054	0.0467433	-3.06308	-0.143179	0.00218494
CK-1-2	Nepeta cataria	18	14	3	672	611	147	0.0267857	0.0229133	0.0204082	0.023369	-3.75634	-0.0877821	0.000546112
CK-1-2	Dysphania schraderiana	11	13	5	672	611	147	0.016369	0.0212766	0.0340136	0.0238864	-3.73445	-0.0892025	0.000570561
CK-1-2	Potentilla sericea	18	19	4	672	611	147	0.0267857	0.0310966	0.0272109	0.0283644	-3.56262	-0.101052	0.000804538
CK-1-2	Ixeris polycephala	14	9	6	672	611	147	0.0208333	0.01473	0.0408163	0.0254599	-3.67065	-0.0934543	0.000648205
CK-1-2	Stellera chamaejasme				672	611	147	0	0	0	0		0	0
CK-1-2	Geranium wilfordii	29	19	6	672	611	147	0.0431548	0.0310966	0.0408163	0.0383559	-3.26085	-0.125073	0.00147117
CK-1-2	Gentiana scabra	6	11	2	672	611	147	0.00892857	0.0180033	0.0136054	0.0135124	-4.30415	-0.0581595	0.000182586
CK-1-2	Gymnaconitum gymnandrum	6	14	1	672	611	147	0.00892857	0.0229133	0.00680272	0.0128815	-4.35196	-0.0560599	0.000165933
CK-1-2	Gentiana straminea	17	12	6	672	611	147	0.0252976	0.0196399	0.0408163	0.0285846	-3.55489	-0.101615	0.000817081
CK-1-2	Iris lactea	10	6	3	672	611	147	0.014881	0.00981997	0.0204082	0.0150364	-4.19728	-0.0631119	0.000226092
CK-1-2	Pedicularis sylvatica	5	9	2	672	611	147	0.00744048	0.01473	0.0136054	0.0119253	-4.42909	-0.0528182	0.000142213
CK-1-2	Saussurea pulchra	11	26	5	672	611	147	0.016369	0.0425532	0.0340136	0.0309786	-3.47446	-0.107634	0.000959675
CK-1-2	Allium mongolicum	22	14	4	672	611	147	0.0327381	0.0229133	0.0272109	0.0276207	-3.58919	-0.0991361	0.000762906
CK-1-2	Elsholtzia densa	13	18	2	672	611	147	0.0193452	0.0294599	0.0136054	0.0208035	-3.87263	-0.0805644	0.000432787
CK-1-2	Taraxacum mongolicum	15	21	3	672	611	147	0.0223214	0.0343699	0.0204082	0.0256998	-3.66127	-0.094094	0.000660481
CK-1-2	Lancea tibetica	5	3	1	672	611	147	0.00744048	0.00490998	0.00680272	0.00638439	-5.0539	-0.0322661	4.07605e-05
CK-1-2	Anaphalis lactea	12	6	2	672	611	147	0.0178571	0.00981997	0.0136054	0.0137609	-4.28593	-0.058978	0.000189361
CK-1-2	Euphorbia esula	6	8	2	672	611	147	0.00892857	0.0130933	0.0136054	0.0118758	-4.43326	-0.0526483	0.000141034
CK-1-2	Carex myosuroides	74	58	8	672	611	147	0.110119	0.0949264	0.0544218	0.0864891	-2.44774	-0.211702	0.00748036
CK-1-2	Daphne tangutica				672	611	147	0	0	0	0		0	0
CK-1-2	Clematis florida	6	10	3	672	611	147	0.00892857	0.0163666	0.0204082	0.0152344	-4.1842	-0.0637439	0.000232088
CK-1-2	Knorringia sibirica	26	19	6	672	611	147	0.0386905	0.0310966	0.0408163	0.0368678	-3.30042	-0.121679	0.00135923
CK-1-2	Ajania tenuifolia	6	11	2	672	611	147	0.00892857	0.0180033	0.0136054	0.0135124	-4.30415	-0.0581595	0.000182586
CK-1-2	Thermopsis lupinoides	6	9	2	672	611	147	0.00892857	0.01473	0.0136054	0.0124213	-4.38834	-0.054509	0.000154289
CK-1-2	Artemisia capillaris	10	6	3	672	611	147	0.014881	0.00981997	0.0204082	0.0150364	-4.19728	-0.0631119	0.000226092
CK-1-2	Kali collinum				672	611	147	0	0	0	0		0	0
CK-1-2	Aster tataricus	13	16	2	672	611	147	0.0193452	0.0261866	0.0136054	0.0197124	-3.92651	-0.0774009	0.000388579
CK-1-2	Bare area		4
CK-1-3	Aster altaicus	8	6	3	1228	1112	266	0.00651466	0.00539568	0.0112782	0.00772951	-4.86271	-0.0375864	5.97454e-05	3.82864	46	3.61685	0.944682	0.0305686
CK-1-3	Leontopodium nanum	12	8	5	1228	1112	266	0.00977199	0.00719424	0.018797	0.0119211	-4.42945	-0.0528038	0.000142112
CK-1-3	Artemisia argyi	8	9	3	1228	1112	266	0.00651466	0.00809353	0.0112782	0.00862879	-4.75265	-0.0410096	7.44561e-05
CK-1-3	Artemisia stechmanniana	9	11	3	1228	1112	266	0.00732899	0.00989209	0.0112782	0.00949976	-4.65649	-0.0442355	9.02454e-05
CK-1-3	Gentianopsis barbata	8	9	3	1228	1112	266	0.00651466	0.00809353	0.0112782	0.00862879	-4.75265	-0.0410096	7.44561e-05
CK-1-3	Agropyron cristatum	84	18	10	1228	1112	266	0.0684039	0.0161871	0.037594	0.0407283	-3.20083	-0.130364	0.0016588
CK-1-3	Poa pratensis	39	48	10	1228	1112	266	0.031759	0.0431655	0.037594	0.0375061	-3.28325	-0.123142	0.00140671
CK-1-3	Potentilla supina	63	66	10	1228	1112	266	0.0513029	0.0593525	0.037594	0.0494165	-3.00747	-0.148619	0.00244199
CK-1-3	Plantago asiatica	5	5	5	1228	1112	266	0.00407166	0.0044964	0.018797	0.00912169	-4.6971	-0.0428455	8.32051e-05
CK-1-3	Artemisia hedinii	6	11	2	1228	1112	266	0.00488599	0.00989209	0.0075188	0.00743229	-4.90192	-0.0364325	5.5239e-05
CK-1-3	Elymus nutans	48	29	9	1228	1112	266	0.0390879	0.0260791	0.0338346	0.0330006	-3.41123	-0.112573	0.00108904
CK-1-3	Cirsium arvense	8	6	2	1228	1112	266	0.00651466	0.00539568	0.0075188	0.00647638	-5.03959	-0.0326383	4.19435e-05
CK-1-3	Gentiana dahurica	18	9	6	1228	1112	266	0.014658	0.00809353	0.0225564	0.0151026	-4.19289	-0.0633236	0.000228089
CK-1-3	Calystegia hederacea				1228	1112	266	0	0	0	0		0	0
CK-1-3	Cirsium spicatum	3	5	2	1228	1112	266	0.002443	0.0044964	0.0075188	0.0048194	-5.33511	-0.025712	2.32266e-05
CK-1-3	Sanguisorba officinalis	6	5	2	1228	1112	266	0.00488599	0.0044964	0.0075188	0.00563373	-5.17898	-0.029177	3.17389e-05
CK-1-3	Androsace umbellata	1	1	1	1228	1112	266	0.000814332	0.000899281	0.0037594	0.00182434	-6.30654	-0.0115053	3.32821e-06
CK-1-3	Cicuta virosa				1228	1112	266	0	0	0	0		0	0
CK-1-3	Stipa breviflora	65	36	9	1228	1112	266	0.0529316	0.0323741	0.0338346	0.0397134	-3.22607	-0.128118	0.00157716
CK-1-3	Carduus nutans				1228	1112	266	0	0	0	0		0	0
CK-1-3	Oxytropis kansuensis	33	24	10	1228	1112	266	0.026873	0.0215827	0.037594	0.0286832	-3.55144	-0.101867	0.000822728
CK-1-3	Tibetia himalaica				1228	1112	266	0	0	0	0		0	0
CK-1-3	Festuca elata	72	54	5	1228	1112	266	0.0586319	0.0485612	0.018797	0.0419967	-3.17016	-0.133136	0.00176372
CK-1-3	Medicago ruthenica	48	36	10	1228	1112	266	0.0390879	0.0323741	0.037594	0.036352	-3.31451	-0.120489	0.00132147
CK-1-3	Scutellaria baicalensis				1228	1112	266	0	0	0	0		0	0
CK-1-3	Neotrinia splendens	3	2	1	1228	1112	266	0.002443	0.00179856	0.0037594	0.00266699	-5.92681	-0.0158067	7.11281e-06
CK-1-3	Ligularia sagitta	54	67	5	1228	1112	266	0.0439739	0.0602518	0.018797	0.0410076	-3.194	-0.130978	0.00168162
CK-1-3	Nepeta cataria	33	26	6	1228	1112	266	0.026873	0.0233813	0.0225564	0.0242702	-3.71851	-0.0902489	0.000589043
CK-1-3	Dysphania schraderiana	21	24	9	1228	1112	266	0.017101	0.0215827	0.0338346	0.0241728	-3.72253	-0.0899838	0.000584323
CK-1-3	Potentilla sericea	33	36	8	1228	1112	266	0.026873	0.0323741	0.0300752	0.0297741	-3.51412	-0.10463	0.000886496
CK-1-3	Ixeris polycephala	26	17	10	1228	1112	266	0.0211726	0.0152878	0.037594	0.0246848	-3.70157	-0.0913724	0.000609339
CK-1-3	Stellera chamaejasme				1228	1112	266	0	0	0	0		0	0
CK-1-3	Geranium wilfordii	54	36	10	1228	1112	266	0.0439739	0.0323741	0.037594	0.0379807	-3.27068	-0.124223	0.00144253
CK-1-3	Gentiana scabra	11	21	3	1228	1112	266	0.00895765	0.0188849	0.0112782	0.0130402	-4.33971	-0.056591	0.000170048
CK-1-3	Gymnaconitum gymnandrum	12	27	2	1228	1112	266	0.00977199	0.0242806	0.0075188	0.0138571	-4.27896	-0.059294	0.00019202
CK-1-3	Gentiana straminea	32	23	8	1228	1112	266	0.0260586	0.0206835	0.0300752	0.0256058	-3.66494	-0.0938435	0.000655655
CK-1-3	Iris lactea	18	12	6	1228	1112	266	0.014658	0.0107914	0.0225564	0.0160019	-4.13505	-0.0661687	0.000256061
CK-1-3	Pedicularis sylvatica	9	17	5	1228	1112	266	0.00732899	0.0152878	0.018797	0.0138046	-4.28275	-0.0591216	0.000190567
CK-1-3	Saussurea pulchra	21	48	9	1228	1112	266	0.017101	0.0431655	0.0338346	0.031367	-3.462	-0.108593	0.000983889
CK-1-3	Allium mongolicum	41	27	8	1228	1112	266	0.0333876	0.0242806	0.0300752	0.0292478	-3.53195	-0.103302	0.000855434
CK-1-3	Elsholtzia densa	24	33	3	1228	1112	266	0.019544	0.0296763	0.0112782	0.0201661	-3.90375	-0.0787236	0.000406673
CK-1-3	Taraxacum mongolicum	29	39	6	1228	1112	266	0.0236156	0.0350719	0.0225564	0.0270813	-3.60891	-0.0977341	0.000733398
CK-1-3	Lancea tibetica	9	6	2	1228	1112	266	0.00732899	0.00539568	0.0075188	0.00674782	-4.99854	-0.0337292	4.55331e-05
CK-1-3	Anaphalis lactea	23	11	5	1228	1112	266	0.0187296	0.00989209	0.018797	0.0158062	-4.14735	-0.065554	0.000249837
CK-1-3	Euphorbia esula	11	15	5	1228	1112	266	0.00895765	0.0134892	0.018797	0.013748	-4.28687	-0.0589356	0.000189006
CK-1-3	Carex myosuroides	95	87	10	1228	1112	266	0.0773616	0.0782374	0.037594	0.0643977	-2.74268	-0.176622	0.00414706
CK-1-3	Daphne tangutica				1228	1112	266	0	0	0	0		0	0
CK-1-3	Clematis florida	12	18	6	1228	1112	266	0.00977199	0.0161871	0.0225564	0.0161718	-4.12449	-0.0667004	0.000261527
CK-1-3	Knorringia sibirica	48	36	10	1228	1112	266	0.0390879	0.0323741	0.037594	0.036352	-3.31451	-0.120489	0.00132147
CK-1-3	Ajania tenuifolia	12	21	5	1228	1112	266	0.00977199	0.0188849	0.018797	0.015818	-4.14661	-0.0655909	0.000250208
CK-1-3	Thermopsis lupinoides	11	17	3	1228	1112	266	0.00895765	0.0152878	0.0112782	0.0118412	-4.43617	-0.0525296	0.000140214
CK-1-3	Artemisia capillaris	18	12	6	1228	1112	266	0.014658	0.0107914	0.0225564	0.0160019	-4.13505	-0.0661687	0.000256061
CK-1-3	Kali collinum				1228	1112	266	0	0	0	0		0	0
CK-1-3	Aster tataricus	24	30	5	1228	1112	266	0.019544	0.0269784	0.018797	0.0217731	-3.82708	-0.0833275	0.000474069
CK-1-3	Bare area		8
CK-2-1	Aster altaicus	10	5	3	844	771	199	0.0118483	0.00648508	0.0150754	0.0111363	-4.49755	-0.0500859	0.000124016	3.7612	43	3.54806	0.943333	0.0350109	44	3.5807	0.946278	0.0332721
CK-2-1	Leontopodium nanum	10	6	4	844	771	199	0.0118483	0.0077821	0.0201005	0.0132436	-4.32424	-0.0572687	0.000175394
CK-2-1	Artemisia argyi	7	5	2	844	771	199	0.00829384	0.00648508	0.0100503	0.00827639	-4.79435	-0.0396799	6.84987e-05
CK-2-1	Artemisia stechmanniana	5	8	1	844	771	199	0.00592417	0.0103761	0.00502513	0.00710848	-4.94647	-0.0351618	5.05304e-05
CK-2-1	Gentianopsis barbata	7	5	3	844	771	199	0.00829384	0.00648508	0.0150754	0.00995143	-4.61004	-0.0458765	9.9031e-05
CK-2-1	Agropyron cristatum	62	33	10	844	771	199	0.0734597	0.0428016	0.0502513	0.0555042	-2.8913	-0.160479	0.00308071
CK-2-1	Poa pratensis	34	32	10	844	771	199	0.0402844	0.0415045	0.0502513	0.0440134	-3.12326	-0.137465	0.00193718
CK-2-1	Potentilla supina	35	29	6	844	771	199	0.0414692	0.0376135	0.0301508	0.0364111	-3.31288	-0.120626	0.00132577
CK-2-1	Plantago asiatica				844	771	199	0	0	0	0		0	0
CK-2-1	Artemisia hedinii	4	7	1	844	771	199	0.00473934	0.00907912	0.00502513	0.00628119	-5.0702	-0.0318469	3.94534e-05
CK-2-1	Elymus nutans	36	22	8	844	771	199	0.042654	0.0285344	0.040201	0.0371298	-3.29334	-0.122281	0.00137862
CK-2-1	Cirsium arvense	4	3	1	844	771	199	0.00473934	0.00389105	0.00502513	0.00455184	-5.39222	-0.0245445	2.07192e-05
CK-2-1	Gentiana dahurica	10	7	3	844	771	199	0.0118483	0.00907912	0.0150754	0.0120009	-4.42277	-0.0530774	0.000144023
CK-2-1	Calystegia hederacea				844	771	199	0	0	0	0		0	0
CK-2-1	Cirsium spicatum	3	4	2	844	771	199	0.0035545	0.00518807	0.0100503	0.00626427	-5.07289	-0.031778	3.92411e-05
CK-2-1	Sanguisorba officinalis	6	4	2	844	771	199	0.007109	0.00518807	0.0100503	0.00744911	-4.89966	-0.0364981	5.54892e-05
CK-2-1	Androsace umbellata				844	771	199	0	0	0	0		0	0
CK-2-1	Cicuta virosa				844	771	199	0	0	0	0		0	0
CK-2-1	Stipa breviflora	46	32	8	844	771	199	0.0545024	0.0415045	0.040201	0.0454026	-3.09219	-0.140393	0.0020614
CK-2-1	Carduus nutans				844	771	199	0	0	0	0		0	0
CK-2-1	Oxytropis kansuensis	20	15	7	844	771	199	0.0236967	0.0194553	0.0351759	0.0261093	-3.64546	-0.0951804	0.000681694
CK-2-1	Tibetia himalaica				844	771	199	0	0	0	0		0	0
CK-2-1	Festuca elata	42	35	5	844	771	199	0.049763	0.0453956	0.0251256	0.0400948	-3.21651	-0.128965	0.00160759
CK-2-1	Medicago ruthenica	28	22	7	844	771	199	0.0331754	0.0285344	0.0351759	0.0322952	-3.43284	-0.110864	0.00104298
CK-2-1	Scutellaria baicalensis				844	771	199	0	0	0	0		0	0
CK-2-1	Neotrinia splendens				844	771	199	0	0	0	0		0	0
CK-2-1	Ligularia sagitta	20	38	4	844	771	199	0.0236967	0.0492866	0.0201005	0.0310279	-3.47287	-0.107756	0.000962733
CK-2-1	Nepeta cataria	18	15	5	844	771	199	0.021327	0.0194553	0.0251256	0.0219693	-3.81811	-0.0838812	0.00048265
CK-2-1	Dysphania schraderiana	10	12	4	844	771	199	0.0118483	0.0155642	0.0201005	0.0158377	-4.14536	-0.0656529	0.000250832
CK-2-1	Potentilla sericea	20	25	6	844	771	199	0.0236967	0.0324254	0.0301508	0.0287576	-3.54885	-0.102057	0.000827001
CK-2-1	Ixeris polycephala	15	13	5	844	771	199	0.0177725	0.0168612	0.0251256	0.0199198	-3.91604	-0.0780067	0.000396798
CK-2-1	Stellera chamaejasme				844	771	199	0	0	0	0		0	0
CK-2-1	Geranium wilfordii	40	38	8	844	771	199	0.0473934	0.0492866	0.040201	0.045627	-3.08726	-0.140862	0.00208182
CK-2-1	Gentiana scabra	5	12	3	844	771	199	0.00592417	0.0155642	0.0150754	0.0121879	-4.40731	-0.0537159	0.000148545
CK-2-1	Gymnaconitum gymnandrum	10	20	2	844	771	199	0.0118483	0.0259403	0.0100503	0.0159463	-4.13853	-0.0659942	0.000254285
CK-2-1	Gentiana straminea	15	19	7	844	771	199	0.0177725	0.0246433	0.0351759	0.0258639	-3.65491	-0.0945302	0.000668942
CK-2-1	Iris lactea	15	10	4	844	771	199	0.0177725	0.0129702	0.0201005	0.0169477	-4.07762	-0.0691064	0.000287225
CK-2-1	Pedicularis sylvatica	8	7	3	844	771	199	0.00947867	0.00907912	0.0150754	0.0112111	-4.49085	-0.0503472	0.000125688
CK-2-1	Saussurea pulchra	16	28	7	844	771	199	0.0189573	0.0363165	0.0351759	0.0301499	-3.50157	-0.105572	0.000909016
CK-2-1	Allium mongolicum	19	20	4	844	771	199	0.0225118	0.0259403	0.0201005	0.0228509	-3.77876	-0.0863482	0.000522163
CK-2-1	Elsholtzia densa	15	20	3	844	771	199	0.0177725	0.0259403	0.0150754	0.0195961	-3.93243	-0.0770601	0.000384006
CK-2-1	Taraxacum mongolicum	22	18	6	844	771	199	0.0260664	0.0233463	0.0301508	0.0265211	-3.62981	-0.0962668	0.000703371
CK-2-1	Lancea tibetica	7	6	2	844	771	199	0.00829384	0.0077821	0.0100503	0.00870873	-4.74343	-0.0413092	7.5842e-05
CK-2-1	Anaphalis lactea	16	8	3	844	771	199	0.0189573	0.0103761	0.0150754	0.014803	-4.21293	-0.0623638	0.000219127
CK-2-1	Euphorbia esula	10	12	4	844	771	199	0.0118483	0.0155642	0.0201005	0.0158377	-4.14536	-0.0656529	0.000250832
CK-2-1	Carex myosuroides	102	85	10	844	771	199	0.120853	0.110246	0.0502513	0.0937836	-2.36677	-0.221964	0.00879536
CK-2-1	Daphne tangutica				844	771	199	0	0	0	0		0	0
CK-2-1	Clematis florida	7	10	5	844	771	199	0.00829384	0.0129702	0.0251256	0.0154632	-4.16929	-0.0644706	0.000239111
CK-2-1	Knorringia sibirica	36	29	6	844	771	199	0.042654	0.0376135	0.0301508	0.0368061	-3.30209	-0.121537	0.00135469
CK-2-1	Ajania tenuifolia	11	15	4	844	771	199	0.0130332	0.0194553	0.0201005	0.0175296	-4.04386	-0.0708875	0.000307288
CK-2-1	Thermopsis lupinoides	10	8	3	844	771	199	0.0118483	0.0103761	0.0150754	0.0124333	-4.38738	-0.0545495	0.000154587
CK-2-1	Artemisia capillaris	15	10	6	844	771	199	0.0177725	0.0129702	0.0301508	0.0202978	-3.89724	-0.0791055	0.000412001
CK-2-1	Kali collinum				844	771	199	0	0	0	0		0	0
CK-2-1	Aster tataricus	13	18	2	844	771	199	0.0154028	0.0233463	0.0100503	0.0162665	-4.11865	-0.0669959	0.000264598
CK-2-1	Bare area		1
CK-2-2	Aster altaicus	8	4	2	682	628	166	0.0117302	0.00636943	0.0120482	0.0100493	-4.60025	-0.0462292	0.000100988	3.80666	45	3.57314	0.938654	0.0345481
CK-2-2	Leontopodium nanum	8	5	3	682	628	166	0.0117302	0.00796178	0.0180723	0.0125881	-4.375	-0.055073	0.00015846
CK-2-2	Artemisia argyi	6	4	2	682	628	166	0.00879765	0.00636943	0.0120482	0.00907176	-4.70259	-0.0426608	8.22968e-05
CK-2-2	Artemisia stechmanniana	4	6	1	682	628	166	0.0058651	0.00955414	0.0060241	0.00714778	-4.94095	-0.0353168	5.10908e-05
CK-2-2	Gentianopsis barbata	6	4	2	682	628	166	0.00879765	0.00636943	0.0120482	0.00907176	-4.70259	-0.0426608	8.22968e-05
CK-2-2	Agropyron cristatum	50	37	10	682	628	166	0.0733138	0.0589172	0.060241	0.0641573	-2.74642	-0.176203	0.00411616
CK-2-2	Poa pratensis	27	22	8	682	628	166	0.0395894	0.0350318	0.0481928	0.040938	-3.1957	-0.130825	0.00167592
CK-2-2	Potentilla supina	28	21	5	682	628	166	0.0410557	0.0334395	0.0301205	0.0348719	-3.35607	-0.117033	0.00121605
CK-2-2	Plantago asiatica	2	2	2	682	628	166	0.00293255	0.00318471	0.0120482	0.00605515	-5.10685	-0.0309227	3.66649e-05
CK-2-2	Artemisia hedinii	3	6	1	682	628	166	0.00439883	0.00955414	0.0060241	0.00665902	-5.01178	-0.0333736	4.43426e-05
CK-2-2	Elymus nutans	29	18	6	682	628	166	0.042522	0.0286624	0.0361446	0.0357763	-3.33047	-0.119152	0.00127995
CK-2-2	Cirsium arvense	3	2	1	682	628	166	0.00439883	0.00318471	0.0060241	0.00453588	-5.39574	-0.0244744	2.05742e-05
CK-2-2	Gentiana dahurica	8	6	2	682	628	166	0.0117302	0.00955414	0.0120482	0.0111108	-4.49983	-0.049997	0.000123451
CK-2-2	Calystegia hederacea				682	628	166	0	0	0	0		0	0
CK-2-2	Cirsium spicatum	2	3	2	682	628	166	0.00293255	0.00477707	0.0120482	0.00658594	-5.02282	-0.03308	4.33746e-05
CK-2-2	Sanguisorba officinalis	5	3	2	682	628	166	0.00733138	0.00477707	0.0120482	0.00805221	-4.82181	-0.0388262	6.48381e-05
CK-2-2	Androsace umbellata				682	628	166	0	0	0	0		0	0
CK-2-2	Cicuta virosa				682	628	166	0	0	0	0		0	0
CK-2-2	Stipa breviflora	37	26	6	682	628	166	0.0542522	0.0414013	0.0361446	0.0439327	-3.1251	-0.137294	0.00193008
CK-2-2	Carduus nutans				682	628	166	0	0	0	0		0	0
CK-2-2	Oxytropis kansuensis	16	12	6	682	628	166	0.0234604	0.0191083	0.0361446	0.0262378	-3.64056	-0.09552	0.00068842
CK-2-2	Tibetia himalaica				682	628	166	0	0	0	0		0	0
CK-2-2	Festuca elata	34	28	4	682	628	166	0.0498534	0.044586	0.0240964	0.0395119	-3.23115	-0.127669	0.00156119
CK-2-2	Medicago ruthenica	22	18	6	682	628	166	0.0322581	0.0286624	0.0361446	0.032355	-3.43099	-0.11101	0.00104685
CK-2-2	Scutellaria baicalensis				682	628	166	0	0	0	0		0	0
CK-2-2	Neotrinia splendens	3	3	3	682	628	166	0.00439883	0.00477707	0.0180723	0.00908273	-4.70138	-0.0427014	8.2496e-05
CK-2-2	Ligularia sagitta	16	30	3	682	628	166	0.0234604	0.0477707	0.0180723	0.0297678	-3.51433	-0.104614	0.000886122
CK-2-2	Nepeta cataria	14	12	4	682	628	166	0.0205279	0.0191083	0.0240964	0.0212442	-3.85167	-0.0818256	0.000451315
CK-2-2	Dysphania schraderiana	8	10	3	682	628	166	0.0117302	0.0159236	0.0180723	0.015242	-4.1837	-0.063768	0.000232319
CK-2-2	Potentilla sericea	16	20	5	682	628	166	0.0234604	0.0318471	0.0301205	0.028476	-3.55869	-0.101337	0.000810883
CK-2-2	Ixeris polycephala	12	10	4	682	628	166	0.0175953	0.0159236	0.0240964	0.0192051	-3.95258	-0.0759096	0.000368835
CK-2-2	Stellera chamaejasme				682	628	166	0	0	0	0		0	0
CK-2-2	Geranium wilfordii	32	30	6	682	628	166	0.0469208	0.0477707	0.0361446	0.043612	-3.13242	-0.136611	0.00190201
CK-2-2	Gentiana scabra	4	10	2	682	628	166	0.0058651	0.0159236	0.0120482	0.011279	-4.48482	-0.050584	0.000127215
CK-2-2	Gymnaconitum gymnandrum	8	16	2	682	628	166	0.0117302	0.0254777	0.0120482	0.0164187	-4.10933	-0.0674699	0.000269574
CK-2-2	Gentiana straminea	12	15	6	682	628	166	0.0175953	0.0238854	0.0361446	0.0258751	-3.65447	-0.0945598	0.00066952
CK-2-2	Iris lactea	12	8	3	682	628	166	0.0175953	0.0127389	0.0180723	0.0161355	-4.12673	-0.0665869	0.000260354
CK-2-2	Pedicularis sylvatica	6	6	2	682	628	166	0.00879765	0.00955414	0.0120482	0.0101333	-4.59193	-0.0465315	0.000102684
CK-2-2	Saussurea pulchra	13	22	6	682	628	166	0.0190616	0.0350318	0.0361446	0.0300793	-3.50392	-0.105395	0.000904766
CK-2-2	Allium mongolicum	15	16	3	682	628	166	0.0219941	0.0254777	0.0180723	0.021848	-3.82364	-0.0835391	0.000477337
CK-2-2	Elsholtzia densa	12	16	2	682	628	166	0.0175953	0.0254777	0.0120482	0.0183737	-3.99683	-0.0734368	0.000337594
CK-2-2	Taraxacum mongolicum	18	14	5	682	628	166	0.026393	0.022293	0.0301205	0.0262688	-3.63937	-0.095602	0.000690051
CK-2-2	Lancea tibetica	6	5	2	682	628	166	0.00879765	0.00796178	0.0120482	0.00960254	-4.64573	-0.0446108	9.22088e-05
CK-2-2	Anaphalis lactea	13	6	2	682	628	166	0.0190616	0.00955414	0.0120482	0.0135546	-4.30103	-0.0582989	0.000183728
CK-2-2	Euphorbia esula	8	10	3	682	628	166	0.0117302	0.0159236	0.0180723	0.015242	-4.1837	-0.063768	0.000232319
CK-2-2	Carex myosuroides	82	68	8	682	628	166	0.120235	0.10828	0.0481928	0.0922359	-2.38341	-0.219836	0.00850746
CK-2-2	Daphne tangutica				682	628	166	0	0	0	0		0	0
CK-2-2	Clematis florida	6	8	4	682	628	166	0.00879765	0.0127389	0.0240964	0.015211	-4.18574	-0.0636691	0.000231373
CK-2-2	Knorringia sibirica	29	23	5	682	628	166	0.042522	0.0366242	0.0301205	0.0364222	-3.31258	-0.120651	0.00132658
CK-2-2	Ajania tenuifolia	9	12	3	682	628	166	0.0131965	0.0191083	0.0180723	0.0167924	-4.08683	-0.0686275	0.000281983
CK-2-2	Thermopsis lupinoides	8	6	2	682	628	166	0.0117302	0.00955414	0.0120482	0.0111108	-4.49983	-0.049997	0.000123451
CK-2-2	Artemisia capillaris	12	8	5	682	628	166	0.0175953	0.0127389	0.0301205	0.0201515	-3.90447	-0.0786812	0.000406085
CK-2-2	Kali collinum				682	628	166	0	0	0	0		0	0
CK-2-2	Aster tataricus	10	14	2	682	628	166	0.0146628	0.022293	0.0120482	0.0163346	-4.11447	-0.0672084	0.000266821
CK-2-2	Bare area		3
CK-2-3	Aster altaicus	15	8	5	1187	1120	288	0.0126369	0.00714286	0.0173611	0.0123803	-4.39165	-0.0543699	0.000153272	3.78419	44	3.62088	0.956845	0.0302573
CK-2-3	Leontopodium nanum	15	9	6	1187	1120	288	0.0126369	0.00803571	0.0208333	0.0138353	-4.28053	-0.0592225	0.000191416
CK-2-3	Artemisia argyi	11	8	3	1187	1120	288	0.00926706	0.00714286	0.0104167	0.00894219	-4.71697	-0.0421801	7.99628e-05
CK-2-3	Artemisia stechmanniana	8	12	2	1187	1120	288	0.00673968	0.0107143	0.00694444	0.0081328	-4.81185	-0.0391338	6.61425e-05
CK-2-3	Gentianopsis barbata	11	8	5	1187	1120	288	0.00926706	0.00714286	0.0173611	0.011257	-4.48676	-0.0505075	0.00012672
CK-2-3	Agropyron cristatum	67	50	10	1187	1120	288	0.0564448	0.0446429	0.0347222	0.04527	-3.09511	-0.140116	0.00204937
CK-2-3	Poa pratensis	51	48	10	1187	1120	288	0.0429655	0.0428571	0.0347222	0.0401816	-3.21435	-0.129158	0.00161456
CK-2-3	Potentilla supina	53	44	9	1187	1120	288	0.0446504	0.0392857	0.03125	0.0383954	-3.25982	-0.125162	0.0014742
CK-2-3	Plantago asiatica	5	5	5	1187	1120	288	0.0042123	0.00446429	0.0173611	0.00867923	-4.74682	-0.0411988	7.53291e-05
CK-2-3	Artemisia hedinii	6	11	2	1187	1120	288	0.00505476	0.00982143	0.00694444	0.00727354	-4.92351	-0.0358114	5.29044e-05
CK-2-3	Elymus nutans	54	33	10	1187	1120	288	0.0454928	0.0294643	0.0347222	0.0365598	-3.30881	-0.120969	0.00133662
CK-2-3	Cirsium arvense	6	5	2	1187	1120	288	0.00505476	0.00446429	0.00694444	0.00548783	-5.20522	-0.0285654	3.01163e-05
CK-2-3	Gentiana dahurica	15	11	5	1187	1120	288	0.0126369	0.00982143	0.0173611	0.0132731	-4.32201	-0.0573667	0.000176176
CK-2-3	Calystegia hederacea				1187	1120	288	0	0	0	0		0	0
CK-2-3	Cirsium spicatum	5	6	3	1187	1120	288	0.0042123	0.00535714	0.0104167	0.00666204	-5.01133	-0.0333857	4.43827e-05
CK-2-3	Sanguisorba officinalis	9	6	3	1187	1120	288	0.00758214	0.00535714	0.0104167	0.00778532	-4.85552	-0.0378017	6.06112e-05
CK-2-3	Androsace umbellata				1187	1120	288	0	0	0	0		0	0
CK-2-3	Cicuta virosa				1187	1120	288	0	0	0	0		0	0
CK-2-3	Stipa breviflora	69	48	10	1187	1120	288	0.0581297	0.0428571	0.0347222	0.0452364	-3.09585	-0.140045	0.00204633
CK-2-3	Carduus nutans				1187	1120	288	0	0	0	0		0	0
CK-2-3	Oxytropis kansuensis	30	23	10	1187	1120	288	0.0252738	0.0205357	0.0347222	0.0268439	-3.61772	-0.0971137	0.000720596
CK-2-3	Tibetia himalaica				1187	1120	288	0	0	0	0		0	0
CK-2-3	Festuca elata	63	53	8	1187	1120	288	0.053075	0.0473214	0.0277778	0.0427247	-3.15298	-0.13471	0.0018254
CK-2-3	Medicago ruthenica	42	33	10	1187	1120	288	0.0353833	0.0294643	0.0347222	0.0331899	-3.40551	-0.113029	0.00110157
CK-2-3	Scutellaria baicalensis				1187	1120	288	0	0	0	0		0	0
CK-2-3	Neotrinia splendens				1187	1120	288	0	0	0	0		0	0
CK-2-3	Ligularia sagitta	30	41	6	1187	1120	288	0.0252738	0.0366071	0.0208333	0.0275714	-3.59098	-0.0990083	0.000760183
CK-2-3	Nepeta cataria	27	23	8	1187	1120	288	0.0227464	0.0205357	0.0277778	0.0236866	-3.74284	-0.0886554	0.000561057
CK-2-3	Dysphania schraderiana	15	18	6	1187	1120	288	0.0126369	0.0160714	0.0208333	0.0165139	-4.10355	-0.0677656	0.000272708
CK-2-3	Potentilla sericea	30	38	9	1187	1120	288	0.0252738	0.0339286	0.03125	0.0301508	-3.50154	-0.105574	0.00090907
CK-2-3	Ixeris polycephala	23	20	8	1187	1120	288	0.0193766	0.0178571	0.0277778	0.0216705	-3.8318	-0.0830371	0.000469611
CK-2-3	Stellera chamaejasme				1187	1120	288	0	0	0	0		0	0
CK-2-3	Geranium wilfordii	60	57	10	1187	1120	288	0.0505476	0.0508929	0.0347222	0.0453876	-3.09252	-0.140362	0.00206003
CK-2-3	Gentiana scabra	8	18	5	1187	1120	288	0.00673968	0.0160714	0.0173611	0.0133907	-4.31319	-0.0577568	0.000179312
CK-2-3	Gymnaconitum gymnandrum	15	30	3	1187	1120	288	0.0126369	0.0267857	0.0104167	0.0166131	-4.09756	-0.0680732	0.000275995
CK-2-3	Gentiana straminea	23	29	10	1187	1120	288	0.0193766	0.0258929	0.0347222	0.0266639	-3.62445	-0.0966418	0.000710963
CK-2-3	Iris lactea	23	15	6	1187	1120	288	0.0193766	0.0133929	0.0208333	0.0178676	-4.02477	-0.0719129	0.000319251
CK-2-3	Pedicularis sylvatica	12	11	5	1187	1120	288	0.0101095	0.00982143	0.0173611	0.0124307	-4.38759	-0.0545407	0.000154522
CK-2-3	Saussurea pulchra	24	42	10	1187	1120	288	0.020219	0.0375	0.0347222	0.0308138	-3.47979	-0.107226	0.000949487
CK-2-3	Allium mongolicum	29	30	6	1187	1120	288	0.0244313	0.0267857	0.0208333	0.0240168	-3.729	-0.0895587	0.000576806
CK-2-3	Elsholtzia densa	23	30	5	1187	1120	288	0.0193766	0.0267857	0.0173611	0.0211745	-3.85496	-0.0816267	0.000448358
CK-2-3	Taraxacum mongolicum	33	27	9	1187	1120	288	0.0278012	0.0241071	0.03125	0.0277194	-3.58562	-0.0993914	0.000768367
CK-2-3	Lancea tibetica	11	9	3	1187	1120	288	0.00926706	0.00803571	0.0104167	0.00923981	-4.68423	-0.0432814	8.53742e-05
CK-2-3	Anaphalis lactea	24	12	5	1187	1120	288	0.020219	0.0107143	0.0173611	0.0160981	-4.12905	-0.0664701	0.00025915
CK-2-3	Euphorbia esula	15	18	6	1187	1120	288	0.0126369	0.0160714	0.0208333	0.0165139	-4.10355	-0.0677656	0.000272708
CK-2-3	Carex myosuroides	87	90	10	1187	1120	288	0.073294	0.0803571	0.0347222	0.0627911	-2.76794	-0.173802	0.00394273
CK-2-3	Daphne tangutica				1187	1120	288	0	0	0	0		0	0
CK-2-3	Clematis florida	11	15	8	1187	1120	288	0.00926706	0.0133929	0.0277778	0.0168126	-4.08563	-0.0686899	0.000282662
CK-2-3	Knorringia sibirica	54	44	9	1187	1120	288	0.0454928	0.0392857	0.03125	0.0386762	-3.25253	-0.125795	0.00149585
CK-2-3	Ajania tenuifolia	17	23	6	1187	1120	288	0.0143218	0.0205357	0.0208333	0.0185636	-3.98655	-0.0740048	0.000344608
CK-2-3	Thermopsis lupinoides	15	12	5	1187	1120	288	0.0126369	0.0107143	0.0173611	0.0135708	-4.29984	-0.0583521	0.000184166
CK-2-3	Artemisia capillaris	23	15	9	1187	1120	288	0.0193766	0.0133929	0.03125	0.0213398	-3.84718	-0.0820981	0.000455388
CK-2-3	Kali collinum				1187	1120	288	0	0	0	0		0	0
CK-2-3	Aster tataricus	20	27	3	1187	1120	288	0.0168492	0.0241071	0.0104167	0.0171243	-4.06725	-0.069649	0.000293243
CK-2-3	Bare area		5
CK-3-1	Aster altaicus	15	7	4	845	734	204	0.0177515	0.00953678	0.0196078	0.015632	-4.15843	-0.0650048	0.000244361	3.7612	43	3.52173	0.936331	0.0360613	44	3.56163	0.941235	0.0343006
CK-3-1	Leontopodium nanum	11	5	5	845	734	204	0.0130178	0.00681199	0.0245098	0.0147798	-4.21449	-0.0622895	0.000218444
CK-3-1	Artemisia argyi	12	7	3	845	734	204	0.0142012	0.00953678	0.0147059	0.0128146	-4.35717	-0.0558354	0.000164214
CK-3-1	Artemisia stechmanniana	11	9	3	845	734	204	0.0130178	0.0122616	0.0147059	0.0133284	-4.31786	-0.0575502	0.000177646
CK-3-1	Gentianopsis barbata	13	9	2	845	734	204	0.0153846	0.0122616	0.00980392	0.0124834	-4.38336	-0.0547191	0.000155835
CK-3-1	Agropyron cristatum	76	45	10	845	734	204	0.0899408	0.0613079	0.0490196	0.0667561	-2.70671	-0.180689	0.00445638
CK-3-1	Poa pratensis	41	28	10	845	734	204	0.0485207	0.0381471	0.0490196	0.0452292	-3.09601	-0.14003	0.00204568
CK-3-1	Potentilla supina	19	22	5	845	734	204	0.0224852	0.0299728	0.0245098	0.0256559	-3.66298	-0.0939771	0.000658226
CK-3-1	Plantago asiatica	2	2	2	845	734	204	0.00236686	0.0027248	0.00980392	0.00496519	-5.3053	-0.0263419	2.46531e-05
CK-3-1	Artemisia hedinii	6	5	2	845	734	204	0.00710059	0.00681199	0.00980392	0.0079055	-4.8402	-0.0382642	6.24969e-05
CK-3-1	Elymus nutans	46	38	9	845	734	204	0.0544379	0.0517711	0.0441176	0.0501089	-2.99356	-0.150004	0.0025109
CK-3-1	Cirsium arvense	3	2	1	845	734	204	0.0035503	0.0027248	0.00490196	0.00372568	-5.5925	-0.0208359	1.38807e-05
CK-3-1	Gentiana dahurica	8	6	2	845	734	204	0.00946746	0.00817439	0.00980392	0.00914859	-4.69416	-0.0429449	8.36967e-05
CK-3-1	Calystegia hederacea				845	734	204	0	0	0	0		0	0
CK-3-1	Cirsium spicatum	4	5	1	845	734	204	0.00473373	0.00681199	0.00490196	0.00548256	-5.20618	-0.0285432	3.00585e-05
CK-3-1	Sanguisorba officinalis	5	6	2	845	734	204	0.00591716	0.00817439	0.00980392	0.00796516	-4.83268	-0.038493	6.34437e-05
CK-3-1	Androsace umbellata				845	734	204	0	0	0	0		0	0
CK-3-1	Cicuta virosa				845	734	204	0	0	0	0		0	0
CK-3-1	Stipa breviflora	51	39	9	845	734	204	0.060355	0.0531335	0.0441176	0.0525354	-2.94627	-0.154783	0.00275997
CK-3-1	Carduus nutans				845	734	204	0	0	0	0		0	0
CK-3-1	Oxytropis kansuensis	18	16	6	845	734	204	0.0213018	0.0217984	0.0294118	0.0241706	-3.72262	-0.089978	0.00058422
CK-3-1	Tibetia himalaica				845	734	204	0	0	0	0		0	0
CK-3-1	Festuca elata	37	25	6	845	734	204	0.043787	0.0340599	0.0294118	0.0357529	-3.33112	-0.119097	0.00127827
CK-3-1	Medicago ruthenica	25	19	5	845	734	204	0.0295858	0.0258856	0.0245098	0.0266604	-3.62458	-0.0966326	0.000710776
CK-3-1	Scutellaria baicalensis				845	734	204	0	0	0	0		0	0
CK-3-1	Neotrinia splendens				845	734	204	0	0	0	0		0	0
CK-3-1	Ligularia sagitta	24	30	5	845	734	204	0.0284024	0.0408719	0.0245098	0.0312614	-3.46537	-0.108332	0.000977273
CK-3-1	Nepeta cataria	20	17	3	845	734	204	0.0236686	0.0231608	0.0147059	0.0205118	-3.88676	-0.0797242	0.000420732
CK-3-1	Dysphania schraderiana	8	9	3	845	734	204	0.00946746	0.0122616	0.0147059	0.012145	-4.41084	-0.0535695	0.0001475
CK-3-1	Potentilla sericea	31	27	7	845	734	204	0.0366864	0.0367847	0.0343137	0.0359283	-3.32623	-0.119506	0.00129084
CK-3-1	Ixeris polycephala	10	8	4	845	734	204	0.0118343	0.0108992	0.0196078	0.0141138	-4.2606	-0.0601332	0.000199199
CK-3-1	Stellera chamaejasme				845	734	204	0	0	0	0		0	0
CK-3-1	Geranium wilfordii	36	21	7	845	734	204	0.0426036	0.0286104	0.0343137	0.0351759	-3.34739	-0.117748	0.00123734
CK-3-1	Gentiana scabra				845	734	204	0	0	0	0		0	0
CK-3-1	Gymnaconitum gymnandrum	14	9	2	845	734	204	0.016568	0.0122616	0.00980392	0.0128778	-4.35225	-0.0560476	0.000165839
CK-3-1	Gentiana straminea	10	16	5	845	734	204	0.0118343	0.0217984	0.0245098	0.0193808	-3.94347	-0.0764277	0.000375617
CK-3-1	Iris lactea	12	8	6	845	734	204	0.0142012	0.0108992	0.0294118	0.0181707	-4.00794	-0.0728272	0.000330175
CK-3-1	Pedicularis sylvatica	10	8	4	845	734	204	0.0118343	0.0108992	0.0196078	0.0141138	-4.2606	-0.0601332	0.000199199
CK-3-1	Saussurea pulchra	19	21	8	845	734	204	0.0224852	0.0286104	0.0392157	0.0301037	-3.50311	-0.105457	0.000906236
CK-3-1	Allium mongolicum	11	14	5	845	734	204	0.0130178	0.0190736	0.0245098	0.018867	-3.97034	-0.0749085	0.000355965
CK-3-1	Elsholtzia densa	9	12	2	845	734	204	0.0106509	0.0163488	0.00980392	0.0122679	-4.40077	-0.0539881	0.0001505
CK-3-1	Taraxacum mongolicum	15	21	5	845	734	204	0.0177515	0.0286104	0.0245098	0.0236239	-3.7455	-0.0884832	0.000558088
CK-3-1	Lancea tibetica	8	5	3	845	734	204	0.00946746	0.00681199	0.0147059	0.0103284	-4.57285	-0.0472305	0.000106677
CK-3-1	Anaphalis lactea	10	8	4	845	734	204	0.0118343	0.0108992	0.0196078	0.0141138	-4.2606	-0.0601332	0.000199199
CK-3-1	Euphorbia esula	8	13	5	845	734	204	0.00946746	0.0177112	0.0245098	0.0172295	-4.06113	-0.0699712	0.000296855
CK-3-1	Carex myosuroides	85	92	10	845	734	204	0.100592	0.125341	0.0490196	0.0916506	-2.38977	-0.219024	0.00839984
CK-3-1	Daphne tangutica				845	734	204	0	0	0	0		0	0
CK-3-1	Clematis florida	11	8	4	845	734	204	0.0130178	0.0108992	0.0196078	0.0145083	-4.23304	-0.061414	0.00021049
CK-3-1	Knorringia sibirica	28	31	8	845	734	204	0.0331361	0.0422343	0.0392157	0.0381954	-3.26504	-0.124709	0.00145889
CK-3-1	Ajania tenuifolia	18	15	5	845	734	204	0.0213018	0.020436	0.0245098	0.0220825	-3.81297	-0.0841999	0.000487637
CK-3-1	Thermopsis lupinoides	8	10	2	845	734	204	0.00946746	0.013624	0.00980392	0.0109651	-4.51304	-0.049486	0.000120234
CK-3-1	Artemisia capillaris	27	21	8	845	734	204	0.0319527	0.0286104	0.0392157	0.0332596	-3.40341	-0.113196	0.0011062
CK-3-1	Kali collinum				845	734	204	0	0	0	0		0	0
CK-3-1	Aster tataricus	10	8	2	845	734	204	0.0118343	0.0108992	0.00980392	0.0108458	-4.52398	-0.0490662	0.000117632
CK-3-1	Bare area		7
CK-3-2	Aster altaicus	12	6	3	680	613	174	0.0176471	0.00978793	0.0172414	0.0148921	-4.20692	-0.06265	0.000221775	3.80666	45	3.55333	0.933451	0.0357617
CK-3-2	Leontopodium nanum	9	4	4	680	613	174	0.0132353	0.00652529	0.0229885	0.0142497	-4.25102	-0.0605757	0.000203054
CK-3-2	Artemisia argyi	10	6	2	680	613	174	0.0147059	0.00978793	0.0114943	0.011996	-4.42318	-0.0530606	0.000143905
CK-3-2	Artemisia stechmanniana	9	7	2	680	613	174	0.0132353	0.0114192	0.0114943	0.0120496	-4.41872	-0.0532439	0.000145193
CK-3-2	Gentianopsis barbata	10	7	2	680	613	174	0.0147059	0.0114192	0.0114943	0.0125398	-4.37885	-0.0549099	0.000157246
CK-3-2	Agropyron cristatum	55	47	10	680	613	174	0.0808824	0.0766721	0.0574713	0.0716752	-2.63561	-0.188908	0.00513734
CK-3-2	Poa pratensis	33	22	10	680	613	174	0.0485294	0.0358891	0.0574713	0.0472966	-3.05132	-0.144317	0.00223697
CK-3-2	Potentilla supina	15	18	4	680	613	174	0.0220588	0.0293638	0.0229885	0.0248037	-3.69676	-0.0916934	0.000615224
CK-3-2	Plantago asiatica	2	2	2	680	613	174	0.00294118	0.00326264	0.0114943	0.00589936	-5.13291	-0.0302809	3.48024e-05
CK-3-2	Artemisia hedinii	5	4	2	680	613	174	0.00735294	0.00652529	0.0114943	0.00845749	-4.7727	-0.0403651	7.15292e-05
CK-3-2	Elymus nutans	37	30	7	680	613	174	0.0544118	0.0489396	0.0402299	0.0478604	-3.03947	-0.14547	0.00229062
CK-3-2	Cirsium arvense	2	2	1	680	613	174	0.00294118	0.00326264	0.00574713	0.00398365	-5.52556	-0.0220119	1.58695e-05
CK-3-2	Gentiana dahurica	6	5	2	680	613	174	0.00882353	0.00815661	0.0114943	0.00949146	-4.65736	-0.0442052	9.00879e-05
CK-3-2	Calystegia hederacea				680	613	174	0	0	0	0		0	0
CK-3-2	Cirsium spicatum	3	4	1	680	613	174	0.00441176	0.00652529	0.00574713	0.00556139	-5.19191	-0.0288742	3.09291e-05
CK-3-2	Sanguisorba officinalis	4	5	2	680	613	174	0.00588235	0.00815661	0.0114943	0.00851107	-4.76639	-0.0405671	7.24383e-05
CK-3-2	Androsace umbellata				680	613	174	0	0	0	0		0	0
CK-3-2	Cicuta virosa				680	613	174	0	0	0	0		0	0
CK-3-2	Stipa breviflora	41	31	7	680	613	174	0.0602941	0.050571	0.0402299	0.050365	-2.98846	-0.150514	0.00253663
CK-3-2	Carduus nutans	6	8	2	680	613	174	0.00882353	0.0130506	0.0114943	0.0111228	-4.49876	-0.0500387	0.000123716
CK-3-2	Oxytropis kansuensis	14	13	5	680	613	174	0.0205882	0.0212072	0.0287356	0.0235103	-3.75031	-0.0881712	0.000552736
CK-3-2	Tibetia himalaica				680	613	174	0	0	0	0		0	0
CK-3-2	Festuca elata	30	20	5	680	613	174	0.0441176	0.0326264	0.0287356	0.0351599	-3.34785	-0.11771	0.00123622
CK-3-2	Medicago ruthenica	20	15	4	680	613	174	0.0294118	0.0244698	0.0229885	0.0256234	-3.66425	-0.0938904	0.000656557
CK-3-2	Scutellaria baicalensis				680	613	174	0	0	0	0		0	0
CK-3-2	Neotrinia splendens				680	613	174	0	0	0	0		0	0
CK-3-2	Ligularia sagitta	19	24	4	680	613	174	0.0279412	0.0391517	0.0229885	0.0300271	-3.50565	-0.105265	0.000901629
CK-3-2	Nepeta cataria	16	14	2	680	613	174	0.0235294	0.0228385	0.0114943	0.0192874	-3.9483	-0.0761525	0.000372003
CK-3-2	Dysphania schraderiana	6	7	2	680	613	174	0.00882353	0.0114192	0.0114943	0.010579	-4.54888	-0.0481227	0.000111915
CK-3-2	Potentilla sericea	25	22	6	680	613	174	0.0367647	0.0358891	0.0344828	0.0357122	-3.33226	-0.119002	0.00127536
CK-3-2	Ixeris polycephala	8	6	3	680	613	174	0.0117647	0.00978793	0.0172414	0.0129313	-4.3481	-0.0562268	0.000167219
CK-3-2	Stellera chamaejasme				680	613	174	0	0	0	0		0	0
CK-3-2	Geranium wilfordii	29	17	6	680	613	174	0.0426471	0.0277325	0.0344828	0.0349541	-3.35372	-0.117226	0.00122179
CK-3-2	Gentiana scabra	5	6	2	680	613	174	0.00735294	0.00978793	0.0114943	0.00954504	-4.65173	-0.044401	9.11078e-05
CK-3-2	Gymnaconitum gymnandrum	11	7	2	680	613	174	0.0161765	0.0114192	0.0114943	0.01303	-4.3405	-0.0565567	0.000169781
CK-3-2	Gentiana straminea	8	13	4	680	613	174	0.0117647	0.0212072	0.0229885	0.0186535	-3.98172	-0.0742729	0.000347952
CK-3-2	Iris lactea	10	6	5	680	613	174	0.0147059	0.00978793	0.0287356	0.0177431	-4.03176	-0.071536	0.000314819
CK-3-2	Pedicularis sylvatica	8	6	3	680	613	174	0.0117647	0.00978793	0.0172414	0.0129313	-4.3481	-0.0562268	0.000167219
CK-3-2	Saussurea pulchra	15	17	6	680	613	174	0.0220588	0.0277325	0.0344828	0.0280913	-3.57229	-0.100351	0.000789124
CK-3-2	Allium mongolicum	9	11	4	680	613	174	0.0132353	0.0179445	0.0229885	0.0180561	-4.01427	-0.0724821	0.000326023
CK-3-2	Elsholtzia densa	7	10	2	680	613	174	0.0102941	0.0163132	0.0114943	0.0127005	-4.36611	-0.0554519	0.000161303
CK-3-2	Taraxacum mongolicum	12	17	4	680	613	174	0.0176471	0.0277325	0.0229885	0.0227893	-3.78146	-0.086177	0.000519354
CK-3-2	Lancea tibetica	6	4	2	680	613	174	0.00882353	0.00652529	0.0114943	0.00894769	-4.71636	-0.0422005	8.00611e-05
CK-3-2	Anaphalis lactea	8	6	3	680	613	174	0.0117647	0.00978793	0.0172414	0.0129313	-4.3481	-0.0562268	0.000167219
CK-3-2	Euphorbia esula	6	10	4	680	613	174	0.00882353	0.0163132	0.0229885	0.0160417	-4.13256	-0.0662935	0.000257338
CK-3-2	Carex myosuroides	68	74	10	680	613	174	0.1	0.120718	0.0574713	0.0927297	-2.37807	-0.220517	0.00859879
CK-3-2	Daphne tangutica				680	613	174	0	0	0	0		0	0
CK-3-2	Clematis florida	9	6	3	680	613	174	0.0132353	0.00978793	0.0172414	0.0134215	-4.31089	-0.0578588	0.000180138
CK-3-2	Knorringia sibirica	22	25	6	680	613	174	0.0323529	0.040783	0.0344828	0.0358729	-3.32777	-0.119377	0.00128687
CK-3-2	Ajania tenuifolia	14	12	4	680	613	174	0.0205882	0.0195759	0.0229885	0.0210509	-3.86081	-0.0812735	0.000443139
CK-3-2	Thermopsis lupinoides	6	8	2	680	613	174	0.00882353	0.0130506	0.0114943	0.0111228	-4.49876	-0.0500387	0.000123716
CK-3-2	Artemisia capillaris	22	17	6	680	613	174	0.0323529	0.0277325	0.0344828	0.0315227	-3.45705	-0.108976	0.000993682
CK-3-2	Kali collinum				680	613	174	0	0	0	0		0	0
CK-3-2	Aster tataricus	8	6	2	680	613	174	0.0117647	0.00978793	0.0114943	0.0110156	-4.50844	-0.0496633	0.000121344
CK-3-2	Bare area		6
CK-3-3	Aster altaicus	23	11	6	1191	1069	280	0.0193115	0.01029	0.0214286	0.01701	-4.07395	-0.069298	0.000289341	3.78419	44	3.60983	0.953923	0.0310789
CK-3-3	Leontopodium nanum	17	8	8	1191	1069	280	0.0142737	0.00748363	0.0285714	0.0167763	-4.08779	-0.0685778	0.000281443
CK-3-3	Artemisia argyi	18	11	5	1191	1069	280	0.0151134	0.01029	0.0178571	0.0144202	-4.23913	-0.0611289	0.000207941
CK-3-3	Artemisia stechmanniana	17	14	5	1191	1069	280	0.0142737	0.0130964	0.0178571	0.0150757	-4.19467	-0.0632377	0.000227278
CK-3-3	Gentianopsis barbata	20	14	3	1191	1069	280	0.0167926	0.0130964	0.0107143	0.0135344	-4.30252	-0.0582321	0.00018318
CK-3-3	Agropyron cristatum	66	71	10	1191	1069	280	0.0554156	0.0664172	0.0357143	0.0525157	-2.94664	-0.154745	0.0027579
CK-3-3	Poa pratensis	62	42	10	1191	1069	280	0.0520571	0.0392891	0.0357143	0.0423535	-3.1617	-0.133909	0.00179382
CK-3-3	Potentilla supina	29	33	8	1191	1069	280	0.0243493	0.03087	0.0285714	0.0279302	-3.57805	-0.0999356	0.000780098
CK-3-3	Plantago asiatica	3	3	3	1191	1069	280	0.00251889	0.00280636	0.0107143	0.00534651	-5.23131	-0.0279693	2.85852e-05
CK-3-3	Artemisia hedinii	9	8	3	1191	1069	280	0.00755668	0.00748363	0.0107143	0.00858486	-4.75775	-0.0408447	7.36999e-05
CK-3-3	Elymus nutans	69	57	10	1191	1069	280	0.0579345	0.0533209	0.0357143	0.0489899	-3.01614	-0.14776	0.00240001
CK-3-3	Cirsium arvense	5	3	2	1191	1069	280	0.00419815	0.00280636	0.00714286	0.00471579	-5.35684	-0.0252617	2.22387e-05
CK-3-3	Gentiana dahurica	12	9	3	1191	1069	280	0.0100756	0.00841908	0.0107143	0.00973631	-4.63189	-0.0450976	9.47958e-05
CK-3-3	Calystegia hederacea				1191	1069	280	0	0	0	0		0	0
CK-3-3	Cirsium spicatum	6	8	2	1191	1069	280	0.00503778	0.00748363	0.00714286	0.00655476	-5.02756	-0.0329545	4.29648e-05
CK-3-3	Sanguisorba officinalis	8	9	3	1191	1069	280	0.00671704	0.00841908	0.0107143	0.0086168	-4.75404	-0.0409646	7.42493e-05
CK-3-3	Androsace umbellata				1191	1069	280	0	0	0	0		0	0
CK-3-3	Cicuta virosa				1191	1069	280	0	0	0	0		0	0
CK-3-3	Stipa breviflora	65	59	10	1191	1069	280	0.054576	0.0551918	0.0357143	0.048494	-3.02631	-0.146758	0.00235167
CK-3-3	Carduus nutans				1191	1069	280	0	0	0	0		0	0
CK-3-3	Oxytropis kansuensis	27	24	9	1191	1069	280	0.02267	0.0224509	0.0321429	0.0257546	-3.65914	-0.0942397	0.000663299
CK-3-3	Tibetia himalaica				1191	1069	280	0	0	0	0		0	0
CK-3-3	Festuca elata	44	38	9	1191	1069	280	0.0369437	0.0355472	0.0321429	0.0348779	-3.3559	-0.117047	0.00121647
CK-3-3	Medicago ruthenica	38	29	8	1191	1069	280	0.031906	0.0271282	0.0285714	0.0292018	-3.53352	-0.103185	0.000852748
CK-3-3	Scutellaria baicalensis				1191	1069	280	0	0	0	0		0	0
CK-3-3	Neotrinia splendens				1191	1069	280	0	0	0	0		0	0
CK-3-3	Ligularia sagitta	36	45	8	1191	1069	280	0.0302267	0.0420954	0.0285714	0.0336312	-3.3923	-0.114087	0.00113106
CK-3-3	Nepeta cataria	30	26	5	1191	1069	280	0.0251889	0.0243218	0.0178571	0.022456	-3.7962	-0.0852473	0.00050427
CK-3-3	Dysphania schraderiana	12	14	5	1191	1069	280	0.0100756	0.0130964	0.0178571	0.0136764	-4.29209	-0.0587001	0.000187043
CK-3-3	Potentilla sericea	47	41	7	1191	1069	280	0.0394626	0.0383536	0.025	0.0342721	-3.37342	-0.115614	0.00117458
CK-3-3	Ixeris polycephala	15	12	6	1191	1069	280	0.0125945	0.0112254	0.0214286	0.0150828	-4.1942	-0.0632604	0.000227492
CK-3-3	Stellera chamaejasme				1191	1069	280	0	0	0	0		0	0
CK-3-3	Geranium wilfordii	54	32	7	1191	1069	280	0.0453401	0.0299345	0.025	0.0334249	-3.39846	-0.113593	0.00111722
CK-3-3	Gentiana scabra	9	12	3	1191	1069	280	0.00755668	0.0112254	0.0107143	0.00983214	-4.6221	-0.0454451	9.66709e-05
CK-3-3	Gymnaconitum gymnandrum	21	14	3	1191	1069	280	0.0176322	0.0130964	0.0107143	0.0138143	-4.28205	-0.0591535	0.000190835
CK-3-3	Gentiana straminea	15	24	8	1191	1069	280	0.0125945	0.0224509	0.0285714	0.0212056	-3.85349	-0.0817155	0.000449677
CK-3-3	Iris lactea	18	12	9	1191	1069	280	0.0151134	0.0112254	0.0321429	0.0194939	-3.93765	-0.0767602	0.000380012
CK-3-3	Pedicularis sylvatica	15	12	6	1191	1069	280	0.0125945	0.0112254	0.0214286	0.0150828	-4.1942	-0.0632604	0.000227492
CK-3-3	Saussurea pulchra	29	32	8	1191	1069	280	0.0243493	0.0299345	0.0285714	0.0276184	-3.58927	-0.09913	0.000762777
CK-3-3	Allium mongolicum	17	21	8	1191	1069	280	0.0142737	0.0196445	0.0285714	0.0208299	-3.87137	-0.0806401	0.000433884
CK-3-3	Elsholtzia densa	14	18	3	1191	1069	280	0.0117548	0.0168382	0.0107143	0.0131024	-4.33496	-0.0567985	0.000171674
CK-3-3	Taraxacum mongolicum	23	32	8	1191	1069	280	0.0193115	0.0299345	0.0285714	0.0259391	-3.652	-0.0947298	0.000672839
CK-3-3	Lancea tibetica	12	8	5	1191	1069	280	0.0100756	0.00748363	0.0178571	0.0118054	-4.43919	-0.0524067	0.000139369
CK-3-3	Anaphalis lactea	15	12	6	1191	1069	280	0.0125945	0.0112254	0.0214286	0.0150828	-4.1942	-0.0632604	0.000227492
CK-3-3	Euphorbia esula	12	20	8	1191	1069	280	0.0100756	0.0187091	0.0285714	0.0191187	-3.95709	-0.0756544	0.000365524
CK-3-3	Carex myosuroides	105	85	10	1191	1069	280	0.0881612	0.0795136	0.0357143	0.0677964	-2.69125	-0.182457	0.00459635
CK-3-3	Daphne tangutica				1191	1069	280	0	0	0	0		0	0
CK-3-3	Clematis florida	17	12	6	1191	1069	280	0.0142737	0.0112254	0.0214286	0.0156426	-4.15776	-0.0650381	0.00024469
CK-3-3	Knorringia sibirica	42	47	10	1191	1069	280	0.0352645	0.0439663	0.0357143	0.038315	-3.26191	-0.12498	0.00146804
CK-3-3	Ajania tenuifolia	27	23	8	1191	1069	280	0.02267	0.0215154	0.0285714	0.0242523	-3.71924	-0.0902002	0.000588174
CK-3-3	Thermopsis lupinoides	12	15	3	1191	1069	280	0.0100756	0.0140318	0.0107143	0.0116072	-4.45613	-0.0517233	0.000134728
CK-3-3	Artemisia capillaris	41	32	10	1191	1069	280	0.0344249	0.0299345	0.0357143	0.0333579	-3.40046	-0.113432	0.00111275
CK-3-3	Kali collinum				1191	1069	280	0	0	0	0		0	0
CK-3-3	Aster tataricus	15	12	3	1191	1069	280	0.0125945	0.0112254	0.0107143	0.0115114	-4.46442	-0.0513917	0.000132512
CK-3-3	Bare area		5
10-1-1	Aster altaicus	3	4	2	762	741	144	0.00393701	0.00539811	0.0138889	0.00774134	-4.86118	-0.037632	5.99283e-05	3.73767	42	3.36852	0.901234	0.0436928	39	3.39597	0.92775	0.0407067	38	3.39369	0.933354	0.0405347
10-1-1	Leontopodium nanum	6	5	4	762	741	144	0.00787402	0.00674764	0.0277778	0.0141331	-4.25923	-0.0601963	0.000199746
10-1-1	Artemisia argyi	6	5	1	762	741	144	0.00787402	0.00674764	0.00694444	0.0071887	-4.93524	-0.035478	5.16774e-05
10-1-1	Artemisia stechmanniana	6	5	3	762	741	144	0.00787402	0.00674764	0.0208333	0.0118183	-4.4381	-0.052451	0.000139673
10-1-1	Gentianopsis barbata	4	4	1	762	741	144	0.00524934	0.00539811	0.00694444	0.00586397	-5.13893	-0.0301345	3.43861e-05
10-1-1	Agropyron cristatum	68	72	10	762	741	144	0.0892388	0.097166	0.0694444	0.0852831	-2.46178	-0.209948	0.00727321
10-1-1	Poa pratensis	52	41	10	762	741	144	0.0682415	0.0553306	0.0694444	0.0643388	-2.74359	-0.17652	0.00413949
10-1-1	Potentilla supina	52	36	5	762	741	144	0.0682415	0.048583	0.0347222	0.0505156	-2.98547	-0.150813	0.00255182
10-1-1	Plantago asiatica	2	4	3	762	741	144	0.00262467	0.00539811	0.0208333	0.00961871	-4.64405	-0.0446697	9.25195e-05
10-1-1	Artemisia hedinii	4	4	1	762	741	144	0.00524934	0.00539811	0.00694444	0.00586397	-5.13893	-0.0301345	3.43861e-05
10-1-1	Elymus nutans	41	17	5	762	741	144	0.0538058	0.022942	0.0347222	0.0371567	-3.29261	-0.122342	0.00138062
10-1-1	Cirsium arvense	3	5	2	762	741	144	0.00393701	0.00674764	0.0138889	0.00819118	-4.8047	-0.0393561	6.70954e-05
10-1-1	Gentiana dahurica	4	4	2	762	741	144	0.00524934	0.00539811	0.0138889	0.00817878	-4.80621	-0.039309	6.68925e-05
10-1-1	Calystegia hederacea	4	4	2	762	741	144	0.00524934	0.00539811	0.0138889	0.00817878	-4.80621	-0.039309	6.68925e-05
10-1-1	Cirsium spicatum	2	1	1	762	741	144	0.00262467	0.00134953	0.00694444	0.00363955	-5.6159	-0.0204393	1.32463e-05
10-1-1	Sanguisorba officinalis	6	4	1	762	741	144	0.00787402	0.00539811	0.00694444	0.00673886	-4.99986	-0.0336934	4.54122e-05
10-1-1	Androsace umbellata	3	6	2	762	741	144	0.00393701	0.00809717	0.0138889	0.00864102	-4.75123	-0.0410555	7.46672e-05
10-1-1	Cicuta virosa	1	1	1	762	741	144	0.00131234	0.00134953	0.00694444	0.0032021	-5.74395	-0.0183927	1.02535e-05
10-1-1	Stipa breviflora	38	24	5	762	741	144	0.0498688	0.0323887	0.0347222	0.0389932	-3.24437	-0.126508	0.00152047
10-1-1	Carduus nutans	2	3	1	762	741	144	0.00262467	0.00404858	0.00694444	0.00453923	-5.395	-0.0244891	2.06046e-05
10-1-1	Oxytropis kansuensis	18	17	6	762	741	144	0.023622	0.022942	0.0416667	0.0294102	-3.52641	-0.103713	0.000864962
10-1-1	Tibetia himalaica	4	4	1	762	741	144	0.00524934	0.00539811	0.00694444	0.00586397	-5.13893	-0.0301345	3.43861e-05
10-1-1	Festuca elata	72	51	2	762	741	144	0.0944882	0.0688259	0.0138889	0.0590677	-2.82907	-0.167107	0.00348899
10-1-1	Medicago ruthenica	28	21	4	762	741	144	0.0367454	0.0283401	0.0277778	0.0309544	-3.47524	-0.107574	0.000958176
10-1-1	Scutellaria baicalensis	12	24	2	762	741	144	0.015748	0.0323887	0.0138889	0.0206752	-3.87882	-0.0801954	0.000427464
10-1-1	Neotrinia splendens	8	10	1	762	741	144	0.0104987	0.0134953	0.00694444	0.0103128	-4.57437	-0.0471746	0.000106354
10-1-1	Ligularia sagitta	8	12	1	762	741	144	0.0104987	0.0161943	0.00694444	0.0112125	-4.49073	-0.0503522	0.00012572
10-1-1	Nepeta cataria	12	12	3	762	741	144	0.015748	0.0161943	0.0208333	0.0175919	-4.04032	-0.0710768	0.000309475
10-1-1	Dysphania schraderiana	8	11	3	762	741	144	0.0104987	0.0148448	0.0208333	0.0153923	-4.17389	-0.0642457	0.000236922
10-1-1	Potentilla sericea	18	22	6	762	741	144	0.023622	0.0296896	0.0416667	0.0316594	-3.45272	-0.109311	0.00100232
10-1-1	Ixeris polycephala	21	19	5	762	741	144	0.0275591	0.025641	0.0347222	0.0293074	-3.52991	-0.103453	0.000858926
10-1-1	Stellera chamaejasme				762	741	144	0	0	0	0		0	0
10-1-1	Geranium wilfordii	41	36	8	762	741	144	0.0538058	0.048583	0.0555556	0.0526481	-2.94412	-0.155003	0.00277182
10-1-1	Gentiana scabra				762	741	144	0	0	0	0		0	0
10-1-1	Gymnaconitum gymnandrum				762	741	144	0	0	0	0		0	0
10-1-1	Gentiana straminea				762	741	144	0	0	0	0		0	0
10-1-1	Iris lactea				762	741	144	0	0	0	0		0	0
10-1-1	Pedicularis sylvatica	5	7	2	762	741	144	0.00656168	0.00944669	0.0138889	0.00996575	-4.6086	-0.0459282	9.93163e-05
10-1-1	Saussurea pulchra	16	27	4	762	741	144	0.0209974	0.0364372	0.0277778	0.0284041	-3.56122	-0.101153	0.000806795
10-1-1	Allium mongolicum	20	25	3	762	741	144	0.0262467	0.0337382	0.0208333	0.0269394	-3.61416	-0.0973635	0.000725732
10-1-1	Elsholtzia densa	27	19	3	762	741	144	0.0354331	0.025641	0.0208333	0.0273025	-3.60078	-0.0983102	0.000745425
10-1-1	Taraxacum mongolicum				762	741	144	0	0	0	0		0	0
10-1-1	Lancea tibetica				762	741	144	0	0	0	0		0	0
10-1-1	Anaphalis lactea				762	741	144	0	0	0	0		0	0
10-1-1	Euphorbia esula				762	741	144	0	0	0	0		0	0
10-1-1	Carex myosuroides	88	83	10	762	741	144	0.115486	0.112011	0.0694444	0.0989803	-2.31283	-0.228925	0.00979709
10-1-1	Daphne tangutica				762	741	144	0	0	0	0		0	0
10-1-1	Clematis florida				762	741	144	0	0	0	0		0	0
10-1-1	Knorringia sibirica	20	32	7	762	741	144	0.0262467	0.0431849	0.0486111	0.0393476	-3.23532	-0.127302	0.00154823
10-1-1	Ajania tenuifolia	8	17	3	762	741	144	0.0104987	0.022942	0.0208333	0.0180913	-4.01232	-0.0725883	0.000327296
10-1-1	Thermopsis lupinoides	5	8	1	762	741	144	0.00656168	0.0107962	0.00694444	0.00810078	-4.81579	-0.0390117	6.56227e-05
10-1-1	Artemisia capillaris	8	10	4	762	741	144	0.0104987	0.0134953	0.0277778	0.0172572	-4.05952	-0.0700562	0.000297813
10-1-1	Kali collinum				762	741	144	0	0	0	0		0	0
10-1-1	Aster tataricus	8	12	3	762	741	144	0.0104987	0.0161943	0.0208333	0.0158421	-4.14508	-0.0656669	0.000250973
10-1-1	Bare area		13
10-1-2	Aster altaicus	8	7	2	768	753	160	0.0104167	0.00929615	0.0125	0.0107376	-4.534	-0.0486843	0.000115296	3.66356	39	3.44041	0.939089	0.0391998
10-1-2	Leontopodium nanum	11	8	3	768	753	160	0.0143229	0.0106242	0.01875	0.0145657	-4.22909	-0.0615996	0.000212159
10-1-2	Artemisia argyi				768	753	160	0	0	0	0		0	0
10-1-2	Artemisia stechmanniana	11	8	3	768	753	160	0.0143229	0.0106242	0.01875	0.0145657	-4.22909	-0.0615996	0.000212159
10-1-2	Gentianopsis barbata	9	7	1	768	753	160	0.0117188	0.00929615	0.00625	0.0090883	-4.70077	-0.042722	8.25972e-05
10-1-2	Agropyron cristatum	60	62	10	768	753	160	0.078125	0.0823373	0.0625	0.0743208	-2.59936	-0.193187	0.00552358
10-1-2	Poa pratensis	48	37	10	768	753	160	0.0625	0.0491368	0.0625	0.0580456	-2.84653	-0.165228	0.00336929
10-1-2	Potentilla supina	50	33	5	768	753	160	0.0651042	0.0438247	0.03125	0.0467263	-3.06345	-0.143144	0.00218335
10-1-2	Plantago asiatica	8	7	3	768	753	160	0.0104167	0.00929615	0.01875	0.0128209	-4.35668	-0.0558567	0.000164376
10-1-2	Artemisia hedinii	9	7	2	768	753	160	0.0117188	0.00929615	0.0125	0.0111716	-4.49438	-0.0502095	0.000124805
10-1-2	Elymus nutans	39	18	5	768	753	160	0.0507812	0.0239044	0.03125	0.0353119	-3.34354	-0.118067	0.00124693
10-1-2	Cirsium arvense	8	8	3	768	753	160	0.0104167	0.0106242	0.01875	0.0132636	-4.32273	-0.057335	0.000175923
10-1-2	Gentiana dahurica	9	7	3	768	753	160	0.0117188	0.00929615	0.01875	0.013255	-4.32338	-0.0573063	0.000175694
10-1-2	Calystegia hederacea	9	7	3	768	753	160	0.0117188	0.00929615	0.01875	0.013255	-4.32338	-0.0573063	0.000175694
10-1-2	Cirsium spicatum	8	5	2	768	753	160	0.0104167	0.00664011	0.0125	0.00985226	-4.62005	-0.045518	9.7067e-05
10-1-2	Sanguisorba officinalis	11	7	2	768	753	160	0.0143229	0.00929615	0.0125	0.0120397	-4.41955	-0.05321	0.000144954
10-1-2	Androsace umbellata	8	9	3	768	753	160	0.0104167	0.0119522	0.01875	0.0137063	-4.2899	-0.0587986	0.000187862
10-1-2	Cicuta virosa				768	753	160	0	0	0	0		0	0
10-1-2	Stipa breviflora	37	23	6	768	753	160	0.0481771	0.0305445	0.0375	0.0387405	-3.25087	-0.12594	0.00150083
10-1-2	Carduus nutans				768	753	160	0	0	0	0		0	0
10-1-2	Oxytropis kansuensis	21	18	6	768	753	160	0.0273438	0.0239044	0.0375	0.0295827	-3.52057	-0.104148	0.000875137
10-1-2	Tibetia himalaica	8	7	2	768	753	160	0.0104167	0.00929615	0.0125	0.0107376	-4.534	-0.0486843	0.000115296
10-1-2	Festuca elata	64	45	6	768	753	160	0.0833333	0.059761	0.0375	0.0601981	-2.81011	-0.169164	0.00362381
10-1-2	Medicago ruthenica	8	21	4	768	753	160	0.0104167	0.0278884	0.025	0.0211017	-3.8584	-0.0814188	0.000445282
10-1-2	Scutellaria baicalensis	16	23	5	768	753	160	0.0208333	0.0305445	0.03125	0.0275426	-3.59202	-0.0989336	0.000758595
10-1-2	Neotrinia splendens	12	12	2	768	753	160	0.015625	0.0159363	0.0125	0.0146871	-4.22079	-0.0619911	0.00021571
10-1-2	Ligularia sagitta	13	14	4	768	753	160	0.0169271	0.0185923	0.025	0.0201731	-3.9034	-0.0787439	0.000406955
10-1-2	Nepeta cataria	16	14	3	768	753	160	0.0208333	0.0185923	0.01875	0.0193919	-3.9429	-0.0764603	0.000376045
10-1-2	Dysphania schraderiana	12	13	3	768	753	160	0.015625	0.0172643	0.01875	0.0172131	-4.06209	-0.069921	0.000296291
10-1-2	Potentilla sericea	20	22	5	768	753	160	0.0260417	0.0292165	0.03125	0.028836	-3.54613	-0.102256	0.000831517
10-1-2	Ixeris polycephala		19	6	768	753	160	0	0.0252324	0.0375	0.0209108	-3.86749	-0.0808723	0.000437262
10-1-2	Stellera chamaejasme				768	753	160	0	0	0	0		0	0
10-1-2	Geranium wilfordii	39	33	6	768	753	160	0.0507812	0.0438247	0.0375	0.0440353	-3.12276	-0.137512	0.00193911
10-1-2	Gentiana scabra				768	753	160	0	0	0	0		0	0
10-1-2	Gymnaconitum gymnandrum				768	753	160	0	0	0	0		0	0
10-1-2	Gentiana straminea				768	753	160	0	0	0	0		0	0
10-1-2	Iris lactea				768	753	160	0	0	0	0		0	0
10-1-2	Pedicularis sylvatica	10	10	3	768	753	160	0.0130208	0.0132802	0.01875	0.015017	-4.19857	-0.06305	0.000225511
10-1-2	Saussurea pulchra	19	26	5	768	753	160	0.0247396	0.0345286	0.03125	0.0301727	-3.50082	-0.105629	0.000910393
10-1-2	Allium mongolicum	22	24	2	768	753	160	0.0286458	0.0318725	0.0125	0.0243394	-3.71566	-0.090437	0.000592409
10-1-2	Elsholtzia densa	8	19	4	768	753	160	0.0104167	0.0252324	0.025	0.0202164	-3.90126	-0.0788693	0.000408701
10-1-2	Taraxacum mongolicum				768	753	160	0	0	0	0		0	0
10-1-2	Lancea tibetica				768	753	160	0	0	0	0		0	0
10-1-2	Anaphalis lactea				768	753	160	0	0	0	0		0	0
10-1-2	Euphorbia esula				768	753	160	0	0	0	0		0	0
10-1-2	Carex myosuroides	90	80	10	768	753	160	0.117188	0.106242	0.0625	0.0953097	-2.35062	-0.224037	0.00908395
10-1-2	Daphne tangutica				768	753	160	0	0	0	0		0	0
10-1-2	Clematis florida				768	753	160	0	0	0	0		0	0
10-1-2	Knorringia sibirica		30	7	768	753	160	0	0.0398406	0.04375	0.0278635	-3.58044	-0.0997636	0.000776377
10-1-2	Ajania tenuifolia	12	18	4	768	753	160	0.015625	0.0239044	0.025	0.0215098	-3.83925	-0.0825814	0.000462671
10-1-2	Thermopsis lupinoides	10	10	1	768	753	160	0.0130208	0.0132802	0.00625	0.0108503	-4.52356	-0.0490822	0.00011773
10-1-2	Artemisia capillaris	12	12	3	768	753	160	0.015625	0.0159363	0.01875	0.0167704	-4.08814	-0.0685598	0.000281247
10-1-2	Kali collinum				768	753	160	0	0	0	0		0	0
10-1-2	Aster tataricus	13	14	3	768	753	160	0.0169271	0.0185923	0.01875	0.0180898	-4.01241	-0.0725836	0.000327241
10-1-2	Bare area		9
10-1-3	Aster altaicus	11	10	3	1188	1199	202	0.00925926	0.00834028	0.0148515	0.010817	-4.52664	-0.0489647	0.000117008	3.58352	36	3.37899	0.942926	0.0392276
10-1-3	Leontopodium nanum				1188	1199	202	0	0	0	0		0	0
10-1-3	Artemisia argyi	16	12	2	1188	1199	202	0.013468	0.0100083	0.00990099	0.0111258	-4.49849	-0.0500492	0.000123783
10-1-3	Artemisia stechmanniana	4	12	5	1188	1199	202	0.003367	0.0100083	0.0247525	0.0127093	-4.36542	-0.0554814	0.000161526
10-1-3	Gentianopsis barbata	13	10	2	1188	1199	202	0.0109428	0.00834028	0.00990099	0.00972801	-4.63275	-0.0450674	9.46342e-05
10-1-3	Agropyron cristatum	97	98	10	1188	1199	202	0.0816498	0.0817348	0.049505	0.0709632	-2.64559	-0.18774	0.00503577
10-1-3	Poa pratensis	86	66	10	1188	1199	202	0.0723906	0.0550459	0.049505	0.0589805	-2.83055	-0.166947	0.0034787
10-1-3	Potentilla supina	88	58	10	1188	1199	202	0.0740741	0.0483736	0.049505	0.0573176	-2.85915	-0.163879	0.0032853
10-1-3	Plantago asiatica	9	10	5	1188	1199	202	0.00757576	0.00834028	0.0247525	0.0135562	-4.30091	-0.0583039	0.00018377
10-1-3	Artemisia hedinii	12	10	2	1188	1199	202	0.010101	0.00834028	0.00990099	0.00944743	-4.66201	-0.044044	8.92539e-05
10-1-3	Elymus nutans	70	30	8	1188	1199	202	0.0589226	0.0250209	0.039604	0.0411825	-3.18974	-0.131361	0.00169599
10-1-3	Cirsium arvense	11	12	3	1188	1199	202	0.00925926	0.0100083	0.0148515	0.011373	-4.47651	-0.0509115	0.000129346
10-1-3	Gentiana dahurica	12	10	3	1188	1199	202	0.010101	0.00834028	0.0148515	0.0110976	-4.50103	-0.0499506	0.000123157
10-1-3	Calystegia hederacea	12	10	3	1188	1199	202	0.010101	0.00834028	0.0148515	0.0110976	-4.50103	-0.0499506	0.000123157
10-1-3	Cirsium spicatum				1188	1199	202	0	0	0	0		0	0
10-1-3	Sanguisorba officinalis				1188	1199	202	0	0	0	0		0	0
10-1-3	Androsace umbellata	11	13	3	1188	1199	202	0.00925926	0.0108424	0.0148515	0.011651	-4.45236	-0.0518746	0.000135747
10-1-3	Cicuta virosa				1188	1199	202	0	0	0	0		0	0
10-1-3	Stipa breviflora	63	41	10	1188	1199	202	0.0530303	0.0341952	0.049505	0.0455768	-3.08836	-0.140757	0.00207725
10-1-3	Carduus nutans				1188	1199	202	0	0	0	0		0	0
10-1-3	Oxytropis kansuensis	33	38	9	1188	1199	202	0.0277778	0.0316931	0.0445545	0.0346751	-3.36173	-0.116568	0.00120236
10-1-3	Tibetia himalaica				1188	1199	202	0	0	0	0		0	0
10-1-3	Festuca elata	96	85	3	1188	1199	202	0.0808081	0.0708924	0.0148515	0.0555173	-2.89106	-0.160504	0.00308217
10-1-3	Medicago ruthenica	48	36	6	1188	1199	202	0.040404	0.030025	0.029703	0.0333773	-3.39988	-0.113479	0.00111405
10-1-3	Scutellaria baicalensis	4	40	3	1188	1199	202	0.003367	0.0333611	0.0148515	0.0171932	-4.06324	-0.0698601	0.000295606
10-1-3	Neotrinia splendens	18	19	4	1188	1199	202	0.0151515	0.0158465	0.019802	0.0169333	-4.07847	-0.0690621	0.000286738
10-1-3	Ligularia sagitta	18	24	2	1188	1199	202	0.0151515	0.0200167	0.00990099	0.0150231	-4.19817	-0.0630693	0.000225692
10-1-3	Nepeta cataria		22	5	1188	1199	202	0	0.0183486	0.0247525	0.014367	-4.24282	-0.0609567	0.000206412
10-1-3	Dysphania schraderiana	20	21	5	1188	1199	202	0.016835	0.0175146	0.0247525	0.0197007	-3.9271	-0.0773666	0.000388117
10-1-3	Potentilla sericea	33	37	10	1188	1199	202	0.0277778	0.030859	0.049505	0.0360473	-3.32292	-0.119782	0.0012994
10-1-3	Ixeris polycephala	40	33	9	1188	1199	202	0.03367	0.0275229	0.0445545	0.0352491	-3.34531	-0.117919	0.0012425
10-1-3	Stellera chamaejasme				1188	1199	202	0	0	0	0		0	0
10-1-3	Geranium wilfordii	71	58	10	1188	1199	202	0.0597643	0.0483736	0.049505	0.0525476	-2.94604	-0.154807	0.00276125
10-1-3	Gentiana scabra				1188	1199	202	0	0	0	0		0	0
10-1-3	Gymnaconitum gymnandrum				1188	1199	202	0	0	0	0		0	0
10-1-3	Gentiana straminea				1188	1199	202	0	0	0	0		0	0
10-1-3	Iris lactea				1188	1199	202	0	0	0	0		0	0
10-1-3	Pedicularis sylvatica	4	15	3	1188	1199	202	0.003367	0.0125104	0.0148515	0.010243	-4.58116	-0.0469247	0.000104918
10-1-3	Saussurea pulchra	11	45	6	1188	1199	202	0.00925926	0.0375313	0.029703	0.0254978	-3.66916	-0.0935557	0.00065014
10-1-3	Allium mongolicum	37	42	5	1188	1199	202	0.0311448	0.0350292	0.0247525	0.0303088	-3.49632	-0.105969	0.000918624
10-1-3	Elsholtzia densa	48	33	5	1188	1199	202	0.040404	0.0275229	0.0247525	0.0308932	-3.47722	-0.107422	0.000954387
10-1-3	Taraxacum mongolicum				1188	1199	202	0	0	0	0		0	0
10-1-3	Lancea tibetica				1188	1199	202	0	0	0	0		0	0
10-1-3	Anaphalis lactea				1188	1199	202	0	0	0	0		0	0
10-1-3	Euphorbia esula				1188	1199	202	0	0	0	0		0	0
10-1-3	Carex myosuroides	83	98	10	1188	1199	202	0.0698653	0.0817348	0.049505	0.067035	-2.70254	-0.181165	0.00449369
10-1-3	Daphne tangutica				1188	1199	202	0	0	0	0		0	0
10-1-3	Clematis florida				1188	1199	202	0	0	0	0		0	0
10-1-3	Knorringia sibirica	37	52	10	1188	1199	202	0.0311448	0.0433695	0.049505	0.0413397	-3.18593	-0.131706	0.00170897
10-1-3	Ajania tenuifolia	20	30	5	1188	1199	202	0.016835	0.0250209	0.0247525	0.0222028	-3.80754	-0.0845379	0.000492963
10-1-3	Thermopsis lupinoides	14	16	2	1188	1199	202	0.0117845	0.0133445	0.00990099	0.0116767	-4.45016	-0.051963	0.000136344
10-1-3	Artemisia capillaris	19	19	6	1188	1199	202	0.0159933	0.0158465	0.029703	0.0205143	-3.88664	-0.0797314	0.000420835
10-1-3	Kali collinum				1188	1199	202	0	0	0	0		0	0
10-1-3	Aster tataricus	19	22	5	1188	1199	202	0.0159933	0.0183486	0.0247525	0.0196981	-3.92723	-0.0773591	0.000388016
10-1-3	Bare area		12
10-2-1	Aster altaicus	11	10	5	952	933	189	0.0115546	0.0107181	0.026455	0.0162426	-4.12012	-0.0669214	0.000263822	3.63759	38	3.3796	0.929079	0.0417104	37	3.38057	0.93631	0.0407543
10-2-1	Leontopodium nanum	14	11	5	952	933	189	0.0147059	0.0117899	0.026455	0.0176503	-4.037	-0.0712542	0.000311532
10-2-1	Artemisia argyi	11	9	3	952	933	189	0.0115546	0.0096463	0.015873	0.012358	-4.39345	-0.0542942	0.00015272
10-2-1	Artemisia stechmanniana	4	10	4	952	933	189	0.00420168	0.0107181	0.021164	0.0120279	-4.42052	-0.0531698	0.000144671
10-2-1	Gentianopsis barbata	11	8	2	952	933	189	0.0115546	0.00857449	0.010582	0.010237	-4.58174	-0.0469035	0.000104797
10-2-1	Agropyron cristatum	103	86	10	952	933	189	0.108193	0.0921758	0.0529101	0.0844264	-2.47188	-0.208691	0.00712781
10-2-1	Poa pratensis	83	67	10	952	933	189	0.0871849	0.0718114	0.0529101	0.0706354	-2.65022	-0.1872	0.00498936
10-2-1	Potentilla supina	50	42	8	952	933	189	0.052521	0.0450161	0.042328	0.0466217	-3.06569	-0.142928	0.00217358
10-2-1	Plantago asiatica	9	10	2	952	933	189	0.00945378	0.0107181	0.010582	0.0102513	-4.58035	-0.0469546	0.000105089
10-2-1	Artemisia hedinii	10	7	1	952	933	189	0.0105042	0.00750268	0.00529101	0.00776596	-4.858	-0.0377271	6.03102e-05
10-2-1	Elymus nutans	56	35	9	952	933	189	0.0588235	0.0375134	0.047619	0.0479853	-3.03686	-0.145725	0.00230259
10-2-1	Cirsium arvense	4	11	4	952	933	189	0.00420168	0.0117899	0.021164	0.0123852	-4.39125	-0.0543866	0.000153393
10-2-1	Gentiana dahurica	12	10	4	952	933	189	0.012605	0.0107181	0.021164	0.0148291	-4.21117	-0.0624476	0.000219901
10-2-1	Calystegia hederacea	10	9	2	952	933	189	0.0105042	0.0096463	0.010582	0.0102442	-4.58105	-0.046929	0.000104943
10-2-1	Cirsium spicatum				952	933	189	0	0	0	0		0	0
10-2-1	Sanguisorba officinalis				952	933	189	0	0	0	0		0	0
10-2-1	Androsace umbellata	13	9	3	952	933	189	0.0136555	0.0096463	0.015873	0.0130583	-4.33833	-0.0566511	0.000170518
10-2-1	Cicuta virosa				952	933	189	0	0	0	0		0	0
10-2-1	Stipa breviflora	51	40	10	952	933	189	0.0535714	0.0428725	0.0529101	0.0497846	-3.00005	-0.149356	0.00247851
10-2-1	Carduus nutans				952	933	189	0	0	0	0		0	0
10-2-1	Oxytropis kansuensis	46	36	8	952	933	189	0.0483193	0.0385852	0.042328	0.0430775	-3.14475	-0.135468	0.00185567
10-2-1	Tibetia himalaica	8	7	1	952	933	189	0.00840336	0.00750268	0.00529101	0.00706568	-4.95251	-0.0349928	4.99239e-05
10-2-1	Festuca elata	72	62	8	952	933	189	0.0756303	0.0664523	0.042328	0.0614702	-2.7892	-0.171453	0.00377859
10-2-1	Medicago ruthenica	6	22	5	952	933	189	0.00630252	0.0235798	0.026455	0.0187791	-3.97501	-0.0746472	0.000352656
10-2-1	Scutellaria baicalensis	20	24	3	952	933	189	0.0210084	0.0257235	0.015873	0.0208683	-3.86952	-0.0807504	0.000435486
10-2-1	Neotrinia splendens	17	12	2	952	933	189	0.0178571	0.0128617	0.010582	0.013767	-4.28548	-0.0589981	0.000189529
10-2-1	Ligularia sagitta	16	19	2	952	933	189	0.0168067	0.0203644	0.010582	0.0159177	-4.14032	-0.0659045	0.000253374
10-2-1	Nepeta cataria	22	18	4	952	933	189	0.0231092	0.0192926	0.021164	0.0211886	-3.85429	-0.0816671	0.000448958
10-2-1	Dysphania schraderiana	16	19	4	952	933	189	0.0168067	0.0203644	0.021164	0.0194451	-3.94016	-0.0766167	0.00037811
10-2-1	Potentilla sericea	7	22	7	952	933	189	0.00735294	0.0235798	0.037037	0.0226566	-3.7873	-0.0858075	0.000513322
10-2-1	Ixeris polycephala		24	4	952	933	189	0	0.0257235	0.021164	0.0156292	-4.15862	-0.0649957	0.000244271
10-2-1	Stellera chamaejasme				952	933	189	0	0	0	0		0	0
10-2-1	Geranium wilfordii	58	42	10	952	933	189	0.0609244	0.0450161	0.0529101	0.0529502	-2.9384	-0.155589	0.00280372
10-2-1	Gentiana scabra				952	933	189	0	0	0	0		0	0
10-2-1	Gymnaconitum gymnandrum				952	933	189	0	0	0	0		0	0
10-2-1	Gentiana straminea				952	933	189	0	0	0	0		0	0
10-2-1	Iris lactea				952	933	189	0	0	0	0		0	0
10-2-1	Pedicularis sylvatica	4	9	2	952	933	189	0.00420168	0.0096463	0.010582	0.00814333	-4.81056	-0.039174	6.63138e-05
10-2-1	Saussurea pulchra		29	5	952	933	189	0	0.0310825	0.026455	0.0191792	-3.95393	-0.0758332	0.000367841
10-2-1	Allium mongolicum	20	22	6	952	933	189	0.0210084	0.0235798	0.031746	0.0254448	-3.67125	-0.093414	0.000647436
10-2-1	Elsholtzia densa		18	2	952	933	189	0	0.0192926	0.010582	0.00995821	-4.60936	-0.0459009	9.91658e-05
10-2-1	Taraxacum mongolicum				952	933	189	0	0	0	0		0	0
10-2-1	Lancea tibetica				952	933	189	0	0	0	0		0	0
10-2-1	Anaphalis lactea				952	933	189	0	0	0	0		0	0
10-2-1	Euphorbia esula				952	933	189	0	0	0	0		0	0
10-2-1	Carex myosuroides	87	72	10	952	933	189	0.0913866	0.0771704	0.0529101	0.0738223	-2.60609	-0.192388	0.00544974
10-2-1	Daphne tangutica				952	933	189	0	0	0	0		0	0
10-2-1	Clematis florida				952	933	189	0	0	0	0		0	0
10-2-1	Knorringia sibirica	40	32	8	952	933	189	0.0420168	0.034298	0.042328	0.0395476	-3.23025	-0.127749	0.00156401
10-2-1	Ajania tenuifolia	17	19	3	952	933	189	0.0178571	0.0203644	0.015873	0.0180315	-4.01563	-0.072408	0.000325136
10-2-1	Thermopsis lupinoides	12	10	3	952	933	189	0.012605	0.0107181	0.015873	0.0130654	-4.33779	-0.0566749	0.000170704
10-2-1	Artemisia capillaris	19	19	6	952	933	189	0.019958	0.0203644	0.031746	0.0240228	-3.72875	-0.0895751	0.000577095
10-2-1	Kali collinum				952	933	189	0	0	0	0		0	0
10-2-1	Aster tataricus	13	14	4	952	933	189	0.0136555	0.0150054	0.021164	0.0166083	-4.09785	-0.0680583	0.000275835
10-2-1	Bare area		8
10-2-2	Aster altaicus	11	9	2	935	797	183	0.0117647	0.0112923	0.010929	0.0113287	-4.48042	-0.0507572	0.000128339	3.61092	37	3.37601	0.934945	0.0415254
10-2-2	Leontopodium nanum	12	10	3	935	797	183	0.0128342	0.0125471	0.0163934	0.0139249	-4.27408	-0.0595161	0.000193903
10-2-2	Artemisia argyi	11	8	2	935	797	183	0.0117647	0.0100376	0.010929	0.0109104	-4.51804	-0.0492937	0.000119038
10-2-2	Artemisia stechmanniana	14	9	4	935	797	183	0.0149733	0.0112923	0.0218579	0.0160412	-4.1326	-0.0662917	0.000257319
10-2-2	Gentianopsis barbata	12	7	1	935	797	183	0.0128342	0.00878294	0.00546448	0.00902721	-4.70751	-0.0424957	8.14906e-05
10-2-2	Agropyron cristatum	84	86	10	935	797	183	0.0898396	0.107905	0.0546448	0.0841297	-2.4754	-0.208254	0.0070778
10-2-2	Poa pratensis	87	67	10	935	797	183	0.0930481	0.0840652	0.0546448	0.0772527	-2.56067	-0.197819	0.00596798
10-2-2	Potentilla supina	37	34	9	935	797	183	0.0395722	0.04266	0.0491803	0.0438042	-3.12803	-0.137021	0.0019188
10-2-2	Plantago asiatica	8	9	2	935	797	183	0.00855615	0.0112923	0.010929	0.0102592	-4.57959	-0.0469827	0.00010525
10-2-2	Artemisia hedinii	9	6	1	935	797	183	0.00962567	0.00752823	0.00546448	0.00753946	-4.8876	-0.0368499	5.68435e-05
10-2-2	Elymus nutans	47	23	9	935	797	183	0.0502674	0.0288582	0.0491803	0.0427686	-3.15195	-0.134805	0.00182916
10-2-2	Cirsium arvense	14	10	2	935	797	183	0.0149733	0.0125471	0.010929	0.0128164	-4.35703	-0.0558415	0.000164261
10-2-2	Gentiana dahurica	11	9	2	935	797	183	0.0117647	0.0112923	0.010929	0.0113287	-4.48042	-0.0507572	0.000128339
10-2-2	Calystegia hederacea	9	8	2	935	797	183	0.00962567	0.0100376	0.010929	0.0101974	-4.58562	-0.0467615	0.000103987
10-2-2	Cirsium spicatum				935	797	183	0	0	0	0		0	0
10-2-2	Sanguisorba officinalis				935	797	183	0	0	0	0		0	0
10-2-2	Androsace umbellata	11	8	2	935	797	183	0.0117647	0.0100376	0.010929	0.0109104	-4.51804	-0.0492937	0.000119038
10-2-2	Cicuta virosa				935	797	183	0	0	0	0		0	0
10-2-2	Stipa breviflora	42	33	10	935	797	183	0.0449198	0.0414053	0.0546448	0.04699	-3.05782	-0.143687	0.00220806
10-2-2	Carduus nutans				935	797	183	0	0	0	0		0	0
10-2-2	Oxytropis kansuensis	37	26	5	935	797	183	0.0395722	0.0326223	0.0273224	0.0331723	-3.40604	-0.112986	0.0011004
10-2-2	Tibetia himalaica	8	6	3	935	797	183	0.00855615	0.00752823	0.0163934	0.0108259	-4.52581	-0.0489962	0.000117201
10-2-2	Festuca elata	60	50	5	935	797	183	0.0641711	0.0627353	0.0273224	0.0514096	-2.96793	-0.15258	0.00264295
10-2-2	Medicago ruthenica	41	18	8	935	797	183	0.0438503	0.0225847	0.0437158	0.0367169	-3.30452	-0.121332	0.00134813
10-2-2	Scutellaria baicalensis	19	20	4	935	797	183	0.0203209	0.0250941	0.0218579	0.0224243	-3.79761	-0.0851587	0.000502849
10-2-2	Neotrinia splendens	16	17	6	935	797	183	0.0171123	0.02133	0.0327869	0.0237431	-3.74047	-0.0888101	0.000563733
10-2-2	Ligularia sagitta				935	797	183	0	0	0	0		0	0
10-2-2	Nepeta cataria	18	15	3	935	797	183	0.0192513	0.0188206	0.0163934	0.0181551	-4.0088	-0.0727803	0.000329608
10-2-2	Dysphania schraderiana	4	16	5	935	797	183	0.00427807	0.0200753	0.0273224	0.0172253	-4.06138	-0.0699583	0.000296709
10-2-2	Potentilla sericea	4	18	8	935	797	183	0.00427807	0.0225847	0.0437158	0.0235262	-3.74964	-0.0882148	0.000553482
10-2-2	Ixeris polycephala	20	20	3	935	797	183	0.0213904	0.0250941	0.0163934	0.0209593	-3.86517	-0.0810113	0.000439293
10-2-2	Stellera chamaejasme				935	797	183	0	0	0	0		0	0
10-2-2	Geranium wilfordii	57	36	9	935	797	183	0.0609626	0.0451694	0.0491803	0.0517708	-2.96093	-0.15329	0.00268021
10-2-2	Gentiana scabra				935	797	183	0	0	0	0		0	0
10-2-2	Gymnaconitum gymnandrum				935	797	183	0	0	0	0		0	0
10-2-2	Gentiana straminea				935	797	183	0	0	0	0		0	0
10-2-2	Iris lactea				935	797	183	0	0	0	0		0	0
10-2-2	Pedicularis sylvatica	13	8	2	935	797	183	0.0139037	0.0100376	0.010929	0.0116234	-4.45473	-0.0517793	0.000135105
10-2-2	Saussurea pulchra	22	24	6	935	797	183	0.0235294	0.0301129	0.0327869	0.0288097	-3.54704	-0.102189	0.000830001
10-2-2	Allium mongolicum	20	21	5	935	797	183	0.0213904	0.0263488	0.0273224	0.0250205	-3.68806	-0.0922772	0.000626027
10-2-2	Elsholtzia densa	21	15	3	935	797	183	0.0224599	0.0188206	0.0163934	0.0192246	-3.95156	-0.0759674	0.000369587
10-2-2	Taraxacum mongolicum				935	797	183	0	0	0	0		0	0
10-2-2	Lancea tibetica				935	797	183	0	0	0	0		0	0
10-2-2	Anaphalis lactea				935	797	183	0	0	0	0		0	0
10-2-2	Euphorbia esula				935	797	183	0	0	0	0		0	0
10-2-2	Carex myosuroides	92	66	10	935	797	183	0.0983957	0.0828105	0.0546448	0.078617	-2.54317	-0.199936	0.00618064
10-2-2	Daphne tangutica				935	797	183	0	0	0	0		0	0
10-2-2	Clematis florida				935	797	183	0	0	0	0		0	0
10-2-2	Knorringia sibirica	10	26	8	935	797	183	0.0106952	0.0326223	0.0437158	0.0290111	-3.54008	-0.102702	0.000841645
10-2-2	Ajania tenuifolia	14	16	6	935	797	183	0.0149733	0.0200753	0.0327869	0.0226118	-3.78928	-0.0856825	0.000511294
10-2-2	Thermopsis lupinoides	12	9	4	935	797	183	0.0128342	0.0112923	0.0218579	0.0153282	-4.17806	-0.064042	0.000234953
10-2-2	Artemisia capillaris	16	16	6	935	797	183	0.0171123	0.0200753	0.0327869	0.0233248	-3.75824	-0.0876602	0.000544047
10-2-2	Kali collinum				935	797	183	0	0	0	0		0	0
10-2-2	Aster tataricus	12	12	3	935	797	183	0.0128342	0.0150565	0.0163934	0.0147614	-4.21574	-0.0622301	0.000217898
10-2-2	Bare area		6
10-2-3	Aster altaicus	14	13	5	1285	1268	247	0.0108949	0.0102524	0.0202429	0.0137967	-4.28332	-0.0590959	0.00019035	3.58352	36	3.38609	0.944907	0.0390272
10-2-3	Leontopodium nanum	18	15	8	1285	1268	247	0.0140078	0.0118297	0.0323887	0.0194087	-3.94203	-0.0765098	0.000376698
10-2-3	Artemisia argyi	14	12	4	1285	1268	247	0.0108949	0.00946372	0.0161943	0.0121843	-4.4076	-0.0537037	0.000148458
10-2-3	Artemisia stechmanniana	20	13	3	1285	1268	247	0.0155642	0.0102524	0.0121457	0.0126541	-4.36977	-0.0552956	0.000160126
10-2-3	Gentianopsis barbata	14	10	2	1285	1268	247	0.0108949	0.00788644	0.00809717	0.00895951	-4.71504	-0.0422445	8.02729e-05
10-2-3	Agropyron cristatum	101	91	10	1285	1268	247	0.0785992	0.0717666	0.0404858	0.0636172	-2.75487	-0.175257	0.00404715
10-2-3	Poa pratensis	101	81	10	1285	1268	247	0.0785992	0.0638801	0.0404858	0.0609884	-2.79707	-0.170589	0.00371958
10-2-3	Potentilla supina	83	71	10	1285	1268	247	0.0645914	0.0559937	0.0404858	0.0536903	-2.92452	-0.157019	0.00288265
10-2-3	Plantago asiatica	11	13	5	1285	1268	247	0.00856031	0.0102524	0.0202429	0.0130185	-4.34138	-0.0565184	0.000169482
10-2-3	Artemisia hedinii	13	9	4	1285	1268	247	0.0101167	0.00709779	0.0161943	0.0111363	-4.49755	-0.050086	0.000124017
10-2-3	Elymus nutans	76	68	9	1285	1268	247	0.059144	0.0536278	0.0364372	0.0497363	-3.00102	-0.14926	0.0024737
10-2-3	Cirsium arvense	20	15	5	1285	1268	247	0.0155642	0.0118297	0.0202429	0.0158789	-4.14276	-0.0657826	0.00025214
10-2-3	Gentiana dahurica	14	13	5	1285	1268	247	0.0108949	0.0102524	0.0202429	0.0137967	-4.28332	-0.0590959	0.00019035
10-2-3	Calystegia hederacea				1285	1268	247	0	0	0	0		0	0
10-2-3	Cirsium spicatum				1285	1268	247	0	0	0	0		0	0
10-2-3	Sanguisorba officinalis				1285	1268	247	0	0	0	0		0	0
10-2-3	Androsace umbellata	14	12	3	1285	1268	247	0.0108949	0.00946372	0.0121457	0.0108348	-4.52499	-0.0490274	0.000117393
10-2-3	Cicuta virosa				1285	1268	247	0	0	0	0		0	0
10-2-3	Stipa breviflora	77	72	10	1285	1268	247	0.0599222	0.0567823	0.0404858	0.0523968	-2.94891	-0.154513	0.00274542
10-2-3	Carduus nutans				1285	1268	247	0	0	0	0		0	0
10-2-3	Oxytropis kansuensis	68	52	9	1285	1268	247	0.0529183	0.0410095	0.0364372	0.043455	-3.13603	-0.136276	0.00188834
10-2-3	Tibetia himalaica				1285	1268	247	0	0	0	0		0	0
10-2-3	Festuca elata	103	91	9	1285	1268	247	0.0801556	0.0717666	0.0364372	0.0627865	-2.76802	-0.173794	0.00394214
10-2-3	Medicago ruthenica	51	31	10	1285	1268	247	0.0396887	0.0244479	0.0404858	0.0348742	-3.35601	-0.117038	0.00121621
10-2-3	Scutellaria baicalensis	10	34	6	1285	1268	247	0.0077821	0.0268139	0.0242915	0.0196292	-3.93074	-0.0771571	0.000385304
10-2-3	Neotrinia splendens	4	16	4	1285	1268	247	0.00311284	0.0126183	0.0161943	0.0106418	-4.54296	-0.0483454	0.000113248
10-2-3	Ligularia sagitta		27	5	1285	1268	247	0	0.0212934	0.0202429	0.0138454	-4.2798	-0.0592557	0.000191696
10-2-3	Nepeta cataria	8	25	7	1285	1268	247	0.00622568	0.0197161	0.0283401	0.018094	-4.01218	-0.0725961	0.000327391
10-2-3	Dysphania schraderiana	21	27	6	1285	1268	247	0.0163424	0.0212934	0.0242915	0.0206424	-3.88041	-0.080101	0.00042611
10-2-3	Potentilla sericea	39	31	10	1285	1268	247	0.0303502	0.0244479	0.0404858	0.0317613	-3.44951	-0.109561	0.00100878
10-2-3	Ixeris polycephala	12	34	8	1285	1268	247	0.00933852	0.0268139	0.0323887	0.022847	-3.77893	-0.0863374	0.000521986
10-2-3	Stellera chamaejasme				1285	1268	247	0	0	0	0		0	0
10-2-3	Geranium wilfordii	84	46	10	1285	1268	247	0.0653696	0.0362776	0.0404858	0.0473777	-3.0496	-0.144483	0.00224465
10-2-3	Gentiana scabra				1285	1268	247	0	0	0	0		0	0
10-2-3	Gymnaconitum gymnandrum				1285	1268	247	0	0	0	0		0	0
10-2-3	Gentiana straminea				1285	1268	247	0	0	0	0		0	0
10-2-3	Iris lactea				1285	1268	247	0	0	0	0		0	0
10-2-3	Pedicularis sylvatica	18	12	4	1285	1268	247	0.0140078	0.00946372	0.0161943	0.0132219	-4.32588	-0.0571965	0.00017482
10-2-3	Saussurea pulchra	6	42	8	1285	1268	247	0.00466926	0.033123	0.0323887	0.0233937	-3.75529	-0.08785	0.000547263
10-2-3	Allium mongolicum		31	8	1285	1268	247	0	0.0244479	0.0323887	0.0189455	-3.96619	-0.0751415	0.000358933
10-2-3	Elsholtzia densa	36	25	6	1285	1268	247	0.0280156	0.0197161	0.0242915	0.0240077	-3.72938	-0.0895339	0.00057637
10-2-3	Taraxacum mongolicum				1285	1268	247	0	0	0	0		0	0
10-2-3	Lancea tibetica				1285	1268	247	0	0	0	0		0	0
10-2-3	Anaphalis lactea				1285	1268	247	0	0	0	0		0	0
10-2-3	Euphorbia esula				1285	1268	247	0	0	0	0		0	0
10-2-3	Carex myosuroides	119	90	10	1285	1268	247	0.092607	0.0709779	0.0404858	0.0680236	-2.6879	-0.182841	0.00462721
10-2-3	Daphne tangutica				1285	1268	247	0	0	0	0		0	0
10-2-3	Clematis florida				1285	1268	247	0	0	0	0		0	0
10-2-3	Knorringia sibirica	53	46	9	1285	1268	247	0.0412451	0.0362776	0.0364372	0.0379867	-3.27052	-0.124236	0.00144299
10-2-3	Ajania tenuifolia	22	27	7	1285	1268	247	0.0171206	0.0212934	0.0283401	0.0222514	-3.80535	-0.0846743	0.000495123
10-2-3	Thermopsis lupinoides	20	13	4	1285	1268	247	0.0155642	0.0102524	0.0161943	0.0140036	-4.26844	-0.0597736	0.000196102
10-2-3	Artemisia capillaris	4	27	8	1285	1268	247	0.00311284	0.0212934	0.0323887	0.0189316	-3.96692	-0.0751003	0.000358406
10-2-3	Kali collinum				1285	1268	247	0	0	0	0		0	0
10-2-3	Aster tataricus	17	19	6	1285	1268	247	0.0132296	0.0149842	0.0242915	0.0175018	-4.04545	-0.0708026	0.000306312
10-2-3	Bare area		14
10-3-1	Aster altaicus	18	14	5	998	933	200	0.0180361	0.0150054	0.025	0.0193471	-3.94521	-0.0763286	0.000374312	3.61092	37	3.37071	0.933477	0.0420159	38	3.40454	0.936002	0.0401432
10-3-1	Leontopodium nanum	19	12	5	998	933	200	0.0190381	0.0128617	0.025	0.0189666	-3.96508	-0.075204	0.000359732
10-3-1	Artemisia argyi	4	15	3	998	933	200	0.00400802	0.0160772	0.015	0.0116951	-4.44859	-0.0520265	0.000136774
10-3-1	Artemisia stechmanniana	20	12	3	998	933	200	0.0200401	0.0128617	0.015	0.0159673	-4.13721	-0.06606	0.000254954
10-3-1	Gentianopsis barbata				998	933	200	0	0	0	0		0	0
10-3-1	Agropyron cristatum	83	84	10	998	933	200	0.0831663	0.0900322	0.05	0.0743995	-2.59831	-0.193313	0.00553528
10-3-1	Poa pratensis	99	75	10	998	933	200	0.0991984	0.0803859	0.05	0.0765281	-2.5701	-0.196685	0.00585655
10-3-1	Potentilla supina	68	46	5	998	933	200	0.0681363	0.0493033	0.025	0.0474799	-3.04745	-0.144692	0.00225434
10-3-1	Plantago asiatica				998	933	200	0	0	0	0		0	0
10-3-1	Artemisia hedinii				998	933	200	0	0	0	0		0	0
10-3-1	Elymus nutans	57	37	9	998	933	200	0.0571142	0.039657	0.045	0.0472571	-3.05215	-0.144236	0.00223323
10-3-1	Cirsium arvense	14	15	3	998	933	200	0.0140281	0.0160772	0.015	0.0150351	-4.19737	-0.0631078	0.000226053
10-3-1	Gentiana dahurica	14	9	2	998	933	200	0.0140281	0.0096463	0.01	0.0112248	-4.48963	-0.0503951	0.000125996
10-3-1	Calystegia hederacea	12	11	4	998	933	200	0.012024	0.0117899	0.02	0.0146047	-4.22641	-0.0617253	0.000213296
10-3-1	Cirsium spicatum	13	7	3	998	933	200	0.0130261	0.00750268	0.015	0.0118429	-4.43603	-0.0525355	0.000140255
10-3-1	Sanguisorba officinalis	14	8	2	998	933	200	0.0140281	0.00857449	0.01	0.0108675	-4.52198	-0.0491427	0.000118103
10-3-1	Androsace umbellata	20	13	4	998	933	200	0.0200401	0.0139335	0.02	0.0179912	-4.01787	-0.0722864	0.000323684
10-3-1	Cicuta virosa	10	9	5	998	933	200	0.01002	0.0096463	0.025	0.0148888	-4.20715	-0.0626393	0.000221676
10-3-1	Stipa breviflora	66	50	10	998	933	200	0.0661323	0.0535906	0.05	0.0565743	-2.8722	-0.162493	0.00320065
10-3-1	Carduus nutans				998	933	200	0	0	0	0		0	0
10-3-1	Oxytropis kansuensis	6	37	9	998	933	200	0.00601202	0.039657	0.045	0.030223	-3.49915	-0.105755	0.000913431
10-3-1	Tibetia himalaica	18	9	4	998	933	200	0.0180361	0.0096463	0.02	0.0158941	-4.14181	-0.0658304	0.000252623
10-3-1	Festuca elata	99	82	7	998	933	200	0.0991984	0.0878885	0.035	0.074029	-2.6033	-0.19272	0.00548029
10-3-1	Medicago ruthenica	10	19	6	998	933	200	0.01002	0.0203644	0.03	0.0201282	-3.90564	-0.0786132	0.000405143
10-3-1	Scutellaria baicalensis	17	12	4	998	933	200	0.0170341	0.0128617	0.02	0.0166319	-4.09643	-0.0681316	0.000276621
10-3-1	Neotrinia splendens	4	15	3	998	933	200	0.00400802	0.0160772	0.015	0.0116951	-4.44859	-0.0520265	0.000136774
10-3-1	Ligularia sagitta	20	14	4	998	933	200	0.0200401	0.0150054	0.02	0.0183485	-3.99821	-0.073361	0.000336667
10-3-1	Nepeta cataria	8	22	7	998	933	200	0.00801603	0.0235798	0.035	0.0221986	-3.80772	-0.0845263	0.000492779
10-3-1	Dysphania schraderiana	4	25	6	998	933	200	0.00400802	0.0267953	0.03	0.0202678	-3.89872	-0.0790184	0.000410782
10-3-1	Potentilla sericea	42	26	9	998	933	200	0.0420842	0.0278671	0.045	0.0383171	-3.26186	-0.124985	0.0014682
10-3-1	Ixeris polycephala	7	19	3	998	933	200	0.00701403	0.0203644	0.015	0.0141261	-4.25973	-0.0601735	0.000199548
10-3-1	Stellera chamaejasme				998	933	200	0	0	0	0		0	0
10-3-1	Geranium wilfordii	39	23	10	998	933	200	0.0390782	0.0246517	0.05	0.0379099	-3.27254	-0.124062	0.00143716
10-3-1	Gentiana scabra				998	933	200	0	0	0	0		0	0
10-3-1	Gymnaconitum gymnandrum				998	933	200	0	0	0	0		0	0
10-3-1	Gentiana straminea				998	933	200	0	0	0	0		0	0
10-3-1	Iris lactea				998	933	200	0	0	0	0		0	0
10-3-1	Pedicularis sylvatica	16	10	4	998	933	200	0.0160321	0.0107181	0.02	0.0155834	-4.16155	-0.0648511	0.000242842
10-3-1	Saussurea pulchra	7	22	5	998	933	200	0.00701403	0.0235798	0.025	0.0185313	-3.98829	-0.0739083	0.000343409
10-3-1	Allium mongolicum	14	10	4	998	933	200	0.0140281	0.0107181	0.02	0.0149154	-4.20536	-0.0627246	0.000222469
10-3-1	Elsholtzia densa	4	8	3	998	933	200	0.00400802	0.00857449	0.015	0.00919417	-4.68919	-0.0431132	8.45327e-05
10-3-1	Taraxacum mongolicum				998	933	200	0	0	0	0		0	0
10-3-1	Lancea tibetica				998	933	200	0	0	0	0		0	0
10-3-1	Anaphalis lactea				998	933	200	0	0	0	0		0	0
10-3-1	Euphorbia esula				998	933	200	0	0	0	0		0	0
10-3-1	Carex myosuroides	96	85	10	998	933	200	0.0961924	0.091104	0.05	0.0790988	-2.53706	-0.200678	0.00625662
10-3-1	Daphne tangutica				998	933	200	0	0	0	0		0	0
10-3-1	Clematis florida				998	933	200	0	0	0	0		0	0
10-3-1	Knorringia sibirica	19	26	5	998	933	200	0.0190381	0.0278671	0.025	0.0239684	-3.73102	-0.0894265	0.000574484
10-3-1	Ajania tenuifolia	4	15	3	998	933	200	0.00400802	0.0160772	0.015	0.0116951	-4.44859	-0.0520265	0.000136774
10-3-1	Thermopsis lupinoides				998	933	200	0	0	0	0		0	0
10-3-1	Artemisia capillaris	16	16	7	998	933	200	0.0160321	0.017149	0.035	0.022727	-3.7842	-0.0860036	0.000516517
10-3-1	Kali collinum				998	933	200	0	0	0	0		0	0
10-3-1	Aster tataricus	17	10	4	998	933	200	0.0170341	0.0107181	0.02	0.0159174	-4.14034	-0.0659035	0.000253363
10-3-1	Bare area		11
10-3-2	Aster altaicus	18	12	7	833	830	206	0.0216086	0.0144578	0.0339806	0.023349	-3.7572	-0.0877269	0.000545177	3.66356	39	3.40591	0.929673	0.0410431
10-3-2	Leontopodium nanum	4	10	3	833	830	206	0.00480192	0.0120482	0.0145631	0.0104711	-4.55914	-0.0477391	0.000109643
10-3-2	Artemisia argyi	13	13	5	833	830	206	0.0156062	0.0156627	0.0242718	0.0185136	-3.98925	-0.0738553	0.000342753
10-3-2	Artemisia stechmanniana	17	10	4	833	830	206	0.0204082	0.0120482	0.0194175	0.0172913	-4.05755	-0.0701603	0.000298988
10-3-2	Gentianopsis barbata				833	830	206	0	0	0	0		0	0
10-3-2	Agropyron cristatum	68	75	10	833	830	206	0.0816327	0.0903614	0.0485437	0.0735126	-2.6103	-0.19189	0.0054041
10-3-2	Poa pratensis	9	57	10	833	830	206	0.0108043	0.0686747	0.0485437	0.0426742	-3.15416	-0.134601	0.00182109
10-3-2	Potentilla supina	61	46	9	833	830	206	0.0732293	0.0554217	0.0436893	0.0574468	-2.8569	-0.164119	0.00330013
10-3-2	Plantago asiatica	11	10	3	833	830	206	0.0132053	0.0120482	0.0145631	0.0132722	-4.32208	-0.0573635	0.000176151
10-3-2	Artemisia hedinii	12	7	4	833	830	206	0.0144058	0.00843373	0.0194175	0.0140857	-4.2626	-0.0600415	0.000198406
10-3-2	Elymus nutans	46	40	9	833	830	206	0.0552221	0.0481928	0.0436893	0.0490347	-3.01523	-0.147851	0.0024044
10-3-2	Cirsium arvense	12	13	6	833	830	206	0.0144058	0.0156627	0.0291262	0.0197315	-3.92554	-0.0774569	0.000389334
10-3-2	Gentiana dahurica	13	8	3	833	830	206	0.0156062	0.00963855	0.0145631	0.0132693	-4.3223	-0.0573539	0.000176074
10-3-2	Calystegia hederacea	14	10	3	833	830	206	0.0168067	0.0120482	0.0145631	0.0144727	-4.23549	-0.0612989	0.000209458
10-3-2	Cirsium spicatum				833	830	206	0	0	0	0		0	0
10-3-2	Sanguisorba officinalis				833	830	206	0	0	0	0		0	0
10-3-2	Androsace umbellata	17	11	4	833	830	206	0.0204082	0.013253	0.0194175	0.0176929	-4.03459	-0.0713836	0.000313038
10-3-2	Cicuta virosa	10	8	2	833	830	206	0.0120048	0.00963855	0.00970874	0.0104507	-4.56109	-0.0476665	0.000109217
10-3-2	Stipa breviflora	60	46	10	833	830	206	0.0720288	0.0554217	0.0485437	0.0586647	-2.83592	-0.166368	0.00344155
10-3-2	Carduus nutans	6	5	1	833	830	206	0.00720288	0.0060241	0.00485437	0.00602712	-5.11149	-0.0308075	3.63261e-05
10-3-2	Oxytropis kansuensis	37	30	8	833	830	206	0.0444178	0.0361446	0.038835	0.0397991	-3.22391	-0.128309	0.00158397
10-3-2	Tibetia himalaica	7	6	1	833	830	206	0.00840336	0.00722892	0.00485437	0.00682888	-4.98659	-0.0340529	4.66336e-05
10-3-2	Festuca elata	67	55	8	833	830	206	0.0804322	0.0662651	0.038835	0.0618441	-2.78314	-0.172121	0.00382469
10-3-2	Medicago ruthenica	6	16	7	833	830	206	0.00720288	0.0192771	0.0339806	0.0201535	-3.90438	-0.0786869	0.000406165
10-3-2	Scutellaria baicalensis	4	10	4	833	830	206	0.00480192	0.0120482	0.0194175	0.0120892	-4.41544	-0.0533792	0.000146149
10-3-2	Neotrinia splendens	13	13	3	833	830	206	0.0156062	0.0156627	0.0145631	0.0152773	-4.18139	-0.0638804	0.000233397
10-3-2	Ligularia sagitta	17	12	6	833	830	206	0.0204082	0.0144578	0.0291262	0.0213307	-3.84761	-0.0820723	0.000455
10-3-2	Nepeta cataria	4	18	4	833	830	206	0.00480192	0.0216867	0.0194175	0.015302	-4.17977	-0.063959	0.000234153
10-3-2	Dysphania schraderiana	21	21	4	833	830	206	0.0252101	0.0253012	0.0194175	0.0233096	-3.75889	-0.0876182	0.000543337
10-3-2	Potentilla sericea	36	25	9	833	830	206	0.0432173	0.0301205	0.0436893	0.039009	-3.24396	-0.126544	0.0015217
10-3-2	Ixeris polycephala	22	19	6	833	830	206	0.0264106	0.0228916	0.0291262	0.0261428	-3.64418	-0.0952691	0.000683445
10-3-2	Stellera chamaejasme				833	830	206	0	0	0	0		0	0
10-3-2	Geranium wilfordii	11	19	8	833	830	206	0.0132053	0.0228916	0.038835	0.0249773	-3.68979	-0.0921608	0.000623864
10-3-2	Gentiana scabra				833	830	206	0	0	0	0		0	0
10-3-2	Gymnaconitum gymnandrum				833	830	206	0	0	0	0		0	0
10-3-2	Gentiana straminea				833	830	206	0	0	0	0		0	0
10-3-2	Iris lactea				833	830	206	0	0	0	0		0	0
10-3-2	Pedicularis sylvatica	4	9	4	833	830	206	0.00480192	0.0108434	0.0194175	0.0116876	-4.44923	-0.0520007	0.0001366
10-3-2	Saussurea pulchra		18	8	833	830	206	0	0.0216867	0.038835	0.0201739	-3.90337	-0.0787461	0.000406986
10-3-2	Allium mongolicum	12	9	2	833	830	206	0.0144058	0.0108434	0.00970874	0.0116526	-4.45222	-0.0518801	0.000135784
10-3-2	Elsholtzia densa	13	7	2	833	830	206	0.0156062	0.00843373	0.00970874	0.0112496	-4.48743	-0.0504816	0.000126553
10-3-2	Taraxacum mongolicum				833	830	206	0	0	0	0		0	0
10-3-2	Lancea tibetica				833	830	206	0	0	0	0		0	0
10-3-2	Anaphalis lactea				833	830	206	0	0	0	0		0	0
10-3-2	Euphorbia esula				833	830	206	0	0	0	0		0	0
10-3-2	Carex myosuroides	111	88	10	833	830	206	0.133253	0.106024	0.0485437	0.0959404	-2.34403	-0.224887	0.00920455
10-3-2	Daphne tangutica				833	830	206	0	0	0	0		0	0
10-3-2	Clematis florida				833	830	206	0	0	0	0		0	0
10-3-2	Knorringia sibirica	16	22	6	833	830	206	0.0192077	0.026506	0.0291262	0.0249466	-3.69102	-0.0920785	0.000622335
10-3-2	Ajania tenuifolia	12	13	3	833	830	206	0.0144058	0.0156627	0.0145631	0.0148772	-4.20793	-0.0626021	0.00022133
10-3-2	Thermopsis lupinoides	11	6	2	833	830	206	0.0132053	0.00722892	0.00970874	0.0100476	-4.60042	-0.0462234	0.000100955
10-3-2	Artemisia capillaris	14	14	6	833	830	206	0.0168067	0.0168675	0.0291262	0.0209335	-3.86641	-0.0809373	0.00043821
10-3-2	Kali collinum				833	830	206	0	0	0	0		0	0
10-3-2	Aster tataricus	4	9	2	833	830	206	0.00480192	0.0108434	0.00970874	0.00845134	-4.77343	-0.0403419	7.14252e-05
10-3-2	Bare area		10
10-3-3	Aster altaicus	4	19	8	1302	1191	268	0.0030722	0.015953	0.0298507	0.016292	-4.11708	-0.0670754	0.000265428	3.63759	38	3.437	0.944858	0.0373705
10-3-3	Leontopodium nanum		16	6	1302	1191	268	0	0.0134341	0.0223881	0.0119407	-4.4278	-0.0528711	0.000142581
10-3-3	Artemisia argyi	21	21	5	1302	1191	268	0.016129	0.0176322	0.0186567	0.0174727	-4.04712	-0.0707139	0.000305294
10-3-3	Artemisia stechmanniana	7	16	6	1302	1191	268	0.00537634	0.0134341	0.0223881	0.0137328	-4.28797	-0.0588859	0.000188591
10-3-3	Gentianopsis barbata				1302	1191	268	0	0	0	0		0	0
10-3-3	Agropyron cristatum	103	87	10	1302	1191	268	0.0791091	0.0730479	0.0373134	0.0631568	-2.76213	-0.174448	0.00398878
10-3-3	Poa pratensis	89	78	10	1302	1191	268	0.0683564	0.0654912	0.0373134	0.0570537	-2.86376	-0.163388	0.00325512
10-3-3	Potentilla supina	82	67	9	1302	1191	268	0.06298	0.0562552	0.0335821	0.0509391	-2.97712	-0.151652	0.00259479
10-3-3	Plantago asiatica				1302	1191	268	0	0	0	0		0	0
10-3-3	Artemisia hedinii	17	10	4	1302	1191	268	0.0130568	0.00839631	0.0149254	0.0121262	-4.41239	-0.0535054	0.000147044
10-3-3	Elymus nutans	86	67	10	1302	1191	268	0.0660522	0.0562552	0.0373134	0.053207	-2.93357	-0.156086	0.00283098
10-3-3	Cirsium arvense	17	21	5	1302	1191	268	0.0130568	0.0176322	0.0186567	0.0164486	-4.10752	-0.0675629	0.000270556
10-3-3	Gentiana dahurica	17	12	3	1302	1191	268	0.0130568	0.0100756	0.011194	0.0114421	-4.47045	-0.0511516	0.000130923
10-3-3	Calystegia hederacea	4	15	6	1302	1191	268	0.0030722	0.0125945	0.0223881	0.0126849	-4.36734	-0.0553993	0.000160907
10-3-3	Cirsium spicatum	14	9	2	1302	1191	268	0.0107527	0.00755668	0.00746269	0.00859068	-4.75708	-0.0408665	7.37998e-05
10-3-3	Sanguisorba officinalis	18	10	2	1302	1191	268	0.0138249	0.00839631	0.00746269	0.00989463	-4.61576	-0.0456713	9.79036e-05
10-3-3	Androsace umbellata	8	18	8	1302	1191	268	0.00614439	0.0151134	0.0298507	0.0170362	-4.07242	-0.0693784	0.000290231
10-3-3	Cicuta virosa	12	12	3	1302	1191	268	0.00921659	0.0100756	0.011194	0.0101621	-4.58909	-0.0466347	0.000103268
10-3-3	Stipa breviflora	110	78	10	1302	1191	268	0.0844854	0.0654912	0.0373134	0.06243	-2.77371	-0.173163	0.00389751
10-3-3	Carduus nutans				1302	1191	268	0	0	0	0		0	0
10-3-3	Oxytropis kansuensis	50	54	9	1302	1191	268	0.0384025	0.0453401	0.0335821	0.0391082	-3.24142	-0.126766	0.00152945
10-3-3	Tibetia himalaica				1302	1191	268	0	0	0	0		0	0
10-3-3	Festuca elata	91	76	9	1302	1191	268	0.0698925	0.0638119	0.0335821	0.0557622	-2.88666	-0.160966	0.00310942
10-3-3	Medicago ruthenica	44	27	10	1302	1191	268	0.0337942	0.02267	0.0373134	0.0312592	-3.46544	-0.108327	0.000977138
10-3-3	Scutellaria baicalensis		16	7	1302	1191	268	0	0.0134341	0.0261194	0.0131845	-4.32871	-0.0570719	0.000173831
10-3-3	Neotrinia splendens	21	21	6	1302	1191	268	0.016129	0.0176322	0.0223881	0.0187164	-3.97835	-0.0744606	0.000350305
10-3-3	Ligularia sagitta	7	19	8	1302	1191	268	0.00537634	0.015953	0.0298507	0.01706	-4.07102	-0.0694517	0.000291044
10-3-3	Nepeta cataria	39	31	8	1302	1191	268	0.0299539	0.0260285	0.0298507	0.0286111	-3.55396	-0.101683	0.000818593
10-3-3	Dysphania schraderiana	6	36	9	1302	1191	268	0.00460829	0.0302267	0.0335821	0.0228057	-3.78074	-0.0862225	0.0005201
10-3-3	Potentilla sericea	62	37	10	1302	1191	268	0.047619	0.0310663	0.0373134	0.0386663	-3.25279	-0.125773	0.00149508
10-3-3	Ixeris polycephala	36	27	8	1302	1191	268	0.0276498	0.02267	0.0298507	0.0267235	-3.62221	-0.0967982	0.000714146
10-3-3	Stellera chamaejasme				1302	1191	268	0	0	0	0		0	0
10-3-3	Geranium wilfordii	53	33	9	1302	1191	268	0.0407066	0.0277078	0.0335821	0.0339988	-3.38143	-0.114965	0.00115592
10-3-3	Gentiana scabra				1302	1191	268	0	0	0	0		0	0
10-3-3	Gymnaconitum gymnandrum				1302	1191	268	0	0	0	0		0	0
10-3-3	Gentiana straminea				1302	1191	268	0	0	0	0		0	0
10-3-3	Iris lactea				1302	1191	268	0	0	0	0		0	0
10-3-3	Pedicularis sylvatica	21	14	7	1302	1191	268	0.016129	0.0117548	0.0261194	0.0180011	-4.01732	-0.0723162	0.000324039
10-3-3	Saussurea pulchra	38	31	9	1302	1191	268	0.0291859	0.0260285	0.0335821	0.0295988	-3.52002	-0.104188	0.000876091
10-3-3	Allium mongolicum	19	13	5	1302	1191	268	0.0145929	0.0109152	0.0186567	0.0147216	-4.21844	-0.0621022	0.000216726
10-3-3	Elsholtzia densa	21	10	6	1302	1191	268	0.016129	0.00839631	0.0223881	0.0156378	-4.15806	-0.065023	0.000244541
10-3-3	Taraxacum mongolicum				1302	1191	268	0	0	0	0		0	0
10-3-3	Lancea tibetica				1302	1191	268	0	0	0	0		0	0
10-3-3	Anaphalis lactea				1302	1191	268	0	0	0	0		0	0
10-3-3	Euphorbia esula				1302	1191	268	0	0	0	0		0	0
10-3-3	Carex myosuroides	114	86	10	1302	1191	268	0.0875576	0.0722082	0.0373134	0.0656931	-2.72276	-0.178867	0.00431558
10-3-3	Daphne tangutica				1302	1191	268	0	0	0	0		0	0
10-3-3	Clematis florida				1302	1191	268	0	0	0	0		0	0
10-3-3	Knorringia sibirica	7	35	9	1302	1191	268	0.00537634	0.0293871	0.0335821	0.0227818	-3.78179	-0.0861562	0.000519012
10-3-3	Ajania tenuifolia	18	19	5	1302	1191	268	0.0138249	0.015953	0.0186567	0.0161449	-4.12615	-0.0666162	0.000260657
10-3-3	Thermopsis lupinoides	4	7	4	1302	1191	268	0.0030722	0.00587741	0.0149254	0.00795833	-4.83354	-0.0384669	6.3335e-05
10-3-3	Artemisia capillaris	21	20	9	1302	1191	268	0.016129	0.0167926	0.0335821	0.0221679	-3.80911	-0.08444	0.000491416
10-3-3	Kali collinum				1302	1191	268	0	0	0	0		0	0
10-3-3	Aster tataricus	21	11	4	1302	1191	268	0.016129	0.00923594	0.0149254	0.0134301	-4.31026	-0.0578872	0.000180368
10-3-3	Bare area		12
8-1-1	Aster altaicus	43	18	8	627	532	120	0.0685805	0.0338346	0.0666667	0.0563606	-2.87598	-0.162092	0.00317652	3.4012	30	3.14095	0.923483	0.0514944	30	3.15077	0.927266	0.0504977	30	3.16181	0.930533	0.0492032
8-1-1	Leontopodium nanum	12	4	5	627	532	120	0.0191388	0.0075188	0.0416667	0.0227747	-3.7821	-0.0861364	0.000518689
8-1-1	Artemisia argyi	8	11	2	627	532	120	0.0127592	0.0206767	0.0166667	0.0167008	-4.0923	-0.0683448	0.000278918
8-1-1	Artemisia stechmanniana	7	3	2	627	532	120	0.0111643	0.0056391	0.0166667	0.0111567	-4.49572	-0.0501573	0.000124471
8-1-1	Gentianopsis barbata				627	532	120	0	0	0	0		0	0
8-1-1	Agropyron cristatum	70	44	8	627	532	120	0.111643	0.0827068	0.0666667	0.0870054	-2.44179	-0.212448	0.00756994
8-1-1	Poa pratensis	12	6	4	627	532	120	0.0191388	0.0112782	0.0333333	0.0212501	-3.85139	-0.0818425	0.000451567
8-1-1	Potentilla supina	36	25	4	627	532	120	0.0574163	0.0469925	0.0333333	0.045914	-3.08098	-0.14146	0.0021081
8-1-1	Plantago asiatica	3	2	2	627	532	120	0.00478469	0.0037594	0.0166667	0.00840358	-4.7791	-0.0401615	7.06202e-05
8-1-1	Artemisia hedinii	4	8	3	627	532	120	0.00637959	0.0150376	0.025	0.0154724	-4.1687	-0.0644997	0.000239395
8-1-1	Elymus nutans	32	16	3	627	532	120	0.0510367	0.0300752	0.025	0.0353706	-3.34187	-0.118204	0.00125108
8-1-1	Cirsium arvense	6	4	2	627	532	120	0.00956938	0.0075188	0.0166667	0.0112516	-4.48724	-0.0504887	0.000126599
8-1-1	Gentiana dahurica				627	532	120	0	0	0	0		0	0
8-1-1	Calystegia hederacea				627	532	120	0	0	0	0		0	0
8-1-1	Cirsium spicatum				627	532	120	0	0	0	0		0	0
8-1-1	Sanguisorba officinalis	3	2	1	627	532	120	0.00478469	0.0037594	0.00833333	0.00562581	-5.18039	-0.0291439	3.16497e-05
8-1-1	Androsace umbellata				627	532	120	0	0	0	0		0	0
8-1-1	Cicuta virosa				627	532	120	0	0	0	0		0	0
8-1-1	Stipa breviflora	42	36	9	627	532	120	0.0669856	0.0676692	0.075	0.0698849	-2.66091	-0.185957	0.0048839
8-1-1	Carduus nutans				627	532	120	0	0	0	0		0	0
8-1-1	Oxytropis kansuensis	12	28	7	627	532	120	0.0191388	0.0526316	0.0583333	0.0433679	-3.13804	-0.13609	0.00188077
8-1-1	Tibetia himalaica				627	532	120	0	0	0	0		0	0
8-1-1	Festuca elata				627	532	120	0	0	0	0		0	0
8-1-1	Medicago ruthenica	21	32	3	627	532	120	0.0334928	0.0601504	0.025	0.0395477	-3.23025	-0.127749	0.00156402
8-1-1	Scutellaria baicalensis				627	532	120	0	0	0	0		0	0
8-1-1	Neotrinia splendens				627	532	120	0	0	0	0		0	0
8-1-1	Ligularia sagitta				627	532	120	0	0	0	0		0	0
8-1-1	Nepeta cataria	8	11	1	627	532	120	0.0127592	0.0206767	0.00833333	0.0139231	-4.27421	-0.0595101	0.000193852
8-1-1	Dysphania schraderiana				627	532	120	0	0	0	0		0	0
8-1-1	Potentilla sericea	11	12	4	627	532	120	0.0175439	0.0225564	0.0333333	0.0244779	-3.70999	-0.0908125	0.000599166
8-1-1	Ixeris polycephala				627	532	120	0	0	0	0		0	0
8-1-1	Stellera chamaejasme				627	532	120	0	0	0	0		0	0
8-1-1	Geranium wilfordii	34	29	5	627	532	120	0.0542265	0.0545113	0.0416667	0.0501348	-2.99304	-0.150055	0.0025135
8-1-1	Gentiana scabra				627	532	120	0	0	0	0		0	0
8-1-1	Gymnaconitum gymnandrum	17	9	3	627	532	120	0.0271132	0.0169173	0.025	0.0230102	-3.77182	-0.0867902	0.000529468
8-1-1	Gentiana straminea	9	15	3	627	532	120	0.0143541	0.0281955	0.025	0.0225165	-3.79351	-0.0854166	0.000506994
8-1-1	Iris lactea				627	532	120	0	0	0	0		0	0
8-1-1	Pedicularis sylvatica				627	532	120	0	0	0	0		0	0
8-1-1	Saussurea pulchra	12	10	3	627	532	120	0.0191388	0.018797	0.025	0.0209786	-3.86425	-0.0810666	0.000440101
8-1-1	Allium mongolicum	32	28	7	627	532	120	0.0510367	0.0526316	0.0583333	0.0540005	-2.91876	-0.157615	0.00291606
8-1-1	Elsholtzia densa				627	532	120	0	0	0	0		0	0
8-1-1	Taraxacum mongolicum	27	20	3	627	532	120	0.0430622	0.037594	0.025	0.0352187	-3.34618	-0.117848	0.00124036
8-1-1	Lancea tibetica	5	3	1	627	532	120	0.00797448	0.0056391	0.00833333	0.00731564	-4.91774	-0.0359764	5.35186e-05
8-1-1	Anaphalis lactea				627	532	120	0	0	0	0		0	0
8-1-1	Euphorbia esula				627	532	120	0	0	0	0		0	0
8-1-1	Carex myosuroides	96	76	7	627	532	120	0.15311	0.142857	0.0583333	0.1181	-2.13622	-0.252288	0.0139477
8-1-1	Daphne tangutica				627	532	120	0	0	0	0		0	0
8-1-1	Clematis florida	5	9	3	627	532	120	0.00797448	0.0169173	0.025	0.0166306	-4.09651	-0.0681274	0.000276577
8-1-1	Knorringia sibirica	28	22	5	627	532	120	0.0446571	0.0413534	0.0416667	0.042559	-3.15686	-0.134353	0.00181127
8-1-1	Ajania tenuifolia	12	16	4	627	532	120	0.0191388	0.0300752	0.0333333	0.0275158	-3.593	-0.098864	0.000757117
8-1-1	Thermopsis lupinoides	4	4	2	627	532	120	0.00637959	0.0075188	0.0166667	0.0101883	-4.58651	-0.046729	0.000103802
8-1-1	Artemisia capillaris	16	18	6	627	532	120	0.0255183	0.0338346	0.05	0.036451	-3.31179	-0.120718	0.00132867
8-1-1	Kali collinum				627	532	120	0	0	0	0		0	0
8-1-1	Aster tataricus				627	532	120	0	0	0	0		0	0
8-1-1	Bare area		11
8-1-2	Aster altaicus	32	14	7	452	389	96	0.0707965	0.0359897	0.0729167	0.0599009	-2.81506	-0.168625	0.00358812	3.29584	27	3.05918	0.928195	0.0559806
8-1-2	Leontopodium nanum	8	3	4	452	389	96	0.0176991	0.00771208	0.0416667	0.0223593	-3.80051	-0.0849768	0.000499938
8-1-2	Artemisia argyi	5	9	2	452	389	96	0.0110619	0.0231362	0.0208333	0.0183438	-3.99846	-0.0733471	0.000336497
8-1-2	Artemisia stechmanniana				452	389	96	0	0	0	0		0	0
8-1-2	Gentianopsis barbata				452	389	96	0	0	0	0		0	0
8-1-2	Agropyron cristatum	52	35	6	452	389	96	0.115044	0.0899743	0.0625	0.0891728	-2.41718	-0.215547	0.0079518
8-1-2	Poa pratensis	8	5	3	452	389	96	0.0176991	0.0128535	0.03125	0.0206009	-3.88242	-0.0799812	0.000424396
8-1-2	Potentilla supina	28	20	3	452	389	96	0.0619469	0.0514139	0.03125	0.0482036	-3.03232	-0.146169	0.00232359
8-1-2	Plantago asiatica				452	389	96	0	0	0	0		0	0
8-1-2	Artemisia hedinii	3	6	2	452	389	96	0.00663717	0.0154242	0.0208333	0.0142982	-4.24762	-0.0607334	0.000204439
8-1-2	Elymus nutans	25	13	2	452	389	96	0.0553097	0.033419	0.0208333	0.0365207	-3.30988	-0.120879	0.00133376
8-1-2	Cirsium arvense	4	3	2	452	389	96	0.00884956	0.00771208	0.0208333	0.012465	-4.38483	-0.0546569	0.000155376
8-1-2	Gentiana dahurica				452	389	96	0	0	0	0		0	0
8-1-2	Calystegia hederacea				452	389	96	0	0	0	0		0	0
8-1-2	Cirsium spicatum				452	389	96	0	0	0	0		0	0
8-1-2	Sanguisorba officinalis				452	389	96	0	0	0	0		0	0
8-1-2	Androsace umbellata				452	389	96	0	0	0	0		0	0
8-1-2	Cicuta virosa				452	389	96	0	0	0	0		0	0
8-1-2	Stipa breviflora	32	29	7	452	389	96	0.0707965	0.0745501	0.0729167	0.0727544	-2.62067	-0.190665	0.00529321
8-1-2	Carduus nutans				452	389	96	0	0	0	0		0	0
8-1-2	Oxytropis kansuensis	8	22	6	452	389	96	0.0176991	0.0565553	0.0625	0.0455848	-3.08818	-0.140774	0.00207797
8-1-2	Tibetia himalaica				452	389	96	0	0	0	0		0	0
8-1-2	Festuca elata				452	389	96	0	0	0	0		0	0
8-1-2	Medicago ruthenica	15	26	2	452	389	96	0.0331858	0.066838	0.0208333	0.0402857	-3.21176	-0.129388	0.00162294
8-1-2	Scutellaria baicalensis				452	389	96	0	0	0	0		0	0
8-1-2	Neotrinia splendens				452	389	96	0	0	0	0		0	0
8-1-2	Ligularia sagitta				452	389	96	0	0	0	0		0	0
8-1-2	Nepeta cataria	5	7	1	452	389	96	0.0110619	0.0179949	0.0104167	0.0131578	-4.33074	-0.0569831	0.000173128
8-1-2	Dysphania schraderiana				452	389	96	0	0	0	0		0	0
8-1-2	Potentilla sericea	8	9	3	452	389	96	0.0176991	0.0231362	0.03125	0.0240285	-3.72852	-0.0895905	0.000577367
8-1-2	Ixeris polycephala				452	389	96	0	0	0	0		0	0
8-1-2	Stellera chamaejasme				452	389	96	0	0	0	0		0	0
8-1-2	Geranium wilfordii	25	15	4	452	389	96	0.0553097	0.0385604	0.0416667	0.0451789	-3.09712	-0.139925	0.00204114
8-1-2	Gentiana scabra				452	389	96	0	0	0	0		0	0
8-1-2	Gymnaconitum gymnandrum	13	7	2	452	389	96	0.0287611	0.0179949	0.0208333	0.0225298	-3.79292	-0.0854535	0.00050759
8-1-2	Gentiana straminea	7	10	2	452	389	96	0.0154867	0.0257069	0.0208333	0.0206757	-3.8788	-0.0801967	0.000427483
8-1-2	Iris lactea				452	389	96	0	0	0	0		0	0
8-1-2	Pedicularis sylvatica				452	389	96	0	0	0	0		0	0
8-1-2	Saussurea pulchra	8	6	2	452	389	96	0.0176991	0.0154242	0.0208333	0.0179855	-4.01819	-0.0722693	0.00032348
8-1-2	Allium mongolicum	22	19	9	452	389	96	0.0486726	0.0488432	0.09375	0.0637553	-2.7527	-0.175499	0.00406473
8-1-2	Elsholtzia densa				452	389	96	0	0	0	0		0	0
8-1-2	Taraxacum mongolicum	20	15	2	452	389	96	0.0442478	0.0385604	0.0208333	0.0345472	-3.36543	-0.116266	0.00119351
8-1-2	Lancea tibetica	4	2	1	452	389	96	0.00884956	0.00514139	0.0104167	0.00813587	-4.81147	-0.0391455	6.61924e-05
8-1-2	Anaphalis lactea				452	389	96	0	0	0	0		0	0
8-1-2	Euphorbia esula				452	389	96	0	0	0	0		0	0
8-1-2	Carex myosuroides	71	56	8	452	389	96	0.15708	0.143959	0.0833333	0.128124	-2.05476	-0.263264	0.0164157
8-1-2	Daphne tangutica				452	389	96	0	0	0	0		0	0
8-1-2	Clematis florida	4	7	2	452	389	96	0.00884956	0.0179949	0.0208333	0.0158926	-4.1419	-0.0658255	0.000252574
8-1-2	Knorringia sibirica	20	18	4	452	389	96	0.0442478	0.0462725	0.0416667	0.0440623	-3.12215	-0.137569	0.00194149
8-1-2	Ajania tenuifolia	10	13	3	452	389	96	0.0221239	0.033419	0.03125	0.028931	-3.54284	-0.102498	0.000837001
8-1-2	Thermopsis lupinoides	3	3	2	452	389	96	0.00663717	0.00771208	0.0208333	0.0117275	-4.44582	-0.0521384	0.000137535
8-1-2	Artemisia capillaris	12	10	5	452	389	96	0.0265487	0.0257069	0.0520833	0.0347796	-3.35872	-0.116815	0.00120962
8-1-2	Kali collinum				452	389	96	0	0	0	0		0	0
8-1-2	Aster tataricus				452	389	96	0	0	0	0		0	0
8-1-2	Bare area		7
8-1-3	Aster altaicus	66	32	10	822	695	183	0.080292	0.0460432	0.0546448	0.0603266	-2.80798	-0.169396	0.0036393	3.49651	33	3.25217	0.930119	0.0440181
8-1-3	Leontopodium nanum	15	6	8	822	695	183	0.0182482	0.00863309	0.0437158	0.0235324	-3.74938	-0.0882318	0.000553773
8-1-3	Artemisia argyi	11	9	3	822	695	183	0.013382	0.0129496	0.0163934	0.0142417	-4.25158	-0.0605497	0.000202826
8-1-3	Artemisia stechmanniana	10	5	3	822	695	183	0.0121655	0.00719424	0.0163934	0.0119177	-4.42973	-0.0527922	0.000142032
8-1-3	Gentianopsis barbata	2	3	1	822	695	183	0.00243309	0.00431655	0.00546448	0.00407137	-5.50378	-0.0224079	1.65761e-05
8-1-3	Agropyron cristatum	78	62	10	822	695	183	0.0948905	0.0892086	0.0546448	0.0795813	-2.53098	-0.201418	0.00633319
8-1-3	Poa pratensis	18	9	6	822	695	183	0.0218978	0.0129496	0.0327869	0.0225448	-3.79225	-0.0854955	0.000508267
8-1-3	Potentilla supina	53	35	6	822	695	183	0.0644769	0.0503597	0.0327869	0.0492078	-3.0117	-0.148199	0.00242141
8-1-3	Plantago asiatica	5	3	3	822	695	183	0.00608273	0.00431655	0.0163934	0.0089309	-4.71824	-0.0421381	7.97611e-05
8-1-3	Artemisia hedinii	6	11	5	822	695	183	0.00729927	0.0158273	0.0273224	0.0168163	-4.0854	-0.0687015	0.000282789
8-1-3	Elymus nutans	45	21	5	822	695	183	0.0547445	0.0302158	0.0273224	0.0374276	-3.28535	-0.122963	0.00140082
8-1-3	Cirsium arvense	9	6	3	822	695	183	0.0109489	0.00863309	0.0163934	0.0119918	-4.42353	-0.0530462	0.000143804
8-1-3	Gentiana dahurica				822	695	183	0	0	0	0		0	0
8-1-3	Calystegia hederacea				822	695	183	0	0	0	0		0	0
8-1-3	Cirsium spicatum	3	2	1	822	695	183	0.00364964	0.0028777	0.00546448	0.00399727	-5.52214	-0.0220735	1.59782e-05
8-1-3	Sanguisorba officinalis	5	3	2	822	695	183	0.00608273	0.00431655	0.010929	0.00710941	-4.94634	-0.0351655	5.05437e-05
8-1-3	Androsace umbellata				822	695	183	0	0	0	0		0	0
8-1-3	Cicuta virosa				822	695	183	0	0	0	0		0	0
8-1-3	Stipa breviflora	57	49	10	822	695	183	0.0693431	0.0705036	0.0546448	0.0648305	-2.73598	-0.177375	0.00420299
8-1-3	Carduus nutans				822	695	183	0	0	0	0		0	0
8-1-3	Oxytropis kansuensis	17	28	10	822	695	183	0.0206813	0.0402878	0.0546448	0.0385379	-3.25611	-0.125484	0.00148517
8-1-3	Tibetia himalaica				822	695	183	0	0	0	0		0	0
8-1-3	Festuca elata				822	695	183	0	0	0	0		0	0
8-1-3	Medicago ruthenica	30	41	5	822	695	183	0.0364964	0.0589928	0.0273224	0.0409372	-3.19572	-0.130824	0.00167585
8-1-3	Scutellaria baicalensis				822	695	183	0	0	0	0		0	0
8-1-3	Neotrinia splendens	4	5	3	822	695	183	0.00486618	0.00719424	0.0163934	0.00948462	-4.65808	-0.0441802	8.99581e-05
8-1-3	Ligularia sagitta				822	695	183	0	0	0	0		0	0
8-1-3	Nepeta cataria	12	16	2	822	695	183	0.0145985	0.0230216	0.010929	0.016183	-4.12379	-0.0667354	0.00026189
8-1-3	Dysphania schraderiana				822	695	183	0	0	0	0		0	0
8-1-3	Potentilla sericea	17	18	6	822	695	183	0.0206813	0.0258993	0.0327869	0.0264558	-3.63228	-0.0960949	0.00069991
8-1-3	Ixeris polycephala				822	695	183	0	0	0	0		0	0
8-1-3	Stellera chamaejasme				822	695	183	0	0	0	0		0	0
8-1-3	Geranium wilfordii	44	37	8	822	695	183	0.053528	0.0532374	0.0437158	0.0501604	-2.99253	-0.150106	0.00251607
8-1-3	Gentiana scabra				822	695	183	0	0	0	0		0	0
8-1-3	Gymnaconitum gymnandrum	25	13	5	822	695	183	0.0304136	0.018705	0.0273224	0.0254804	-3.66985	-0.093509	0.000649249
8-1-3	Gentiana straminea	14	21	5	822	695	183	0.0170316	0.0302158	0.0273224	0.0248566	-3.69463	-0.091836	0.000617852
8-1-3	Iris lactea				822	695	183	0	0	0	0		0	0
8-1-3	Pedicularis sylvatica				822	695	183	0	0	0	0		0	0
8-1-3	Saussurea pulchra	18	15	5	822	695	183	0.0218978	0.0215827	0.0273224	0.023601	-3.74647	-0.0884203	0.000557006
8-1-3	Allium mongolicum	45	39	10	822	695	183	0.0547445	0.0561151	0.0546448	0.0551681	-2.89737	-0.159843	0.00304352
8-1-3	Elsholtzia densa				822	695	183	0	0	0	0		0	0
8-1-3	Taraxacum mongolicum	36	28	5	822	695	183	0.0437956	0.0402878	0.0273224	0.0371353	-3.29319	-0.122293	0.00137903
8-1-3	Lancea tibetica	8	5	2	822	695	183	0.00973236	0.00719424	0.010929	0.00928519	-4.67933	-0.0434485	8.62147e-05
8-1-3	Anaphalis lactea				822	695	183	0	0	0	0		0	0
8-1-3	Euphorbia esula				822	695	183	0	0	0	0		0	0
8-1-3	Carex myosuroides	75	64	10	822	695	183	0.0912409	0.0920863	0.0546448	0.079324	-2.53421	-0.201024	0.0062923
8-1-3	Daphne tangutica				822	695	183	0	0	0	0		0	0
8-1-3	Clematis florida	8	14	5	822	695	183	0.00973236	0.0201439	0.0273224	0.0190662	-3.95984	-0.0754991	0.000363521
8-1-3	Knorringia sibirica	39	28	8	822	695	183	0.0474453	0.0402878	0.0437158	0.0438163	-3.12775	-0.137046	0.00191987
8-1-3	Ajania tenuifolia	18	24	6	822	695	183	0.0218978	0.0345324	0.0327869	0.029739	-3.5153	-0.104541	0.00088441
8-1-3	Thermopsis lupinoides	6	6	3	822	695	183	0.00729927	0.00863309	0.0163934	0.0107753	-4.5305	-0.0488174	0.000116106
8-1-3	Artemisia capillaris	23	24	9	822	695	183	0.0279805	0.0345324	0.0491803	0.0372311	-3.29061	-0.122513	0.00138615
8-1-3	Kali collinum				822	695	183	0	0	0	0		0	0
8-1-3	Aster tataricus				822	695	183	0	0	0	0		0	0
8-1-3	Bare area		13
8-2-1	Aster altaicus	31	25	7	651	562	127	0.047619	0.044484	0.0551181	0.0490737	-3.01443	-0.147929	0.00240823	3.46574	32	3.16078	0.912009	0.0508101	30	3.15504	0.928508	0.0501188
8-2-1	Leontopodium nanum	21	10	6	651	562	127	0.0322581	0.0177936	0.0472441	0.0324319	-3.42861	-0.111196	0.00105183
8-2-1	Artemisia argyi	10	15	2	651	562	127	0.015361	0.0266904	0.015748	0.0192665	-3.94939	-0.0760908	0.000371197
8-2-1	Artemisia stechmanniana	6	4	3	651	562	127	0.00921659	0.00711744	0.023622	0.0133187	-4.31859	-0.0575179	0.000177388
8-2-1	Gentianopsis barbata				651	562	127	0	0	0	0		0	0
8-2-1	Agropyron cristatum	66	51	9	651	562	127	0.101382	0.0907473	0.0708661	0.0876653	-2.43423	-0.213397	0.00768521
8-2-1	Poa pratensis	10	7	5	651	562	127	0.015361	0.0124555	0.0393701	0.0223955	-3.79889	-0.0850782	0.00050156
8-2-1	Potentilla supina	35	20	5	651	562	127	0.0537634	0.0355872	0.0393701	0.0429069	-3.14872	-0.135102	0.001841
8-2-1	Plantago asiatica	4	2	1	651	562	127	0.00614439	0.00355872	0.00787402	0.00585904	-5.13977	-0.0301141	3.43284e-05
8-2-1	Artemisia hedinii	6	10	4	651	562	127	0.00921659	0.0177936	0.0314961	0.0195021	-3.93723	-0.0767843	0.000380331
8-2-1	Elymus nutans	30	15	3	651	562	127	0.0460829	0.0266904	0.023622	0.0321318	-3.43791	-0.110466	0.00103245
8-2-1	Cirsium arvense	8	6	1	651	562	127	0.0122888	0.0106762	0.00787402	0.0102797	-4.57759	-0.047056	0.000105671
8-2-1	Gentiana dahurica				651	562	127	0	0	0	0		0	0
8-2-1	Calystegia hederacea	4	1	2	651	562	127	0.00614439	0.00177936	0.015748	0.00789059	-4.84208	-0.0382069	6.22615e-05
8-2-1	Cirsium spicatum				651	562	127	0	0	0	0		0	0
8-2-1	Sanguisorba officinalis	1	1	1	651	562	127	0.0015361	0.00177936	0.00787402	0.00372982	-5.59139	-0.0208549	1.39116e-05
8-2-1	Androsace umbellata				651	562	127	0	0	0	0		0	0
8-2-1	Cicuta virosa				651	562	127	0	0	0	0		0	0
8-2-1	Stipa breviflora	55	47	10	651	562	127	0.0844854	0.0836299	0.0787402	0.0822852	-2.49756	-0.205512	0.00677085
8-2-1	Carduus nutans				651	562	127	0	0	0	0		0	0
8-2-1	Oxytropis kansuensis	28	30	8	651	562	127	0.0430108	0.0533808	0.0629921	0.0531279	-2.93505	-0.155933	0.00282257
8-2-1	Tibetia himalaica				651	562	127	0	0	0	0		0	0
8-2-1	Festuca elata				651	562	127	0	0	0	0		0	0
8-2-1	Medicago ruthenica	18	28	4	651	562	127	0.0276498	0.0498221	0.0314961	0.0363226	-3.31531	-0.120421	0.00131933
8-2-1	Scutellaria baicalensis				651	562	127	0	0	0	0		0	0
8-2-1	Neotrinia splendens				651	562	127	0	0	0	0		0	0
8-2-1	Ligularia sagitta				651	562	127	0	0	0	0		0	0
8-2-1	Nepeta cataria	9	7	1	651	562	127	0.0138249	0.0124555	0.00787402	0.0113848	-4.47548	-0.0509524	0.000129614
8-2-1	Dysphania schraderiana				651	562	127	0	0	0	0		0	0
8-2-1	Potentilla sericea	14	10	3	651	562	127	0.0215054	0.0177936	0.023622	0.0209737	-3.86449	-0.0810525	0.000439895
8-2-1	Ixeris polycephala				651	562	127	0	0	0	0		0	0
8-2-1	Stellera chamaejasme				651	562	127	0	0	0	0		0	0
8-2-1	Geranium wilfordii	30	25	6	651	562	127	0.0460829	0.044484	0.0472441	0.045937	-3.08048	-0.141508	0.00211021
8-2-1	Gentiana scabra				651	562	127	0	0	0	0		0	0
8-2-1	Gymnaconitum gymnandrum	15	10	4	651	562	127	0.0230415	0.0177936	0.0314961	0.0241104	-3.72511	-0.0898139	0.00058131
8-2-1	Gentiana straminea	8	10	2	651	562	127	0.0122888	0.0177936	0.015748	0.0152768	-4.18142	-0.0638787	0.000233381
8-2-1	Iris lactea				651	562	127	0	0	0	0		0	0
8-2-1	Pedicularis sylvatica				651	562	127	0	0	0	0		0	0
8-2-1	Saussurea pulchra	11	13	4	651	562	127	0.0168971	0.0231317	0.0314961	0.0238416	-3.73632	-0.0890799	0.000568422
8-2-1	Allium mongolicum	25	20	5	651	562	127	0.0384025	0.0355872	0.0393701	0.0377866	-3.2758	-0.123781	0.00142783
8-2-1	Elsholtzia densa				651	562	127	0	0	0	0		0	0
8-2-1	Taraxacum mongolicum	34	28	4	651	562	127	0.0522273	0.0498221	0.0314961	0.0445152	-3.11193	-0.138528	0.0019816
8-2-1	Lancea tibetica	4	2	2	651	562	127	0.00614439	0.00355872	0.015748	0.00848371	-4.76961	-0.040464	7.19734e-05
8-2-1	Anaphalis lactea				651	562	127	0	0	0	0		0	0
8-2-1	Euphorbia esula				651	562	127	0	0	0	0		0	0
8-2-1	Carex myosuroides	97	79	7	651	562	127	0.149002	0.140569	0.0551181	0.114896	-2.16372	-0.248604	0.0132012
8-2-1	Daphne tangutica				651	562	127	0	0	0	0		0	0
8-2-1	Clematis florida	7	8	2	651	562	127	0.0107527	0.0142349	0.015748	0.0135785	-4.29927	-0.0583777	0.000184377
8-2-1	Knorringia sibirica	22	28	4	651	562	127	0.0337942	0.0498221	0.0314961	0.0383708	-3.26046	-0.125106	0.00147232
8-2-1	Ajania tenuifolia	18	15	5	651	562	127	0.0276498	0.0266904	0.0393701	0.0312367	-3.46616	-0.108272	0.000975734
8-2-1	Thermopsis lupinoides	6	3	2	651	562	127	0.00921659	0.00533808	0.015748	0.0101009	-4.59513	-0.046415	0.000102028
8-2-1	Artemisia capillaris	16	14	4	651	562	127	0.0245776	0.024911	0.0314961	0.0269949	-3.61211	-0.0975084	0.000728724
8-2-1	Kali collinum	2	2	1	651	562	127	0.0030722	0.00355872	0.00787402	0.00483498	-5.33188	-0.0257795	2.3377e-05
8-2-1	Aster tataricus				651	562	127	0	0	0	0		0	0
8-2-1	Bare area		16
8-2-2	Aster altaicus	28	23	6	500	430	96	0.056	0.0534884	0.0625	0.0573295	-2.85894	-0.163902	0.00328667	3.29584	27	3.08462	0.935913	0.0542754
8-2-2	Leontopodium nanum	17	8	5	500	430	96	0.034	0.0186047	0.0520833	0.034896	-3.35538	-0.117089	0.00121773
8-2-2	Artemisia argyi	8	12	2	500	430	96	0.016	0.027907	0.0208333	0.0215801	-3.83598	-0.0827809	0.000465701
8-2-2	Artemisia stechmanniana	5	3	2	500	430	96	0.01	0.00697674	0.0208333	0.0126034	-4.37379	-0.0551245	0.000158845
8-2-2	Gentianopsis barbata				500	430	96	0	0	0	0		0	0
8-2-2	Agropyron cristatum	51	43	7	500	430	96	0.102	0.1	0.0729167	0.0916389	-2.3899	-0.219008	0.00839769
8-2-2	Poa pratensis	8	6	4	500	430	96	0.016	0.0139535	0.0416667	0.0238734	-3.73499	-0.0891669	0.000569939
8-2-2	Potentilla supina	30	16	4	500	430	96	0.06	0.0372093	0.0416667	0.046292	-3.07279	-0.142245	0.00214295
8-2-2	Plantago asiatica				500	430	96	0	0	0	0		0	0
8-2-2	Artemisia hedinii	5	8	3	500	430	96	0.01	0.0186047	0.03125	0.0199516	-3.91445	-0.0780993	0.000398064
8-2-2	Elymus nutans	22	12	2	500	430	96	0.044	0.027907	0.0208333	0.0309134	-3.47656	-0.107473	0.000955641
8-2-2	Cirsium arvense	6	5	1	500	430	96	0.012	0.0116279	0.0104167	0.0113482	-4.4787	-0.0508251	0.000128781
8-2-2	Gentiana dahurica				500	430	96	0	0	0	0		0	0
8-2-2	Calystegia hederacea				500	430	96	0	0	0	0		0	0
8-2-2	Cirsium spicatum				500	430	96	0	0	0	0		0	0
8-2-2	Sanguisorba officinalis				500	430	96	0	0	0	0		0	0
8-2-2	Androsace umbellata				500	430	96	0	0	0	0		0	0
8-2-2	Cicuta virosa				500	430	96	0	0	0	0		0	0
8-2-2	Stipa breviflora	43	33	8	500	430	96	0.086	0.0767442	0.0833333	0.0820258	-2.50072	-0.205124	0.00672824
8-2-2	Carduus nutans				500	430	96	0	0	0	0		0	0
8-2-2	Oxytropis kansuensis	18	22	6	500	430	96	0.036	0.0511628	0.0625	0.0498876	-2.99798	-0.149562	0.00248877
8-2-2	Tibetia himalaica				500	430	96	0	0	0	0		0	0
8-2-2	Festuca elata				500	430	96	0	0	0	0		0	0
8-2-2	Medicago ruthenica	14	27	3	500	430	96	0.028	0.0627907	0.03125	0.0406802	-3.20201	-0.130259	0.00165488
8-2-2	Scutellaria baicalensis				500	430	96	0	0	0	0		0	0
8-2-2	Neotrinia splendens				500	430	96	0	0	0	0		0	0
8-2-2	Ligularia sagitta				500	430	96	0	0	0	0		0	0
8-2-2	Nepeta cataria	7	6	1	500	430	96	0.014	0.0139535	0.0104167	0.0127901	-4.35909	-0.055753	0.000163585
8-2-2	Dysphania schraderiana				500	430	96	0	0	0	0		0	0
8-2-2	Potentilla sericea	10	8	2	500	430	96	0.02	0.0186047	0.0208333	0.0198127	-3.92143	-0.077694	0.000392542
8-2-2	Ixeris polycephala				500	430	96	0	0	0	0		0	0
8-2-2	Stellera chamaejasme				500	430	96	0	0	0	0		0	0
8-2-2	Geranium wilfordii	21	20	5	500	430	96	0.042	0.0465116	0.0520833	0.046865	-3.06048	-0.14343	0.00219633
8-2-2	Gentiana scabra				500	430	96	0	0	0	0		0	0
8-2-2	Gymnaconitum gymnandrum	13	7	3	500	430	96	0.026	0.0162791	0.03125	0.0245097	-3.70869	-0.0908988	0.000600725
8-2-2	Gentiana straminea	6	8	2	500	430	96	0.012	0.0186047	0.0208333	0.017146	-4.06599	-0.0697155	0.000293985
8-2-2	Iris lactea				500	430	96	0	0	0	0		0	0
8-2-2	Pedicularis sylvatica				500	430	96	0	0	0	0		0	0
8-2-2	Saussurea pulchra	9	8	3	500	430	96	0.018	0.0186047	0.03125	0.0226182	-3.789	-0.0857004	0.000511584
8-2-2	Allium mongolicum	22	14	4	500	430	96	0.044	0.0325581	0.0416667	0.0394083	-3.23378	-0.127438	0.00155301
8-2-2	Elsholtzia densa				500	430	96	0	0	0	0		0	0
8-2-2	Taraxacum mongolicum	25	18	3	500	430	96	0.05	0.0418605	0.03125	0.0410368	-3.19329	-0.131042	0.00168402
8-2-2	Lancea tibetica				500	430	96	0	0	0	0		0	0
8-2-2	Anaphalis lactea				500	430	96	0	0	0	0		0	0
8-2-2	Euphorbia esula				500	430	96	0	0	0	0		0	0
8-2-2	Carex myosuroides	76	63	6	500	430	96	0.152	0.146512	0.0625	0.120337	-2.11746	-0.254809	0.014481
8-2-2	Daphne tangutica				500	430	96	0	0	0	0		0	0
8-2-2	Clematis florida	6	6	2	500	430	96	0.012	0.0139535	0.0208333	0.0155956	-4.16077	-0.0648897	0.000243223
8-2-2	Knorringia sibirica	18	22	3	500	430	96	0.036	0.0511628	0.03125	0.0394709	-3.23219	-0.127578	0.00155795
8-2-2	Ajania tenuifolia	14	12	4	500	430	96	0.028	0.027907	0.0416667	0.0325245	-3.42576	-0.111421	0.00105785
8-2-2	Thermopsis lupinoides	5	2	2	500	430	96	0.01	0.00465116	0.0208333	0.0118282	-4.43727	-0.0524848	0.000139905
8-2-2	Artemisia capillaris	13	12	3	500	430	96	0.026	0.027907	0.03125	0.0283857	-3.56187	-0.101106	0.000805746
8-2-2	Kali collinum				500	430	96	0	0	0	0		0	0
8-2-2	Aster tataricus				500	430	96	0	0	0	0		0	0
8-2-2	Bare area		6
8-2-3	Aster altaicus	51	43	10	872	716	182	0.0584862	0.0600559	0.0549451	0.0578291	-2.85026	-0.164828	0.0033442	3.43399	31	3.21971	0.937601	0.0452708
8-2-3	Leontopodium nanum	30	14	9	872	716	182	0.0344037	0.0195531	0.0494505	0.0344691	-3.36769	-0.116081	0.00118812
8-2-3	Artemisia argyi	15	23	3	872	716	182	0.0172018	0.0321229	0.0164835	0.0219361	-3.81962	-0.0837876	0.000481192
8-2-3	Artemisia stechmanniana	9	6	5	872	716	182	0.0103211	0.00837989	0.0274725	0.0153912	-4.17396	-0.0642422	0.000236888
8-2-3	Gentianopsis barbata				872	716	182	0	0	0	0		0	0
8-2-3	Agropyron cristatum	59	52	10	872	716	182	0.0676606	0.0726257	0.0549451	0.0650771	-2.73218	-0.177803	0.00423503
8-2-3	Poa pratensis	15	11	8	872	716	182	0.0172018	0.0153631	0.043956	0.025507	-3.6688	-0.0935801	0.000650607
8-2-3	Potentilla supina	57	28	8	872	716	182	0.065367	0.0391061	0.043956	0.0494764	-3.00626	-0.148739	0.00244791
8-2-3	Plantago asiatica	6	3	2	872	716	182	0.00688073	0.00418994	0.010989	0.00735323	-4.91262	-0.0361236	5.407e-05
8-2-3	Artemisia hedinii	9	15	6	872	716	182	0.0103211	0.0209497	0.032967	0.0214126	-3.84377	-0.0823053	0.0004585
8-2-3	Elymus nutans	43	21	5	872	716	182	0.0493119	0.0293296	0.0274725	0.0353714	-3.34185	-0.118206	0.00125113
8-2-3	Cirsium arvense	12	9	2	872	716	182	0.0137615	0.0125698	0.010989	0.0124401	-4.38683	-0.0545726	0.000154756
8-2-3	Gentiana dahurica				872	716	182	0	0	0	0		0	0
8-2-3	Calystegia hederacea	1	1	2	872	716	182	0.00114679	0.00139665	0.010989	0.00451082	-5.40128	-0.0243642	2.03475e-05
8-2-3	Cirsium spicatum				872	716	182	0	0	0	0		0	0
8-2-3	Sanguisorba officinalis	2	2	2	872	716	182	0.00229358	0.0027933	0.010989	0.00535863	-5.22905	-0.0280205	2.87149e-05
8-2-3	Androsace umbellata				872	716	182	0	0	0	0		0	0
8-2-3	Cicuta virosa				872	716	182	0	0	0	0		0	0
8-2-3	Stipa breviflora	79	65	10	872	716	182	0.0905963	0.0907821	0.0549451	0.0787745	-2.54117	-0.200179	0.00620542
8-2-3	Carduus nutans				872	716	182	0	0	0	0		0	0
8-2-3	Oxytropis kansuensis	42	37	10	872	716	182	0.0481651	0.051676	0.0549451	0.0515954	-2.96432	-0.152945	0.00266208
8-2-3	Tibetia himalaica				872	716	182	0	0	0	0		0	0
8-2-3	Festuca elata				872	716	182	0	0	0	0		0	0
8-2-3	Medicago ruthenica	31	29	6	872	716	182	0.0355505	0.0405028	0.032967	0.0363401	-3.31483	-0.120461	0.0013206
8-2-3	Scutellaria baicalensis				872	716	182	0	0	0	0		0	0
8-2-3	Neotrinia splendens				872	716	182	0	0	0	0		0	0
8-2-3	Ligularia sagitta				872	716	182	0	0	0	0		0	0
8-2-3	Nepeta cataria	13	11	2	872	716	182	0.0149083	0.0153631	0.010989	0.0137535	-4.28646	-0.0589537	0.000189158
8-2-3	Dysphania schraderiana				872	716	182	0	0	0	0		0	0
8-2-3	Potentilla sericea	20	15	5	872	716	182	0.0229358	0.0209497	0.0274725	0.023786	-3.73866	-0.0889277	0.000565774
8-2-3	Ixeris polycephala				872	716	182	0	0	0	0		0	0
8-2-3	Stellera chamaejasme				872	716	182	0	0	0	0		0	0
8-2-3	Geranium wilfordii	44	35	9	872	716	182	0.0504587	0.0488827	0.0494505	0.0495973	-3.00382	-0.148981	0.00245989
8-2-3	Gentiana scabra				872	716	182	0	0	0	0		0	0
8-2-3	Gymnaconitum gymnandrum	23	15	6	872	716	182	0.0263761	0.0209497	0.032967	0.0267643	-3.62069	-0.0969051	0.000716328
8-2-3	Gentiana straminea	12	15	3	872	716	182	0.0137615	0.0209497	0.0164835	0.0170649	-4.07073	-0.0694666	0.000291211
8-2-3	Iris lactea				872	716	182	0	0	0	0		0	0
8-2-3	Pedicularis sylvatica				872	716	182	0	0	0	0		0	0
8-2-3	Saussurea pulchra	15	18	6	872	716	182	0.0172018	0.0251397	0.032967	0.0251028	-3.68477	-0.0924983	0.000630153
8-2-3	Allium mongolicum	33	25	8	872	716	182	0.037844	0.0349162	0.043956	0.0389054	-3.24662	-0.126311	0.00151363
8-2-3	Elsholtzia densa				872	716	182	0	0	0	0		0	0
8-2-3	Taraxacum mongolicum	43	38	6	872	716	182	0.0493119	0.0530726	0.032967	0.0451172	-3.09849	-0.139795	0.00203556
8-2-3	Lancea tibetica	6	3	3	872	716	182	0.00688073	0.00418994	0.0164835	0.00918473	-4.69021	-0.0430783	8.43593e-05
8-2-3	Anaphalis lactea				872	716	182	0	0	0	0		0	0
8-2-3	Euphorbia esula				872	716	182	0	0	0	0		0	0
8-2-3	Carex myosuroides	98	68	10	872	716	182	0.112385	0.0949721	0.0549451	0.0874341	-2.43687	-0.213066	0.00764473
8-2-3	Daphne tangutica				872	716	182	0	0	0	0		0	0
8-2-3	Clematis florida	11	12	3	872	716	182	0.0126147	0.0167598	0.0164835	0.015286	-4.18082	-0.063908	0.000233662
8-2-3	Knorringia sibirica	32	41	6	872	716	182	0.0366972	0.0572626	0.032967	0.042309	-3.16276	-0.133813	0.00179005
8-2-3	Ajania tenuifolia	27	23	8	872	716	182	0.0309633	0.0321229	0.043956	0.0356808	-3.33314	-0.118929	0.00127312
8-2-3	Thermopsis lupinoides	9	5	3	872	716	182	0.0103211	0.00698324	0.0164835	0.0112626	-4.48627	-0.0505271	0.000126847
8-2-3	Artemisia capillaris	25	23	6	872	716	182	0.0286697	0.0321229	0.032967	0.0312532	-3.46563	-0.108312	0.000976764
8-2-3	Kali collinum				872	716	182	0	0	0	0		0	0
8-2-3	Aster tataricus				872	716	182	0	0	0	0		0	0
8-2-3	Bare area		10
8-3-1	Aster altaicus	34	21	8	689	585	151	0.0493469	0.0358974	0.0529801	0.0460748	-3.07749	-0.141795	0.00212289	3.49651	33	3.21373	0.919127	0.046589	30	3.17962	0.935824	0.046993
8-3-1	Leontopodium nanum	18	12	5	689	585	151	0.0261248	0.0205128	0.0331126	0.0265834	-3.62747	-0.0964305	0.000706678
8-3-1	Artemisia argyi	14	11	3	689	585	151	0.0203193	0.0188034	0.0198675	0.0196634	-3.929	-0.0772575	0.00038665
8-3-1	Artemisia stechmanniana	24	17	6	689	585	151	0.0348331	0.0290598	0.0397351	0.0345427	-3.36556	-0.116255	0.0011932
8-3-1	Gentianopsis barbata				689	585	151	0	0	0	0		0	0
8-3-1	Agropyron cristatum	56	49	10	689	585	151	0.0812772	0.0837607	0.0662252	0.0770877	-2.56281	-0.197561	0.00594251
8-3-1	Poa pratensis	15	12	7	689	585	151	0.0217707	0.0205128	0.0463576	0.029547	-3.52177	-0.104058	0.000873028
8-3-1	Potentilla supina	40	32	7	689	585	151	0.0580552	0.0547009	0.0463576	0.0530379	-2.93675	-0.155759	0.00281302
8-3-1	Plantago asiatica	3	1	1	689	585	151	0.00435414	0.0017094	0.00662252	0.00422868	-5.46586	-0.0231134	1.78818e-05
8-3-1	Artemisia hedinii	8	11	3	689	585	151	0.011611	0.0188034	0.0198675	0.0167607	-4.08872	-0.0685297	0.00028092
8-3-1	Elymus nutans	27	12	4	689	585	151	0.0391872	0.0205128	0.0264901	0.02873	-3.54981	-0.101986	0.000825415
8-3-1	Cirsium arvense	9	7	2	689	585	151	0.0130624	0.0119658	0.013245	0.0127578	-4.36162	-0.0556444	0.00016276
8-3-1	Gentiana dahurica				689	585	151	0	0	0	0		0	0
8-3-1	Calystegia hederacea				689	585	151	0	0	0	0		0	0
8-3-1	Cirsium spicatum	2	1	1	689	585	151	0.00290276	0.0017094	0.00662252	0.00374489	-5.58736	-0.0209241	1.40242e-05
8-3-1	Sanguisorba officinalis	2	3	2	689	585	151	0.00290276	0.00512821	0.013245	0.007092	-4.94879	-0.0350968	5.02964e-05
8-3-1	Androsace umbellata				689	585	151	0	0	0	0		0	0
8-3-1	Cicuta virosa				689	585	151	0	0	0	0		0	0
8-3-1	Stipa breviflora	55	57	10	689	585	151	0.0798258	0.0974359	0.0662252	0.0811623	-2.5113	-0.203823	0.00658732
8-3-1	Carduus nutans				689	585	151	0	0	0	0		0	0
8-3-1	Oxytropis kansuensis	28	21	7	689	585	151	0.0406386	0.0358974	0.0463576	0.0409646	-3.19505	-0.130884	0.00167809
8-3-1	Tibetia himalaica				689	585	151	0	0	0	0		0	0
8-3-1	Festuca elata				689	585	151	0	0	0	0		0	0
8-3-1	Medicago ruthenica	20	28	6	689	585	151	0.0290276	0.0478632	0.0397351	0.0388753	-3.2474	-0.126244	0.00151129
8-3-1	Scutellaria baicalensis				689	585	151	0	0	0	0		0	0
8-3-1	Neotrinia splendens	7	6	3	689	585	151	0.0101597	0.0102564	0.0198675	0.0134279	-4.31042	-0.0578798	0.000180308
8-3-1	Ligularia sagitta				689	585	151	0	0	0	0		0	0
8-3-1	Nepeta cataria	9	5	2	689	585	151	0.0130624	0.00854701	0.013245	0.0116182	-4.45519	-0.051761	0.000134981
8-3-1	Dysphania schraderiana				689	585	151	0	0	0	0		0	0
8-3-1	Potentilla sericea	15	14	4	689	585	151	0.0217707	0.0239316	0.0264901	0.0240641	-3.72703	-0.0896878	0.000579082
8-3-1	Ixeris polycephala				689	585	151	0	0	0	0		0	0
8-3-1	Stellera chamaejasme				689	585	151	0	0	0	0		0	0
8-3-1	Geranium wilfordii	32	21	7	689	585	151	0.0464441	0.0358974	0.0463576	0.0428997	-3.14889	-0.135087	0.00184039
8-3-1	Gentiana scabra				689	585	151	0	0	0	0		0	0
8-3-1	Gymnaconitum gymnandrum	15	12	5	689	585	151	0.0217707	0.0205128	0.0331126	0.025132	-3.68361	-0.0925766	0.000631619
8-3-1	Gentiana straminea	10	6	2	689	585	151	0.0145138	0.0102564	0.013245	0.0126717	-4.36838	-0.055355	0.000160573
8-3-1	Iris lactea				689	585	151	0	0	0	0		0	0
8-3-1	Pedicularis sylvatica				689	585	151	0	0	0	0		0	0
8-3-1	Saussurea pulchra	12	17	5	689	585	151	0.0174165	0.0290598	0.0331126	0.0265297	-3.62949	-0.0962892	0.000703822
8-3-1	Allium mongolicum	25	15	4	689	585	151	0.0362845	0.025641	0.0264901	0.0294719	-3.52432	-0.103868	0.00086859
8-3-1	Elsholtzia densa				689	585	151	0	0	0	0		0	0
8-3-1	Taraxacum mongolicum	26	31	6	689	585	151	0.0377358	0.0529915	0.0397351	0.0434875	-3.13528	-0.136345	0.00189116
8-3-1	Lancea tibetica	3	2	1	689	585	151	0.00435414	0.0034188	0.00662252	0.00479849	-5.33945	-0.0256213	2.30255e-05
8-3-1	Anaphalis lactea				689	585	151	0	0	0	0		0	0
8-3-1	Euphorbia esula				689	585	151	0	0	0	0		0	0
8-3-1	Carex myosuroides	87	75	8	689	585	151	0.12627	0.128205	0.0529801	0.102485	-2.27804	-0.233465	0.0105032
8-3-1	Daphne tangutica				689	585	151	0	0	0	0		0	0
8-3-1	Clematis florida	12	10	3	689	585	151	0.0174165	0.017094	0.0198675	0.018126	-4.01041	-0.0726928	0.000328553
8-3-1	Knorringia sibirica	25	20	5	689	585	151	0.0362845	0.034188	0.0331126	0.0345284	-3.36597	-0.116222	0.00119221
8-3-1	Ajania tenuifolia	18	13	4	689	585	151	0.0261248	0.0222222	0.0264901	0.0249457	-3.69105	-0.0920759	0.000622288
8-3-1	Thermopsis lupinoides	4	3	1	689	585	151	0.00580552	0.00512821	0.00662252	0.00585208	-5.14096	-0.0300853	3.42468e-05
8-3-1	Artemisia capillaris	30	19	7	689	585	151	0.0435414	0.0324786	0.0463576	0.0407925	-3.19926	-0.130506	0.00166403
8-3-1	Kali collinum	4	3	2	689	585	151	0.00580552	0.00512821	0.013245	0.00805958	-4.82089	-0.0388544	6.49569e-05
8-3-1	Aster tataricus				689	585	151	0	0	0	0		0	0
8-3-1	Bare area		18
8-3-2	Aster altaicus	30	20	6	550	460	116	0.0545455	0.0434783	0.0517241	0.049916	-2.99741	-0.149619	0.0024916	3.3673	29	3.14442	0.933811	0.0491711
8-3-2	Leontopodium nanum	13	10	4	550	460	116	0.0236364	0.0217391	0.0344828	0.0266194	-3.62611	-0.0965251	0.000708593
8-3-2	Artemisia argyi	10	9	2	550	460	116	0.0181818	0.0195652	0.0172414	0.0183295	-3.99925	-0.073304	0.00033597
8-3-2	Artemisia stechmanniana	18	14	5	550	460	116	0.0327273	0.0304348	0.0431034	0.0354218	-3.34043	-0.118324	0.00125471
8-3-2	Gentianopsis barbata				550	460	116	0	0	0	0		0	0
8-3-2	Agropyron cristatum	44	38	8	550	460	116	0.08	0.0826087	0.0689655	0.0771914	-2.56147	-0.197723	0.00595851
8-3-2	Poa pratensis	13	11	6	550	460	116	0.0236364	0.023913	0.0517241	0.0330912	-3.40849	-0.112791	0.00109503
8-3-2	Potentilla supina	32	28	6	550	460	116	0.0581818	0.0608696	0.0517241	0.0569252	-2.86602	-0.163149	0.00324048
8-3-2	Plantago asiatica	2	1	1	550	460	116	0.00363636	0.00217391	0.00862069	0.00481032	-5.33699	-0.0256726	2.31392e-05
8-3-2	Artemisia hedinii	6	9	2	550	460	116	0.0109091	0.0195652	0.0172414	0.0159052	-4.14111	-0.0658653	0.000252976
8-3-2	Elymus nutans	21	10	3	550	460	116	0.0381818	0.0217391	0.0258621	0.0285943	-3.55455	-0.10164	0.000817636
8-3-2	Cirsium arvense	7	6	2	550	460	116	0.0127273	0.0130435	0.0172414	0.0143374	-4.24489	-0.0608605	0.00020556
8-3-2	Gentiana dahurica				550	460	116	0	0	0	0		0	0
8-3-2	Calystegia hederacea				550	460	116	0	0	0	0		0	0
8-3-2	Cirsium spicatum				550	460	116	0	0	0	0		0	0
8-3-2	Sanguisorba officinalis				550	460	116	0	0	0	0		0	0
8-3-2	Androsace umbellata				550	460	116	0	0	0	0		0	0
8-3-2	Cicuta virosa				550	460	116	0	0	0	0		0	0
8-3-2	Stipa breviflora	45	40	8	550	460	116	0.0818182	0.0869565	0.0689655	0.0792467	-2.53519	-0.200905	0.00628005
8-3-2	Carduus nutans				550	460	116	0	0	0	0		0	0
8-3-2	Oxytropis kansuensis	23	18	6	550	460	116	0.0418182	0.0391304	0.0517241	0.0442243	-3.11848	-0.137913	0.00195578
8-3-2	Tibetia himalaica				550	460	116	0	0	0	0		0	0
8-3-2	Festuca elata				550	460	116	0	0	0	0		0	0
8-3-2	Medicago ruthenica	18	22	5	550	460	116	0.0327273	0.0478261	0.0431034	0.0412189	-3.18886	-0.131441	0.001699
8-3-2	Scutellaria baicalensis				550	460	116	0	0	0	0		0	0
8-3-2	Neotrinia splendens				550	460	116	0	0	0	0		0	0
8-3-2	Ligularia sagitta				550	460	116	0	0	0	0		0	0
8-3-2	Nepeta cataria	8	4	2	550	460	116	0.0145455	0.00869565	0.0172414	0.0134942	-4.3055	-0.0580991	0.000182092
8-3-2	Dysphania schraderiana				550	460	116	0	0	0	0		0	0
8-3-2	Potentilla sericea	13	12	3	550	460	116	0.0236364	0.026087	0.0258621	0.0251951	-3.6811	-0.0927459	0.000634795
8-3-2	Ixeris polycephala				550	460	116	0	0	0	0		0	0
8-3-2	Stellera chamaejasme				550	460	116	0	0	0	0		0	0
8-3-2	Geranium wilfordii	27	17	6	550	460	116	0.0490909	0.0369565	0.0517241	0.0459239	-3.08077	-0.141481	0.002109
8-3-2	Gentiana scabra				550	460	116	0	0	0	0		0	0
8-3-2	Gymnaconitum gymnandrum	11	10	4	550	460	116	0.02	0.0217391	0.0344828	0.0254073	-3.67272	-0.0933139	0.000645531
8-3-2	Gentiana straminea	9	5	2	550	460	116	0.0163636	0.0108696	0.0172414	0.0148249	-4.21145	-0.0624342	0.000219776
8-3-2	Iris lactea				550	460	116	0	0	0	0		0	0
8-3-2	Pedicularis sylvatica				550	460	116	0	0	0	0		0	0
8-3-2	Saussurea pulchra	10	14	4	550	460	116	0.0181818	0.0304348	0.0344828	0.0276998	-3.58633	-0.0993406	0.000767278
8-3-2	Allium mongolicum	20	12	3	550	460	116	0.0363636	0.026087	0.0258621	0.0294376	-3.52548	-0.103782	0.00086657
8-3-2	Elsholtzia densa				550	460	116	0	0	0	0		0	0
8-3-2	Taraxacum mongolicum	21	26	5	550	460	116	0.0381818	0.0565217	0.0431034	0.0459357	-3.08051	-0.141505	0.00211009
8-3-2	Lancea tibetica	2	2	1	550	460	116	0.00363636	0.00434783	0.00862069	0.00553496	-5.19667	-0.0287634	3.06358e-05
8-3-2	Anaphalis lactea				550	460	116	0	0	0	0		0	0
8-3-2	Euphorbia esula				550	460	116	0	0	0	0		0	0
8-3-2	Carex myosuroides	73	61	6	550	460	116	0.132727	0.132609	0.0517241	0.105687	-2.24728	-0.237507	0.0111697
8-3-2	Daphne tangutica				550	460	116	0	0	0	0		0	0
8-3-2	Clematis florida	10	8	2	550	460	116	0.0181818	0.0173913	0.0172414	0.0176048	-4.03958	-0.0711162	0.00030993
8-3-2	Knorringia sibirica	22	16	4	550	460	116	0.04	0.0347826	0.0344828	0.0364218	-3.31259	-0.12065	0.00132655
8-3-2	Ajania tenuifolia	15	10	3	550	460	116	0.0272727	0.0217391	0.0258621	0.024958	-3.69056	-0.092109	0.000622901
8-3-2	Thermopsis lupinoides	3	2	1	550	460	116	0.00545455	0.00434783	0.00862069	0.00614102	-5.09276	-0.0312748	3.77121e-05
8-3-2	Artemisia capillaris	24	15	6	550	460	116	0.0436364	0.0326087	0.0517241	0.0426564	-3.15458	-0.134563	0.00181957
8-3-2	Kali collinum				550	460	116	0	0	0	0		0	0
8-3-2	Aster tataricus				550	460	116	0	0	0	0		0	0
8-3-2	Bare area		10
8-3-3	Aster altaicus	55	38	10	968	797	193	0.0568182	0.0476788	0.0518135	0.0521035	-2.95452	-0.153941	0.00271477	3.3322	28	3.1807	0.954534	0.0452188
8-3-3	Leontopodium nanum	26	18	8	968	797	193	0.0268595	0.0225847	0.0414508	0.0302983	-3.49666	-0.105943	0.000917988
8-3-3	Artemisia argyi	20	17	5	968	797	193	0.0206612	0.02133	0.0259067	0.0226326	-3.78836	-0.0857406	0.000512236
8-3-3	Artemisia stechmanniana	37	26	8	968	797	193	0.0382231	0.0326223	0.0414508	0.0374321	-3.28523	-0.122973	0.00140116
8-3-3	Gentianopsis barbata				968	797	193	0	0	0	0		0	0
8-3-3	Agropyron cristatum	84	68	9	968	797	193	0.0867769	0.0853199	0.0466321	0.0729096	-2.61853	-0.190916	0.00531582
8-3-3	Poa pratensis	25	21	10	968	797	193	0.0258264	0.0263488	0.0518135	0.0346629	-3.36209	-0.11654	0.00120152
8-3-3	Potentilla supina	61	50	8	968	797	193	0.0630165	0.0627353	0.0414508	0.0557342	-2.88716	-0.160914	0.0031063
8-3-3	Plantago asiatica	5	2	2	968	797	193	0.00516529	0.00250941	0.0103627	0.00601246	-5.11392	-0.0307473	3.61497e-05
8-3-3	Artemisia hedinii	12	17	5	968	797	193	0.0123967	0.02133	0.0259067	0.0198778	-3.91815	-0.0778843	0.000395127
8-3-3	Elymus nutans	38	18	6	968	797	193	0.0392562	0.0225847	0.0310881	0.0309763	-3.47453	-0.107628	0.000959533
8-3-3	Cirsium arvense	14	11	3	968	797	193	0.0144628	0.0138018	0.015544	0.0146029	-4.22654	-0.0617196	0.000213244
8-3-3	Gentiana dahurica				968	797	193	0	0	0	0		0	0
8-3-3	Calystegia hederacea				968	797	193	0	0	0	0		0	0
8-3-3	Cirsium spicatum				968	797	193	0	0	0	0		0	0
8-3-3	Sanguisorba officinalis				968	797	193	0	0	0	0		0	0
8-3-3	Androsace umbellata				968	797	193	0	0	0	0		0	0
8-3-3	Cicuta virosa				968	797	193	0	0	0	0		0	0
8-3-3	Stipa breviflora	72	81	9	968	797	193	0.0743802	0.101631	0.0466321	0.0742145	-2.6008	-0.193017	0.00550779
8-3-3	Carduus nutans				968	797	193	0	0	0	0		0	0
8-3-3	Oxytropis kansuensis	45	42	8	968	797	193	0.0464876	0.0526976	0.0414508	0.0468787	-3.06019	-0.143458	0.00219761
8-3-3	Tibetia himalaica				968	797	193	0	0	0	0		0	0
8-3-3	Festuca elata				968	797	193	0	0	0	0		0	0
8-3-3	Medicago ruthenica	32	42	9	968	797	193	0.0330579	0.0526976	0.0466321	0.0441292	-3.12063	-0.137711	0.00194739
8-3-3	Scutellaria baicalensis				968	797	193	0	0	0	0		0	0
8-3-3	Neotrinia splendens				968	797	193	0	0	0	0		0	0
8-3-3	Ligularia sagitta				968	797	193	0	0	0	0		0	0
8-3-3	Nepeta cataria	14	8	3	968	797	193	0.0144628	0.0100376	0.015544	0.0133482	-4.31638	-0.0576157	0.000178173
8-3-3	Dysphania schraderiana				968	797	193	0	0	0	0		0	0
8-3-3	Potentilla sericea	23	17	6	968	797	193	0.0237603	0.02133	0.0310881	0.0253928	-3.67329	-0.0932751	0.000644794
8-3-3	Ixeris polycephala				968	797	193	0	0	0	0		0	0
8-3-3	Stellera chamaejasme				968	797	193	0	0	0	0		0	0
8-3-3	Geranium wilfordii	54	32	9	968	797	193	0.0557851	0.0401506	0.0466321	0.0475226	-3.04655	-0.14478	0.0022584
8-3-3	Gentiana scabra				968	797	193	0	0	0	0		0	0
8-3-3	Gymnaconitum gymnandrum	22	18	8	968	797	193	0.0227273	0.0225847	0.0414508	0.0289209	-3.54319	-0.102472	0.000836419
8-3-3	Gentiana straminea	17	9	3	968	797	193	0.017562	0.0112923	0.015544	0.0147995	-4.21316	-0.0623526	0.000219024
8-3-3	Iris lactea				968	797	193	0	0	0	0		0	0
8-3-3	Pedicularis sylvatica				968	797	193	0	0	0	0		0	0
8-3-3	Saussurea pulchra	19	24	8	968	797	193	0.0196281	0.0301129	0.0414508	0.0303973	-3.4934	-0.10619	0.000923994
8-3-3	Allium mongolicum	35	23	6	968	797	193	0.036157	0.0288582	0.0310881	0.0320344	-3.44094	-0.110229	0.00102621
8-3-3	Elsholtzia densa				968	797	193	0	0	0	0		0	0
8-3-3	Taraxacum mongolicum	41	33	9	968	797	193	0.0423554	0.0414053	0.0466321	0.0434643	-3.13582	-0.136296	0.00188914
8-3-3	Lancea tibetica	5	3	2	968	797	193	0.00516529	0.00376412	0.0103627	0.0064307	-5.04667	-0.0324536	4.13539e-05
8-3-3	Anaphalis lactea				968	797	193	0	0	0	0		0	0
8-3-3	Euphorbia esula				968	797	193	0	0	0	0		0	0
8-3-3	Carex myosuroides	76	81	10	968	797	193	0.0785124	0.101631	0.0518135	0.077319	-2.55982	-0.197922	0.00597823
8-3-3	Daphne tangutica				968	797	193	0	0	0	0		0	0
8-3-3	Clematis florida	18	15	5	968	797	193	0.018595	0.0188206	0.0259067	0.0211075	-3.85813	-0.0814353	0.000445525
8-3-3	Knorringia sibirica	40	28	8	968	797	193	0.0413223	0.0351317	0.0414508	0.0393016	-3.23649	-0.127199	0.00154462
8-3-3	Ajania tenuifolia	30	17	6	968	797	193	0.0309917	0.02133	0.0310881	0.0278033	-3.5826	-0.099608	0.000773022
8-3-3	Thermopsis lupinoides				968	797	193	0	0	0	0		0	0
8-3-3	Artemisia capillaris	48	27	10	968	797	193	0.0495868	0.033877	0.0518135	0.0450924	-3.09904	-0.139743	0.00203333
8-3-3	Kali collinum				968	797	193	0	0	0	0		0	0
8-3-3	Aster tataricus				968	797	193	0	0	0	0		0	0
8-3-3	Bare area		11
6-1-1	Aster altaicus	12	21	3	535	518	118	0.0224299	0.0405405	0.0254237	0.0294647	-3.52456	-0.10385	0.00086817	3.3322	28	3.09024	0.927386	0.054245	28	3.10631	0.932666	0.0520114	28	3.11024	0.934307	0.0506929
6-1-1	Leontopodium nanum	28	2	7	535	518	118	0.0523364	0.003861	0.059322	0.0385065	-3.25693	-0.125413	0.00148275
6-1-1	Artemisia argyi	8	15	3	535	518	118	0.0149533	0.0289575	0.0254237	0.0231115	-3.76742	-0.0870709	0.000534142
6-1-1	Artemisia stechmanniana	4	2	2	535	518	118	0.00747664	0.003861	0.0169492	0.00942893	-4.66397	-0.0439763	8.89047e-05
6-1-1	Gentianopsis barbata				535	518	118	0	0	0	0		0	0
6-1-1	Agropyron cristatum	73	32	10	535	518	118	0.136449	0.0617761	0.0847458	0.0943235	-2.36103	-0.2227	0.00889692
6-1-1	Poa pratensis	8	11	5	535	518	118	0.0149533	0.0212355	0.0423729	0.0261872	-3.64248	-0.0953865	0.000685771
6-1-1	Potentilla supina	28	20	4	535	518	118	0.0523364	0.03861	0.0338983	0.0416149	-3.1793	-0.132306	0.0017318
6-1-1	Plantago asiatica	1	1	1	535	518	118	0.00186916	0.0019305	0.00847458	0.00409141	-5.49887	-0.0224981	1.67397e-05
6-1-1	Artemisia hedinii	6	10	4	535	518	118	0.011215	0.019305	0.0338983	0.0214728	-3.84097	-0.0824762	0.000461079
6-1-1	Elymus nutans	16	12	2	535	518	118	0.0299065	0.023166	0.0169492	0.0233406	-3.75756	-0.0877037	0.000544782
6-1-1	Cirsium arvense	3	4	3	535	518	118	0.00560748	0.00772201	0.0254237	0.0129177	-4.34915	-0.0561812	0.000166868
6-1-1	Gentiana dahurica				535	518	118	0	0	0	0		0	0
6-1-1	Calystegia hederacea				535	518	118	0	0	0	0		0	0
6-1-1	Cirsium spicatum				535	518	118	0	0	0	0		0	0
6-1-1	Sanguisorba officinalis				535	518	118	0	0	0	0		0	0
6-1-1	Androsace umbellata	4	5	1	535	518	118	0.00747664	0.00965251	0.00847458	0.00853457	-4.76363	-0.0406556	7.2839e-05
6-1-1	Cicuta virosa				535	518	118	0	0	0	0		0	0
6-1-1	Stipa breviflora	40	42	5	535	518	118	0.0747664	0.0810811	0.0423729	0.0660734	-2.71699	-0.179521	0.0043657
6-1-1	Carduus nutans				535	518	118	0	0	0	0		0	0
6-1-1	Oxytropis kansuensis	8	10	3	535	518	118	0.0149533	0.019305	0.0254237	0.019894	-3.91734	-0.0779315	0.000395771
6-1-1	Tibetia himalaica				535	518	118	0	0	0	0		0	0
6-1-1	Festuca elata				535	518	118	0	0	0	0		0	0
6-1-1	Medicago ruthenica	36	28	5	535	518	118	0.0672897	0.0540541	0.0423729	0.0545722	-2.90823	-0.158709	0.00297813
6-1-1	Scutellaria baicalensis				535	518	118	0	0	0	0		0	0
6-1-1	Neotrinia splendens				535	518	118	0	0	0	0		0	0
6-1-1	Ligularia sagitta				535	518	118	0	0	0	0		0	0
6-1-1	Nepeta cataria				535	518	118	0	0	0	0		0	0
6-1-1	Dysphania schraderiana				535	518	118	0	0	0	0		0	0
6-1-1	Potentilla sericea	8	12	4	535	518	118	0.0149533	0.023166	0.0338983	0.0240059	-3.72946	-0.0895288	0.000576282
6-1-1	Ixeris polycephala				535	518	118	0	0	0	0		0	0
6-1-1	Stellera chamaejasme	8	12	3	535	518	118	0.0149533	0.023166	0.0254237	0.021181	-3.85465	-0.0816454	0.000448635
6-1-1	Geranium wilfordii	14	21	7	535	518	118	0.0261682	0.0405405	0.059322	0.0420103	-3.16984	-0.133166	0.00176486
6-1-1	Gentiana scabra				535	518	118	0	0	0	0		0	0
6-1-1	Gymnaconitum gymnandrum				535	518	118	0	0	0	0		0	0
6-1-1	Gentiana straminea				535	518	118	0	0	0	0		0	0
6-1-1	Iris lactea				535	518	118	0	0	0	0		0	0
6-1-1	Pedicularis sylvatica				535	518	118	0	0	0	0		0	0
6-1-1	Saussurea pulchra	18	22	4	535	518	118	0.0336449	0.042471	0.0338983	0.0366714	-3.30576	-0.121227	0.00134479
6-1-1	Allium mongolicum	12	8	5	535	518	118	0.0224299	0.015444	0.0423729	0.0267489	-3.62126	-0.0968649	0.000715505
6-1-1	Elsholtzia densa				535	518	118	0	0	0	0		0	0
6-1-1	Taraxacum mongolicum	32	28	2	535	518	118	0.0598131	0.0540541	0.0169492	0.0436054	-3.13257	-0.136597	0.00190143
6-1-1	Lancea tibetica				535	518	118	0	0	0	0		0	0
6-1-1	Anaphalis lactea	12	5	5	535	518	118	0.0224299	0.00965251	0.0423729	0.0248184	-3.69617	-0.0917331	0.000615955
6-1-1	Euphorbia esula				535	518	118	0	0	0	0		0	0
6-1-1	Carex myosuroides	75	80	8	535	518	118	0.140187	0.15444	0.0677966	0.120808	-2.11355	-0.255334	0.0145945
6-1-1	Daphne tangutica	6	12	3	535	518	118	0.011215	0.023166	0.0254237	0.0199349	-3.91528	-0.0780508	0.0003974
6-1-1	Clematis florida				535	518	118	0	0	0	0		0	0
6-1-1	Knorringia sibirica	34	45	8	535	518	118	0.0635514	0.0868726	0.0677966	0.0727402	-2.62086	-0.190642	0.00529114
6-1-1	Ajania tenuifolia	16	21	4	535	518	118	0.0299065	0.0405405	0.0338983	0.0347818	-3.35866	-0.11682	0.00120977
6-1-1	Thermopsis lupinoides				535	518	118	0	0	0	0		0	0
6-1-1	Artemisia capillaris	21	23	6	535	518	118	0.0392523	0.0444015	0.0508475	0.0448338	-3.10479	-0.1392	0.00201007
6-1-1	Kali collinum				535	518	118	0	0	0	0		0	0
6-1-1	Aster tataricus	4	6	1	535	518	118	0.00747664	0.011583	0.00847458	0.00917807	-4.69094	-0.0430538	8.42371e-05
6-1-1	Bare area		8
6-1-2	Aster altaicus	10	17	2	422	417	91	0.0236967	0.0407674	0.021978	0.028814	-3.54689	-0.1022	0.000830248	3.2581	26	3.0424	0.933796	0.0550745
6-1-2	Leontopodium nanum	22	2	6	422	417	91	0.0521327	0.00479616	0.0659341	0.0409543	-3.1953	-0.130861	0.00167726
6-1-2	Artemisia argyi	6	12	2	422	417	91	0.014218	0.028777	0.021978	0.0216577	-3.8324	-0.0830008	0.000469055
6-1-2	Artemisia stechmanniana	3	2	2	422	417	91	0.007109	0.00479616	0.021978	0.0112944	-4.48345	-0.0506378	0.000127563
6-1-2	Gentianopsis barbata				422	417	91	0	0	0	0		0	0
6-1-2	Agropyron cristatum	58	26	8	422	417	91	0.137441	0.0623501	0.0879121	0.095901	-2.34444	-0.224834	0.009197
6-1-2	Poa pratensis	6	9	4	422	417	91	0.014218	0.0215827	0.043956	0.0265856	-3.62739	-0.0964362	0.000706794
6-1-2	Potentilla supina	22	16	3	422	417	91	0.0521327	0.0383693	0.032967	0.0411563	-3.19038	-0.131304	0.00169384
6-1-2	Plantago asiatica				422	417	91	0	0	0	0		0	0
6-1-2	Artemisia hedinii	5	8	3	422	417	91	0.0118483	0.0191847	0.032967	0.0213333	-3.84748	-0.0820797	0.000455111
6-1-2	Elymus nutans	13	10	2	422	417	91	0.0308057	0.0239808	0.021978	0.0255882	-3.66562	-0.0937967	0.000654755
6-1-2	Cirsium arvense	2	3	2	422	417	91	0.00473934	0.00719424	0.021978	0.0113039	-4.48261	-0.0506708	0.000127777
6-1-2	Gentiana dahurica				422	417	91	0	0	0	0		0	0
6-1-2	Calystegia hederacea				422	417	91	0	0	0	0		0	0
6-1-2	Cirsium spicatum				422	417	91	0	0	0	0		0	0
6-1-2	Sanguisorba officinalis				422	417	91	0	0	0	0		0	0
6-1-2	Androsace umbellata	3	4	1	422	417	91	0.007109	0.00959233	0.010989	0.00923011	-4.68528	-0.0432457	8.5195e-05
6-1-2	Cicuta virosa				422	417	91	0	0	0	0		0	0
6-1-2	Stipa breviflora	32	34	4	422	417	91	0.0758294	0.0815348	0.043956	0.0671067	-2.70147	-0.181287	0.00450331
6-1-2	Carduus nutans				422	417	91	0	0	0	0		0	0
6-1-2	Oxytropis kansuensis	6	8	2	422	417	91	0.014218	0.0191847	0.021978	0.0184602	-3.99214	-0.0736958	0.00034078
6-1-2	Tibetia himalaica				422	417	91	0	0	0	0		0	0
6-1-2	Festuca elata				422	417	91	0	0	0	0		0	0
6-1-2	Medicago ruthenica	29	22	4	422	417	91	0.0687204	0.0527578	0.043956	0.0551447	-2.89779	-0.159798	0.00304094
6-1-2	Scutellaria baicalensis				422	417	91	0	0	0	0		0	0
6-1-2	Neotrinia splendens				422	417	91	0	0	0	0		0	0
6-1-2	Ligularia sagitta				422	417	91	0	0	0	0		0	0
6-1-2	Nepeta cataria				422	417	91	0	0	0	0		0	0
6-1-2	Dysphania schraderiana				422	417	91	0	0	0	0		0	0
6-1-2	Potentilla sericea	6	10	3	422	417	91	0.014218	0.0239808	0.032967	0.023722	-3.74135	-0.0887522	0.000562731
6-1-2	Ixeris polycephala				422	417	91	0	0	0	0		0	0
6-1-2	Stellera chamaejasme	6	10	2	422	417	91	0.014218	0.0239808	0.021978	0.0200589	-3.90908	-0.078412	0.000402361
6-1-2	Geranium wilfordii	11	17	6	422	417	91	0.0260664	0.0407674	0.0659341	0.0442559	-3.11777	-0.13798	0.00195859
6-1-2	Gentiana scabra				422	417	91	0	0	0	0		0	0
6-1-2	Gymnaconitum gymnandrum				422	417	91	0	0	0	0		0	0
6-1-2	Gentiana straminea				422	417	91	0	0	0	0		0	0
6-1-2	Iris lactea				422	417	91	0	0	0	0		0	0
6-1-2	Pedicularis sylvatica				422	417	91	0	0	0	0		0	0
6-1-2	Saussurea pulchra	14	18	3	422	417	91	0.0331754	0.0431655	0.032967	0.036436	-3.3122	-0.120683	0.00132758
6-1-2	Allium mongolicum	10	6	4	422	417	91	0.0236967	0.0143885	0.043956	0.0273471	-3.59915	-0.0984261	0.000747862
6-1-2	Elsholtzia densa				422	417	91	0	0	0	0		0	0
6-1-2	Taraxacum mongolicum	26	22	2	422	417	91	0.0616114	0.0527578	0.021978	0.0454491	-3.09116	-0.14049	0.00206562
6-1-2	Lancea tibetica				422	417	91	0	0	0	0		0	0
6-1-2	Anaphalis lactea	10	4	4	422	417	91	0.0236967	0.00959233	0.043956	0.0257484	-3.65938	-0.0942231	0.000662978
6-1-2	Euphorbia esula				422	417	91	0	0	0	0		0	0
6-1-2	Carex myosuroides	60	64	6	422	417	91	0.14218	0.153477	0.0659341	0.12053	-2.11585	-0.255025	0.0145276
6-1-2	Daphne tangutica	5	10	2	422	417	91	0.0118483	0.0239808	0.021978	0.0192691	-3.94925	-0.0760984	0.000371297
6-1-2	Clematis florida				422	417	91	0	0	0	0		0	0
6-1-2	Knorringia sibirica	27	36	6	422	417	91	0.063981	0.0863309	0.0659341	0.072082	-2.62995	-0.189572	0.00519582
6-1-2	Ajania tenuifolia	13	17	3	422	417	91	0.0308057	0.0407674	0.032967	0.0348467	-3.3568	-0.116973	0.00121429
6-1-2	Thermopsis lupinoides				422	417	91	0	0	0	0		0	0
6-1-2	Artemisia capillaris	17	18	5	422	417	91	0.0402844	0.0431655	0.0549451	0.0461316	-3.07626	-0.141913	0.00212813
6-1-2	Kali collinum				422	417	91	0	0	0	0		0	0
6-1-2	Aster tataricus				422	417	91	0	0	0	0		0	0
6-1-2	Bare area		12
6-1-3	Aster altaicus	18	32	5	749	718	174	0.024032	0.0445682	0.0287356	0.0324453	-3.4282	-0.111229	0.0010527	3.4012	30	3.1863	0.936816	0.0467147
6-1-3	Leontopodium nanum	42	3	10	749	718	174	0.0560748	0.00417827	0.0574713	0.0392414	-3.23802	-0.127065	0.00153989
6-1-3	Artemisia argyi	12	23	5	749	718	174	0.0160214	0.0320334	0.0287356	0.0255968	-3.66529	-0.0938197	0.000655197
6-1-3	Artemisia stechmanniana	6	3	3	749	718	174	0.00801068	0.00417827	0.0172414	0.00981011	-4.62434	-0.0453653	9.62383e-05
6-1-3	Gentianopsis barbata				749	718	174	0	0	0	0		0	0
6-1-3	Agropyron cristatum	92	53	10	749	718	174	0.12283	0.0738162	0.0574713	0.084706	-2.46857	-0.209103	0.0071751
6-1-3	Poa pratensis	12	17	8	749	718	174	0.0160214	0.0236769	0.045977	0.0285584	-3.5558	-0.101548	0.000815583
6-1-3	Potentilla supina	42	30	6	749	718	174	0.0560748	0.0417827	0.0344828	0.0441134	-3.12099	-0.137678	0.00194599
6-1-3	Plantago asiatica				749	718	174	0	0	0	0		0	0
6-1-3	Artemisia hedinii	9	15	6	749	718	174	0.012016	0.0208914	0.0344828	0.0224634	-3.79587	-0.085268	0.000504604
6-1-3	Elymus nutans	24	18	3	749	718	174	0.0320427	0.0250696	0.0172414	0.0247846	-3.69753	-0.0916418	0.000614275
6-1-3	Cirsium arvense	5	6	5	749	718	174	0.00667557	0.00835655	0.0287356	0.0145892	-4.22747	-0.0616756	0.000212846
6-1-3	Gentiana dahurica				749	718	174	0	0	0	0		0	0
6-1-3	Calystegia hederacea	3	2	1	749	718	174	0.00400534	0.00278552	0.00574713	0.00417933	-5.4776	-0.0228927	1.74668e-05
6-1-3	Cirsium spicatum				749	718	174	0	0	0	0		0	0
6-1-3	Sanguisorba officinalis				749	718	174	0	0	0	0		0	0
6-1-3	Androsace umbellata	6	8	2	749	718	174	0.00801068	0.0111421	0.0114943	0.0102157	-4.58383	-0.0468269	0.00010436
6-1-3	Cicuta virosa				749	718	174	0	0	0	0		0	0
6-1-3	Stipa breviflora	60	63	8	749	718	174	0.0801068	0.0877437	0.045977	0.0712759	-2.6412	-0.188254	0.00508025
6-1-3	Carduus nutans				749	718	174	0	0	0	0		0	0
6-1-3	Oxytropis kansuensis	12	15	5	749	718	174	0.0160214	0.0208914	0.0287356	0.0218828	-3.82205	-0.0836372	0.000478856
6-1-3	Tibetia himalaica				749	718	174	0	0	0	0		0	0
6-1-3	Festuca elata				749	718	174	0	0	0	0		0	0
6-1-3	Medicago ruthenica	54	42	8	749	718	174	0.0720961	0.0584958	0.045977	0.0588563	-2.83266	-0.16672	0.00346407
6-1-3	Scutellaria baicalensis				749	718	174	0	0	0	0		0	0
6-1-3	Neotrinia splendens				749	718	174	0	0	0	0		0	0
6-1-3	Ligularia sagitta				749	718	174	0	0	0	0		0	0
6-1-3	Nepeta cataria				749	718	174	0	0	0	0		0	0
6-1-3	Dysphania schraderiana				749	718	174	0	0	0	0		0	0
6-1-3	Potentilla sericea	12	18	6	749	718	174	0.0160214	0.0250696	0.0344828	0.0251913	-3.68126	-0.0927355	0.000634599
6-1-3	Ixeris polycephala				749	718	174	0	0	0	0		0	0
6-1-3	Stellera chamaejasme	12	18	5	749	718	174	0.0160214	0.0250696	0.0287356	0.0232755	-3.76035	-0.0875242	0.000541751
6-1-3	Geranium wilfordii	21	32	9	749	718	174	0.0280374	0.0445682	0.0517241	0.0414433	-3.18343	-0.131932	0.00171754
6-1-3	Gentiana scabra	2	4	3	749	718	174	0.00267023	0.00557103	0.0172414	0.00849421	-4.76837	-0.0405035	7.21516e-05
6-1-3	Gymnaconitum gymnandrum				749	718	174	0	0	0	0		0	0
6-1-3	Gentiana straminea				749	718	174	0	0	0	0		0	0
6-1-3	Iris lactea				749	718	174	0	0	0	0		0	0
6-1-3	Pedicularis sylvatica	1	1	1	749	718	174	0.00133511	0.00139276	0.00574713	0.002825	-5.86925	-0.0165806	7.98062e-06
6-1-3	Saussurea pulchra	27	33	6	749	718	174	0.0360481	0.045961	0.0344828	0.0388306	-3.24855	-0.126143	0.00150782
6-1-3	Allium mongolicum	18	12	8	749	718	174	0.024032	0.0167131	0.045977	0.0289074	-3.54366	-0.102438	0.000835637
6-1-3	Elsholtzia densa				749	718	174	0	0	0	0		0	0
6-1-3	Taraxacum mongolicum	48	42	3	749	718	174	0.0640854	0.0584958	0.0172414	0.0466075	-3.06599	-0.142898	0.00217226
6-1-3	Lancea tibetica				749	718	174	0	0	0	0		0	0
6-1-3	Anaphalis lactea	18	8	8	749	718	174	0.024032	0.0111421	0.045977	0.0270504	-3.61005	-0.0976533	0.000731723
6-1-3	Euphorbia esula				749	718	174	0	0	0	0		0	0
6-1-3	Carex myosuroides	71	69	10	749	718	174	0.0947931	0.0961003	0.0574713	0.0827882	-2.49147	-0.206264	0.00685389
6-1-3	Daphne tangutica	9	18	5	749	718	174	0.012016	0.0250696	0.0287356	0.0219404	-3.81942	-0.0837998	0.000481382
6-1-3	Clematis florida				749	718	174	0	0	0	0		0	0
6-1-3	Knorringia sibirica	51	48	8	749	718	174	0.0680908	0.0668524	0.045977	0.0603067	-2.80831	-0.16936	0.0036369
6-1-3	Ajania tenuifolia	24	32	6	749	718	174	0.0320427	0.0445682	0.0344828	0.0370312	-3.29599	-0.122055	0.00137131
6-1-3	Thermopsis lupinoides				749	718	174	0	0	0	0		0	0
6-1-3	Artemisia capillaris	32	35	9	749	718	174	0.0427236	0.0487465	0.0517241	0.0477314	-3.04217	-0.145207	0.00227829
6-1-3	Kali collinum				749	718	174	0	0	0	0		0	0
6-1-3	Aster tataricus	6	9	2	749	718	174	0.00801068	0.0125348	0.0114943	0.0106799	-4.53939	-0.0484803	0.000114061
6-1-3	Bare area		9
6-2-1	Aster altaicus	15	22	4	601	532	129	0.0249584	0.0413534	0.0310078	0.0324398	-3.42837	-0.111216	0.00105234	3.46574	32	3.1763	0.916487	0.048981	28	3.10602	0.933853	0.0507978
6-2-1	Leontopodium nanum	20	7	6	601	532	129	0.0332779	0.0131579	0.0465116	0.0309825	-3.47433	-0.107643	0.000959913
6-2-1	Artemisia argyi	21	17	4	601	532	129	0.0349418	0.0319549	0.0310078	0.0326348	-3.42238	-0.111689	0.00106503
6-2-1	Artemisia stechmanniana	5	3	1	601	532	129	0.00831947	0.0056391	0.00775194	0.00723683	-4.92857	-0.0356673	5.23718e-05
6-2-1	Gentianopsis barbata				601	532	129	0	0	0	0		0	0
6-2-1	Agropyron cristatum	69	42	10	601	532	129	0.114809	0.0789474	0.0775194	0.0904251	-2.40323	-0.217313	0.0081767
6-2-1	Poa pratensis	15	10	4	601	532	129	0.0249584	0.018797	0.0310078	0.024921	-3.69204	-0.0920096	0.000621059
6-2-1	Potentilla supina	25	18	5	601	532	129	0.0415973	0.0338346	0.0387597	0.0380639	-3.26849	-0.124411	0.00144886
6-2-1	Plantago asiatica	2	1	1	601	532	129	0.00332779	0.0018797	0.00775194	0.00431981	-5.44454	-0.0235194	1.86607e-05
6-2-1	Artemisia hedinii	9	16	5	601	532	129	0.014975	0.0300752	0.0387597	0.0279366	-3.57782	-0.0999522	0.000780456
6-2-1	Elymus nutans	22	18	4	601	532	129	0.0366057	0.0338346	0.0310078	0.033816	-3.38682	-0.114529	0.00114352
6-2-1	Cirsium arvense	3	3	2	601	532	129	0.00499168	0.0056391	0.0155039	0.00871155	-4.74311	-0.0413198	7.58911e-05
6-2-1	Gentiana dahurica				601	532	129	0	0	0	0		0	0
6-2-1	Calystegia hederacea	2	3	1	601	532	129	0.00332779	0.0056391	0.00775194	0.00557294	-5.18983	-0.0289226	3.10577e-05
6-2-1	Cirsium spicatum	2	3	2	601	532	129	0.00332779	0.0056391	0.0155039	0.00815692	-4.80889	-0.0392257	6.65353e-05
6-2-1	Sanguisorba officinalis	4	5	2	601	532	129	0.00665557	0.0093985	0.0155039	0.0105193	-4.55454	-0.0479107	0.000110656
6-2-1	Androsace umbellata	6	3	1	601	532	129	0.00998336	0.0056391	0.00775194	0.00779147	-4.85473	-0.0378254	6.07069e-05
6-2-1	Cicuta virosa				601	532	129	0	0	0	0		0	0
6-2-1	Stipa breviflora	45	38	7	601	532	129	0.0748752	0.0714286	0.0542636	0.0668558	-2.70522	-0.180859	0.0044697
6-2-1	Carduus nutans				601	532	129	0	0	0	0		0	0
6-2-1	Oxytropis kansuensis	10	11	4	601	532	129	0.0166389	0.0206767	0.0310078	0.0227745	-3.78212	-0.0861356	0.000518676
6-2-1	Tibetia himalaica				601	532	129	0	0	0	0		0	0
6-2-1	Festuca elata				601	532	129	0	0	0	0		0	0
6-2-1	Medicago ruthenica	35	30	6	601	532	129	0.0582363	0.056391	0.0465116	0.053713	-2.9241	-0.157062	0.00288508
6-2-1	Scutellaria baicalensis				601	532	129	0	0	0	0		0	0
6-2-1	Neotrinia splendens				601	532	129	0	0	0	0		0	0
6-2-1	Ligularia sagitta				601	532	129	0	0	0	0		0	0
6-2-1	Nepeta cataria				601	532	129	0	0	0	0		0	0
6-2-1	Dysphania schraderiana				601	532	129	0	0	0	0		0	0
6-2-1	Potentilla sericea	10	8	5	601	532	129	0.0166389	0.0150376	0.0387597	0.0234787	-3.75166	-0.0880842	0.000551251
6-2-1	Ixeris polycephala				601	532	129	0	0	0	0		0	0
6-2-1	Stellera chamaejasme	12	15	4	601	532	129	0.0199667	0.0281955	0.0310078	0.02639	-3.63477	-0.0959216	0.000696431
6-2-1	Geranium wilfordii	16	22	5	601	532	129	0.0266223	0.0413534	0.0387597	0.0355785	-3.33601	-0.11869	0.00126583
6-2-1	Gentiana scabra				601	532	129	0	0	0	0		0	0
6-2-1	Gymnaconitum gymnandrum				601	532	129	0	0	0	0		0	0
6-2-1	Gentiana straminea				601	532	129	0	0	0	0		0	0
6-2-1	Iris lactea				601	532	129	0	0	0	0		0	0
6-2-1	Pedicularis sylvatica	1	2	1	601	532	129	0.00166389	0.0037594	0.00775194	0.00439174	-5.42803	-0.0238385	1.92874e-05
6-2-1	Saussurea pulchra	22	20	5	601	532	129	0.0366057	0.037594	0.0387597	0.0376531	-3.27934	-0.123477	0.00141776
6-2-1	Allium mongolicum	15	10	4	601	532	129	0.0249584	0.018797	0.0310078	0.024921	-3.69204	-0.0920096	0.000621059
6-2-1	Elsholtzia densa				601	532	129	0	0	0	0		0	0
6-2-1	Taraxacum mongolicum	30	25	3	601	532	129	0.0499168	0.0469925	0.0232558	0.040055	-3.2175	-0.128877	0.00160441
6-2-1	Lancea tibetica				601	532	129	0	0	0	0		0	0
6-2-1	Anaphalis lactea	10	8	4	601	532	129	0.0166389	0.0150376	0.0310078	0.0208948	-3.86826	-0.0808263	0.000436591
6-2-1	Euphorbia esula				601	532	129	0	0	0	0		0	0
6-2-1	Carex myosuroides	77	69	8	601	532	129	0.12812	0.129699	0.0620155	0.106612	-2.23856	-0.238657	0.011366
6-2-1	Daphne tangutica	5	11	2	601	532	129	0.00831947	0.0206767	0.0155039	0.0148333	-4.21088	-0.0624614	0.000220028
6-2-1	Clematis florida				601	532	129	0	0	0	0		0	0
6-2-1	Knorringia sibirica	42	35	8	601	532	129	0.0698835	0.0657895	0.0620155	0.0658962	-2.71967	-0.179216	0.00434231
6-2-1	Ajania tenuifolia	21	18	5	601	532	129	0.0349418	0.0338346	0.0387597	0.0358453	-3.32854	-0.119313	0.00128489
6-2-1	Thermopsis lupinoides				601	532	129	0	0	0	0		0	0
6-2-1	Artemisia capillaris	25	20	5	601	532	129	0.0415973	0.037594	0.0387597	0.039317	-3.2361	-0.127234	0.00154583
6-2-1	Kali collinum				601	532	129	0	0	0	0		0	0
6-2-1	Aster tataricus	5	5	1	601	532	129	0.00831947	0.0093985	0.00775194	0.00848997	-4.76887	-0.0404876	7.20795e-05
6-2-1	Bare area		14
6-2-2	Aster altaicus	12	18	3	470	402	98	0.0255319	0.0447761	0.0306122	0.0336401	-3.39204	-0.114108	0.00113166	3.2581	26	3.03911	0.932788	0.0547706
6-2-2	Leontopodium nanum	16	6	5	470	402	98	0.0340426	0.0149254	0.0510204	0.0333294	-3.40131	-0.113364	0.00111085
6-2-2	Artemisia argyi	17	14	3	470	402	98	0.0361702	0.0348259	0.0306122	0.0338694	-3.38524	-0.114656	0.00114714
6-2-2	Artemisia stechmanniana	4	2	1	470	402	98	0.00851064	0.00497512	0.0102041	0.00789661	-4.84132	-0.03823	6.23565e-05
6-2-2	Gentianopsis barbata				470	402	98	0	0	0	0		0	0
6-2-2	Agropyron cristatum	55	34	10	470	402	98	0.117021	0.0845771	0.102041	0.101213	-2.29053	-0.231831	0.0102441
6-2-2	Poa pratensis	12	8	3	470	402	98	0.0255319	0.0199005	0.0306122	0.0253482	-3.67505	-0.0931559	0.000642532
6-2-2	Potentilla supina	20	14	4	470	402	98	0.0425532	0.0348259	0.0408163	0.0393985	-3.23403	-0.127416	0.00155224
6-2-2	Plantago asiatica	2	1	1	470	402	98	0.00425532	0.00248756	0.0102041	0.00564899	-5.17628	-0.0292407	3.19111e-05
6-2-2	Artemisia hedinii	7	13	4	470	402	98	0.0148936	0.0323383	0.0408163	0.0293494	-3.52848	-0.103559	0.000861388
6-2-2	Elymus nutans	18	14	3	470	402	98	0.0382979	0.0348259	0.0306122	0.0345787	-3.36452	-0.116341	0.00119568
6-2-2	Cirsium arvense				470	402	98	0	0	0	0		0	0
6-2-2	Gentiana dahurica				470	402	98	0	0	0	0		0	0
6-2-2	Calystegia hederacea				470	402	98	0	0	0	0		0	0
6-2-2	Cirsium spicatum				470	402	98	0	0	0	0		0	0
6-2-2	Sanguisorba officinalis				470	402	98	0	0	0	0		0	0
6-2-2	Androsace umbellata	5	2	1	470	402	98	0.0106383	0.00497512	0.0102041	0.00860583	-4.75531	-0.0409235	7.40604e-05
6-2-2	Cicuta virosa				470	402	98	0	0	0	0		0	0
6-2-2	Stipa breviflora	36	30	6	470	402	98	0.0765957	0.0746269	0.0612245	0.0708157	-2.64767	-0.187497	0.00501486
6-2-2	Carduus nutans				470	402	98	0	0	0	0		0	0
6-2-2	Oxytropis kansuensis	8	9	3	470	402	98	0.0170213	0.0223881	0.0306122	0.0233405	-3.75756	-0.0877035	0.00054478
6-2-2	Tibetia himalaica				470	402	98	0	0	0	0		0	0
6-2-2	Festuca elata				470	402	98	0	0	0	0		0	0
6-2-2	Medicago ruthenica	28	24	5	470	402	98	0.0595745	0.0597015	0.0510204	0.0567655	-2.86883	-0.16285	0.00322232
6-2-2	Scutellaria baicalensis				470	402	98	0	0	0	0		0	0
6-2-2	Neotrinia splendens				470	402	98	0	0	0	0		0	0
6-2-2	Ligularia sagitta				470	402	98	0	0	0	0		0	0
6-2-2	Nepeta cataria				470	402	98	0	0	0	0		0	0
6-2-2	Dysphania schraderiana				470	402	98	0	0	0	0		0	0
6-2-2	Potentilla sericea	8	6	4	470	402	98	0.0170213	0.0149254	0.0408163	0.0242543	-3.71916	-0.0902057	0.000588272
6-2-2	Ixeris polycephala				470	402	98	0	0	0	0		0	0
6-2-2	Stellera chamaejasme	10	12	3	470	402	98	0.0212766	0.0298507	0.0306122	0.0272465	-3.60283	-0.0981646	0.000742373
6-2-2	Geranium wilfordii	13	18	4	470	402	98	0.0276596	0.0447761	0.0408163	0.0377507	-3.27675	-0.1237	0.00142511
6-2-2	Gentiana scabra				470	402	98	0	0	0	0		0	0
6-2-2	Gymnaconitum gymnandrum				470	402	98	0	0	0	0		0	0
6-2-2	Gentiana straminea				470	402	98	0	0	0	0		0	0
6-2-2	Iris lactea				470	402	98	0	0	0	0		0	0
6-2-2	Pedicularis sylvatica				470	402	98	0	0	0	0		0	0
6-2-2	Saussurea pulchra	18	16	4	470	402	98	0.0382979	0.039801	0.0408163	0.0396384	-3.22796	-0.127951	0.0015712
6-2-2	Allium mongolicum	12	8	3	470	402	98	0.0255319	0.0199005	0.0306122	0.0253482	-3.67505	-0.0931559	0.000642532
6-2-2	Elsholtzia densa				470	402	98	0	0	0	0		0	0
6-2-2	Taraxacum mongolicum	24	20	3	470	402	98	0.0510638	0.0497512	0.0306122	0.0438091	-3.12791	-0.137031	0.00191924
6-2-2	Lancea tibetica				470	402	98	0	0	0	0		0	0
6-2-2	Anaphalis lactea	8	6	3	470	402	98	0.0170213	0.0149254	0.0306122	0.020853	-3.87026	-0.0807064	0.000434846
6-2-2	Euphorbia esula				470	402	98	0	0	0	0		0	0
6-2-2	Carex myosuroides	62	55	7	470	402	98	0.131915	0.136816	0.0714286	0.113386	-2.17695	-0.246837	0.0128565
6-2-2	Daphne tangutica				470	402	98	0	0	0	0		0	0
6-2-2	Clematis florida				470	402	98	0	0	0	0		0	0
6-2-2	Knorringia sibirica	34	28	6	470	402	98	0.0723404	0.0696517	0.0612245	0.0677389	-2.69209	-0.18236	0.00458856
6-2-2	Ajania tenuifolia	17	14	4	470	402	98	0.0361702	0.0348259	0.0408163	0.0372708	-3.28955	-0.122604	0.00138911
6-2-2	Thermopsis lupinoides				470	402	98	0	0	0	0		0	0
6-2-2	Artemisia capillaris	20	16	4	470	402	98	0.0425532	0.039801	0.0408163	0.0410568	-3.1928	-0.131086	0.00168566
6-2-2	Kali collinum				470	402	98	0	0	0	0		0	0
6-2-2	Aster tataricus	4	4	1	470	402	98	0.00851064	0.00995025	0.0102041	0.00955499	-4.65069	-0.0444373	9.12978e-05
6-2-2	Bare area		10
6-2-3	Aster altaicus	23	33	6	857	739	174	0.0268378	0.0446549	0.0344828	0.0353252	-3.34316	-0.118098	0.00124787	3.2581	26	3.10263	0.952282	0.0486419
6-2-3	Leontopodium nanum	30	11	9	857	739	174	0.0350058	0.014885	0.0517241	0.0338717	-3.38518	-0.114662	0.00114729
6-2-3	Artemisia argyi	32	26	6	857	739	174	0.0373396	0.0351827	0.0344828	0.0356683	-3.33349	-0.1189	0.00127223
6-2-3	Artemisia stechmanniana	8	5	2	857	739	174	0.00933489	0.0067659	0.0114943	0.00919835	-4.68873	-0.0431286	8.46096e-05
6-2-3	Gentianopsis barbata				857	739	174	0	0	0	0		0	0
6-2-3	Agropyron cristatum	102	63	10	857	739	174	0.11902	0.0852503	0.0574713	0.0872471	-2.43901	-0.212797	0.00761206
6-2-3	Poa pratensis	23	15	6	857	739	174	0.0268378	0.0202977	0.0344828	0.0272061	-3.60431	-0.0980593	0.000740171
6-2-3	Potentilla supina	38	27	8	857	739	174	0.0443407	0.0365359	0.045977	0.0422845	-3.16333	-0.13376	0.00178798
6-2-3	Plantago asiatica				857	739	174	0	0	0	0		0	0
6-2-3	Artemisia hedinii	14	22	8	857	739	174	0.0163361	0.02977	0.045977	0.0306943	-3.48368	-0.106929	0.000942143
6-2-3	Elymus nutans	33	27	6	857	739	174	0.0385064	0.0365359	0.0344828	0.0365083	-3.31021	-0.12085	0.00133286
6-2-3	Cirsium arvense	5	5	3	857	739	174	0.00583431	0.0067659	0.0172414	0.00994719	-4.61046	-0.0458612	9.89467e-05
6-2-3	Gentiana dahurica				857	739	174	0	0	0	0		0	0
6-2-3	Calystegia hederacea				857	739	174	0	0	0	0		0	0
6-2-3	Cirsium spicatum				857	739	174	0	0	0	0		0	0
6-2-3	Sanguisorba officinalis				857	739	174	0	0	0	0		0	0
6-2-3	Androsace umbellata	9	5	2	857	739	174	0.0105018	0.0067659	0.0114943	0.0095873	-4.64732	-0.0445552	9.19163e-05
6-2-3	Cicuta virosa				857	739	174	0	0	0	0		0	0
6-2-3	Stipa breviflora	68	57	8	857	739	174	0.0793466	0.0771313	0.045977	0.0674849	-2.69585	-0.181929	0.00455422
6-2-3	Carduus nutans				857	739	174	0	0	0	0		0	0
6-2-3	Oxytropis kansuensis	15	17	6	857	739	174	0.0175029	0.0230041	0.0344828	0.0249966	-3.68902	-0.0922128	0.000624829
6-2-3	Tibetia himalaica				857	739	174	0	0	0	0		0	0
6-2-3	Festuca elata				857	739	174	0	0	0	0		0	0
6-2-3	Medicago ruthenica	53	45	9	857	739	174	0.0618436	0.0608931	0.0517241	0.0581536	-2.84467	-0.165428	0.00338184
6-2-3	Scutellaria baicalensis				857	739	174	0	0	0	0		0	0
6-2-3	Neotrinia splendens				857	739	174	0	0	0	0		0	0
6-2-3	Ligularia sagitta				857	739	174	0	0	0	0		0	0
6-2-3	Nepeta cataria				857	739	174	0	0	0	0		0	0
6-2-3	Dysphania schraderiana				857	739	174	0	0	0	0		0	0
6-2-3	Potentilla sericea	15	12	8	857	739	174	0.0175029	0.0162382	0.045977	0.0265727	-3.62787	-0.0964023	0.000706108
6-2-3	Ixeris polycephala				857	739	174	0	0	0	0		0	0
6-2-3	Stellera chamaejasme	18	23	6	857	739	174	0.0210035	0.0311231	0.0344828	0.0288698	-3.54496	-0.102342	0.000833465
6-2-3	Geranium wilfordii	24	33	8	857	739	174	0.0280047	0.0446549	0.045977	0.0395455	-3.2303	-0.127744	0.00156385
6-2-3	Gentiana scabra				857	739	174	0	0	0	0		0	0
6-2-3	Gymnaconitum gymnandrum				857	739	174	0	0	0	0		0	0
6-2-3	Gentiana straminea				857	739	174	0	0	0	0		0	0
6-2-3	Iris lactea				857	739	174	0	0	0	0		0	0
6-2-3	Pedicularis sylvatica				857	739	174	0	0	0	0		0	0
6-2-3	Saussurea pulchra	33	30	8	857	739	174	0.0385064	0.0405954	0.045977	0.0416929	-3.17742	-0.132476	0.0017383
6-2-3	Allium mongolicum	23	15	6	857	739	174	0.0268378	0.0202977	0.0344828	0.0272061	-3.60431	-0.0980593	0.000740171
6-2-3	Elsholtzia densa				857	739	174	0	0	0	0		0	0
6-2-3	Taraxacum mongolicum	45	38	5	857	739	174	0.0525088	0.0514208	0.0287356	0.0442217	-3.11854	-0.137907	0.00195556
6-2-3	Lancea tibetica				857	739	174	0	0	0	0		0	0
6-2-3	Anaphalis lactea	15	12	6	857	739	174	0.0175029	0.0162382	0.0344828	0.0227413	-3.78357	-0.0860433	0.000517166
6-2-3	Euphorbia esula				857	739	174	0	0	0	0		0	0
6-2-3	Carex myosuroides	90	73	10	857	739	174	0.105018	0.0987821	0.0574713	0.0870903	-2.44081	-0.212571	0.00758472
6-2-3	Daphne tangutica	8	17	3	857	739	174	0.00933489	0.0230041	0.0172414	0.0165268	-4.10277	-0.0678056	0.000273134
6-2-3	Clematis florida				857	739	174	0	0	0	0		0	0
6-2-3	Knorringia sibirica	63	53	9	857	739	174	0.0735123	0.0717185	0.0517241	0.0656516	-2.72339	-0.178795	0.00431014
6-2-3	Ajania tenuifolia	32	27	8	857	739	174	0.0373396	0.0365359	0.045977	0.0399508	-3.22011	-0.128646	0.00159607
6-2-3	Thermopsis lupinoides				857	739	174	0	0	0	0		0	0
6-2-3	Artemisia capillaris	38	30	8	857	739	174	0.0443407	0.0405954	0.045977	0.0436377	-3.13183	-0.136666	0.00190425
6-2-3	Kali collinum				857	739	174	0	0	0	0		0	0
6-2-3	Aster tataricus				857	739	174	0	0	0	0		0	0
6-2-3	Bare area		18
6-3-1	Aster altaicus	25	27	6	560	470	134	0.0446429	0.0574468	0.0447761	0.0489553	-3.01685	-0.147691	0.00239662	3.2581	26	3.06052	0.939358	0.0515825	28	3.1184	0.936403	0.0492695
6-3-1	Leontopodium nanum	18	6	5	560	470	134	0.0321429	0.012766	0.0373134	0.0274074	-3.59694	-0.0985829	0.000751166
6-3-1	Artemisia argyi	22	15	6	560	470	134	0.0392857	0.0319149	0.0447761	0.0386589	-3.25298	-0.125757	0.00149451
6-3-1	Artemisia stechmanniana	7	4	2	560	470	134	0.0125	0.00851064	0.0149254	0.0119787	-4.42463	-0.0530012	0.000143489
6-3-1	Gentianopsis barbata				560	470	134	0	0	0	0		0	0
6-3-1	Agropyron cristatum	60	45	10	560	470	134	0.107143	0.0957447	0.0746269	0.0925048	-2.38049	-0.220207	0.00855714
6-3-1	Poa pratensis	10	12	5	560	470	134	0.0178571	0.0255319	0.0373134	0.0269008	-3.6156	-0.0972626	0.000723655
6-3-1	Potentilla supina	20	13	4	560	470	134	0.0357143	0.0276596	0.0298507	0.0310749	-3.47136	-0.107872	0.000965647
6-3-1	Plantago asiatica	1	1	1	560	470	134	0.00178571	0.00212766	0.00746269	0.00379202	-5.57486	-0.02114	1.43794e-05
6-3-1	Artemisia hedinii	10	12	6	560	470	134	0.0178571	0.0255319	0.0447761	0.0293884	-3.52716	-0.103657	0.000863678
6-3-1	Elymus nutans	18	20	6	560	470	134	0.0321429	0.0425532	0.0447761	0.0398241	-3.22328	-0.128364	0.00158596
6-3-1	Cirsium arvense	2	2	2	560	470	134	0.00357143	0.00425532	0.0149254	0.00758404	-4.88171	-0.0370231	5.75177e-05
6-3-1	Gentiana dahurica				560	470	134	0	0	0	0		0	0
6-3-1	Calystegia hederacea				560	470	134	0	0	0	0		0	0
6-3-1	Cirsium spicatum				560	470	134	0	0	0	0		0	0
6-3-1	Sanguisorba officinalis				560	470	134	0	0	0	0		0	0
6-3-1	Androsace umbellata				560	470	134	0	0	0	0		0	0
6-3-1	Cicuta virosa				560	470	134	0	0	0	0		0	0
6-3-1	Stipa breviflora	51	42	8	560	470	134	0.0910714	0.0893617	0.0597015	0.0800449	-2.52517	-0.202127	0.00640718
6-3-1	Carduus nutans				560	470	134	0	0	0	0		0	0
6-3-1	Oxytropis kansuensis	8	10	3	560	470	134	0.0142857	0.0212766	0.0223881	0.0193168	-3.94678	-0.0762391	0.000373138
6-3-1	Tibetia himalaica				560	470	134	0	0	0	0		0	0
6-3-1	Festuca elata				560	470	134	0	0	0	0		0	0
6-3-1	Medicago ruthenica	32	25	7	560	470	134	0.0571429	0.0531915	0.0522388	0.0541911	-2.91524	-0.15798	0.00293667
6-3-1	Scutellaria baicalensis				560	470	134	0	0	0	0		0	0
6-3-1	Neotrinia splendens				560	470	134	0	0	0	0		0	0
6-3-1	Ligularia sagitta				560	470	134	0	0	0	0		0	0
6-3-1	Nepeta cataria				560	470	134	0	0	0	0		0	0
6-3-1	Dysphania schraderiana				560	470	134	0	0	0	0		0	0
6-3-1	Potentilla sericea	12	10	5	560	470	134	0.0214286	0.0212766	0.0373134	0.0266729	-3.62411	-0.0966654	0.000711442
6-3-1	Ixeris polycephala				560	470	134	0	0	0	0		0	0
6-3-1	Stellera chamaejasme	14	10	5	560	470	134	0.025	0.0212766	0.0373134	0.0278633	-3.58044	-0.0997631	0.000776366
6-3-1	Geranium wilfordii	18	20	4	560	470	134	0.0321429	0.0425532	0.0298507	0.0348489	-3.35673	-0.116979	0.00121445
6-3-1	Gentiana scabra				560	470	134	0	0	0	0		0	0
6-3-1	Gymnaconitum gymnandrum				560	470	134	0	0	0	0		0	0
6-3-1	Gentiana straminea				560	470	134	0	0	0	0		0	0
6-3-1	Iris lactea				560	470	134	0	0	0	0		0	0
6-3-1	Pedicularis sylvatica				560	470	134	0	0	0	0		0	0
6-3-1	Saussurea pulchra	25	15	4	560	470	134	0.0446429	0.0319149	0.0298507	0.0354695	-3.33908	-0.118436	0.00125809
6-3-1	Allium mongolicum	10	12	6	560	470	134	0.0178571	0.0255319	0.0447761	0.0293884	-3.52716	-0.103657	0.000863678
6-3-1	Elsholtzia densa				560	470	134	0	0	0	0		0	0
6-3-1	Taraxacum mongolicum	25	18	4	560	470	134	0.0446429	0.0382979	0.0298507	0.0375972	-3.28083	-0.12335	0.00141355
6-3-1	Lancea tibetica				560	470	134	0	0	0	0		0	0
6-3-1	Anaphalis lactea	14	7	6	560	470	134	0.025	0.0148936	0.0447761	0.0282232	-3.56761	-0.10069	0.000796552
6-3-1	Euphorbia esula				560	470	134	0	0	0	0		0	0
6-3-1	Carex myosuroides	60	55	9	560	470	134	0.107143	0.117021	0.0671642	0.0971094	-2.33192	-0.226451	0.00943024
6-3-1	Daphne tangutica	8	10	1	560	470	134	0.0142857	0.0212766	0.00746269	0.0143417	-4.24459	-0.0608744	0.000205683
6-3-1	Clematis florida				560	470	134	0	0	0	0		0	0
6-3-1	Knorringia sibirica	42	35	7	560	470	134	0.075	0.0744681	0.0522388	0.0672356	-2.69955	-0.181506	0.00452063
6-3-1	Ajania tenuifolia	26	14	6	560	470	134	0.0464286	0.0297872	0.0447761	0.0403306	-3.21064	-0.129487	0.00162656
6-3-1	Thermopsis lupinoides				560	470	134	0	0	0	0		0	0
6-3-1	Artemisia capillaris	22	15	6	560	470	134	0.0392857	0.0319149	0.0447761	0.0386589	-3.25298	-0.125757	0.00149451
6-3-1	Kali collinum				560	470	134	0	0	0	0		0	0
6-3-1	Aster tataricus				560	470	134	0	0	0	0		0	0
6-3-1	Bare area		15
6-3-2	Aster altaicus	20	22	5	458	390	115	0.0436681	0.0564103	0.0434783	0.0478522	-3.03964	-0.145453	0.00228983	3.4012	30	3.15228	0.926815	0.0481709
6-3-2	Leontopodium nanum	14	5	4	458	390	115	0.0305677	0.0128205	0.0347826	0.0260569	-3.64747	-0.0950419	0.000678964
6-3-2	Artemisia argyi	18	12	5	458	390	115	0.0393013	0.0307692	0.0434783	0.0378496	-3.27413	-0.123925	0.00143259
6-3-2	Artemisia stechmanniana	6	3	2	458	390	115	0.0131004	0.00769231	0.0173913	0.012728	-4.36395	-0.0555444	0.000162002
6-3-2	Gentianopsis barbata				458	390	115	0	0	0	0		0	0
6-3-2	Agropyron cristatum	48	36	8	458	390	115	0.104803	0.0923077	0.0695652	0.0888921	-2.42033	-0.215148	0.00790181
6-3-2	Poa pratensis	8	10	4	458	390	115	0.0174672	0.025641	0.0347826	0.0259636	-3.65106	-0.0947947	0.00067411
6-3-2	Potentilla supina	16	10	3	458	390	115	0.0349345	0.025641	0.026087	0.0288875	-3.54435	-0.102387	0.000834487
6-3-2	Plantago asiatica	1	1	1	458	390	115	0.00218341	0.0025641	0.00869565	0.00448105	-5.4079	-0.0242331	2.00798e-05
6-3-2	Artemisia hedinii	8	10	5	458	390	115	0.0174672	0.025641	0.0434783	0.0288622	-3.54522	-0.102323	0.000833025
6-3-2	Elymus nutans	14	16	5	458	390	115	0.0305677	0.0410256	0.0434783	0.0383572	-3.26081	-0.125076	0.00147127
6-3-2	Cirsium arvense	2	2	2	458	390	115	0.00436681	0.00512821	0.0173913	0.00896211	-4.71475	-0.0422541	8.03194e-05
6-3-2	Gentiana dahurica				458	390	115	0	0	0	0		0	0
6-3-2	Calystegia hederacea	3	4	2	458	390	115	0.00655022	0.0102564	0.0173913	0.0113993	-4.4742	-0.0510028	0.000129944
6-3-2	Cirsium spicatum				458	390	115	0	0	0	0		0	0
6-3-2	Sanguisorba officinalis				458	390	115	0	0	0	0		0	0
6-3-2	Androsace umbellata	2	1	1	458	390	115	0.00436681	0.0025641	0.00869565	0.00520886	-5.2574	-0.027385	2.71322e-05
6-3-2	Cicuta virosa				458	390	115	0	0	0	0		0	0
6-3-2	Stipa breviflora	41	34	6	458	390	115	0.0895197	0.0871795	0.0521739	0.076291	-2.5732	-0.196312	0.00582032
6-3-2	Carduus nutans				458	390	115	0	0	0	0		0	0
6-3-2	Oxytropis kansuensis	6	8	2	458	390	115	0.0131004	0.0205128	0.0173913	0.0170015	-4.07445	-0.0692719	0.000289052
6-3-2	Tibetia himalaica				458	390	115	0	0	0	0		0	0
6-3-2	Festuca elata				458	390	115	0	0	0	0		0	0
6-3-2	Medicago ruthenica	26	20	6	458	390	115	0.0567686	0.0512821	0.0521739	0.0534082	-2.92979	-0.156475	0.00285243
6-3-2	Scutellaria baicalensis				458	390	115	0	0	0	0		0	0
6-3-2	Neotrinia splendens				458	390	115	0	0	0	0		0	0
6-3-2	Ligularia sagitta				458	390	115	0	0	0	0		0	0
6-3-2	Nepeta cataria				458	390	115	0	0	0	0		0	0
6-3-2	Dysphania schraderiana				458	390	115	0	0	0	0		0	0
6-3-2	Potentilla sericea	10	8	4	458	390	115	0.0218341	0.0205128	0.0347826	0.0257098	-3.66088	-0.0941207	0.000660995
6-3-2	Ixeris polycephala				458	390	115	0	0	0	0		0	0
6-3-2	Stellera chamaejasme	11	8	4	458	390	115	0.0240175	0.0205128	0.0347826	0.0264376	-3.63297	-0.096047	0.000698948
6-3-2	Geranium wilfordii	14	16	3	458	390	115	0.0305677	0.0410256	0.026087	0.0325601	-3.42467	-0.111508	0.00106016
6-3-2	Gentiana scabra				458	390	115	0	0	0	0		0	0
6-3-2	Gymnaconitum gymnandrum				458	390	115	0	0	0	0		0	0
6-3-2	Gentiana straminea				458	390	115	0	0	0	0		0	0
6-3-2	Iris lactea				458	390	115	0	0	0	0		0	0
6-3-2	Pedicularis sylvatica	1	4	2	458	390	115	0.00218341	0.0102564	0.0173913	0.00994371	-4.61082	-0.0458486	9.88773e-05
6-3-2	Saussurea pulchra	20	12	3	458	390	115	0.0436681	0.0307692	0.026087	0.0335081	-3.39597	-0.113792	0.00112279
6-3-2	Allium mongolicum	8	10	5	458	390	115	0.0174672	0.025641	0.0434783	0.0288622	-3.54522	-0.102323	0.000833025
6-3-2	Elsholtzia densa				458	390	115	0	0	0	0		0	0
6-3-2	Taraxacum mongolicum	20	14	3	458	390	115	0.0436681	0.0358974	0.026087	0.0352175	-3.34621	-0.117845	0.00124027
6-3-2	Lancea tibetica				458	390	115	0	0	0	0		0	0
6-3-2	Anaphalis lactea	11	6	5	458	390	115	0.0240175	0.0153846	0.0434783	0.0276268	-3.58897	-0.0991517	0.000763239
6-3-2	Euphorbia esula				458	390	115	0	0	0	0		0	0
6-3-2	Carex myosuroides	48	44	7	458	390	115	0.104803	0.112821	0.0608696	0.0928312	-2.37697	-0.220657	0.00861763
6-3-2	Daphne tangutica	6	8	1	458	390	115	0.0131004	0.0205128	0.00869565	0.014103	-4.26137	-0.060098	0.000198894
6-3-2	Clematis florida				458	390	115	0	0	0	0		0	0
6-3-2	Knorringia sibirica	34	28	6	458	390	115	0.0742358	0.0717949	0.0521739	0.0660682	-2.71707	-0.179512	0.00436501
6-3-2	Ajania tenuifolia	21	11	5	458	390	115	0.0458515	0.0282051	0.0434783	0.0391783	-3.23963	-0.126923	0.00153494
6-3-2	Thermopsis lupinoides				458	390	115	0	0	0	0		0	0
6-3-2	Artemisia capillaris	18	12	5	458	390	115	0.0393013	0.0307692	0.0434783	0.0378496	-3.27413	-0.123925	0.00143259
6-3-2	Kali collinum				458	390	115	0	0	0	0		0	0
6-3-2	Aster tataricus	3	2	1	458	390	115	0.00655022	0.00512821	0.00869565	0.00679136	-4.9921	-0.0339032	4.61226e-05
6-3-2	Bare area		13
6-3-3	Aster altaicus	38	41	9	848	686	194	0.0448113	0.0597668	0.0463918	0.0503233	-2.98929	-0.150431	0.00253243	3.3322	28	3.14239	0.943037	0.0480551
6-3-3	Leontopodium nanum	27	9	8	848	686	194	0.0318396	0.0131195	0.0412371	0.0287321	-3.54974	-0.101991	0.000825533
6-3-3	Artemisia argyi	33	23	9	848	686	194	0.0389151	0.0335277	0.0463918	0.0396115	-3.22864	-0.127891	0.00156907
6-3-3	Artemisia stechmanniana	11	6	3	848	686	194	0.0129717	0.00874636	0.0154639	0.012394	-4.39054	-0.0544164	0.000153611
6-3-3	Gentianopsis barbata				848	686	194	0	0	0	0		0	0
6-3-3	Agropyron cristatum	90	68	10	848	686	194	0.106132	0.0991254	0.0515464	0.0856013	-2.45806	-0.210413	0.00732758
6-3-3	Poa pratensis	15	18	8	848	686	194	0.0176887	0.0262391	0.0412371	0.0283883	-3.56178	-0.101113	0.000805895
6-3-3	Potentilla supina	30	20	6	848	686	194	0.0353774	0.0291545	0.0309278	0.0318199	-3.44766	-0.109704	0.00101251
6-3-3	Plantago asiatica	2	2	2	848	686	194	0.00235849	0.00291545	0.0103093	0.00519441	-5.26017	-0.0273235	2.69819e-05
6-3-3	Artemisia hedinii	15	18	9	848	686	194	0.0176887	0.0262391	0.0463918	0.0301065	-3.50301	-0.105463	0.000906401
6-3-3	Elymus nutans	27	30	9	848	686	194	0.0318396	0.0437318	0.0463918	0.0406544	-3.20265	-0.130202	0.00165278
6-3-3	Cirsium arvense	3	3	3	848	686	194	0.00353774	0.00437318	0.0154639	0.00779161	-4.85471	-0.037826	6.07092e-05
6-3-3	Gentiana dahurica				848	686	194	0	0	0	0		0	0
6-3-3	Calystegia hederacea				848	686	194	0	0	0	0		0	0
6-3-3	Cirsium spicatum				848	686	194	0	0	0	0		0	0
6-3-3	Sanguisorba officinalis				848	686	194	0	0	0	0		0	0
6-3-3	Androsace umbellata	3	2	2	848	686	194	0.00353774	0.00291545	0.0103093	0.00558749	-5.18723	-0.0289836	3.122e-05
6-3-3	Cicuta virosa				848	686	194	0	0	0	0		0	0
6-3-3	Stipa breviflora	77	63	8	848	686	194	0.0908019	0.0918367	0.0412371	0.0746252	-2.59528	-0.193673	0.00556893
6-3-3	Carduus nutans				848	686	194	0	0	0	0		0	0
6-3-3	Oxytropis kansuensis	12	15	5	848	686	194	0.0141509	0.0218659	0.0257732	0.0205967	-3.88263	-0.0799692	0.000424223
6-3-3	Tibetia himalaica				848	686	194	0	0	0	0		0	0
6-3-3	Festuca elata				848	686	194	0	0	0	0		0	0
6-3-3	Medicago ruthenica	48	38	10	848	686	194	0.0566038	0.0553936	0.0515464	0.0545146	-2.90929	-0.158599	0.00297184
6-3-3	Scutellaria baicalensis				848	686	194	0	0	0	0		0	0
6-3-3	Neotrinia splendens				848	686	194	0	0	0	0		0	0
6-3-3	Ligularia sagitta				848	686	194	0	0	0	0		0	0
6-3-3	Nepeta cataria				848	686	194	0	0	0	0		0	0
6-3-3	Dysphania schraderiana				848	686	194	0	0	0	0		0	0
6-3-3	Potentilla sericea	18	15	8	848	686	194	0.0212264	0.0218659	0.0412371	0.0281098	-3.57164	-0.100398	0.000790161
6-3-3	Ixeris polycephala				848	686	194	0	0	0	0		0	0
6-3-3	Stellera chamaejasme	21	15	8	848	686	194	0.0247642	0.0218659	0.0412371	0.0292891	-3.53054	-0.103406	0.000857849
6-3-3	Geranium wilfordii	27	30	6	848	686	194	0.0318396	0.0437318	0.0309278	0.0354997	-3.33823	-0.118506	0.00126023
6-3-3	Gentiana scabra				848	686	194	0	0	0	0		0	0
6-3-3	Gymnaconitum gymnandrum				848	686	194	0	0	0	0		0	0
6-3-3	Gentiana straminea				848	686	194	0	0	0	0		0	0
6-3-3	Iris lactea				848	686	194	0	0	0	0		0	0
6-3-3	Pedicularis sylvatica				848	686	194	0	0	0	0		0	0
6-3-3	Saussurea pulchra	38	23	6	848	686	194	0.0448113	0.0335277	0.0309278	0.0364223	-3.31257	-0.120652	0.00132658
6-3-3	Allium mongolicum	15	18	9	848	686	194	0.0176887	0.0262391	0.0463918	0.0301065	-3.50301	-0.105463	0.000906401
6-3-3	Elsholtzia densa				848	686	194	0	0	0	0		0	0
6-3-3	Taraxacum mongolicum	38	27	6	848	686	194	0.0448113	0.0393586	0.0309278	0.0383659	-3.26059	-0.125095	0.00147194
6-3-3	Lancea tibetica				848	686	194	0	0	0	0		0	0
6-3-3	Anaphalis lactea	21	11	9	848	686	194	0.0247642	0.016035	0.0463918	0.0290636	-3.53827	-0.102835	0.000844695
6-3-3	Euphorbia esula				848	686	194	0	0	0	0		0	0
6-3-3	Carex myosuroides	86	65	10	848	686	194	0.101415	0.0947522	0.0515464	0.0825712	-2.49409	-0.20594	0.00681801
6-3-3	Daphne tangutica	12	15	2	848	686	194	0.0141509	0.0218659	0.0103093	0.015442	-4.17066	-0.0644035	0.000238457
6-3-3	Clematis florida				848	686	194	0	0	0	0		0	0
6-3-3	Knorringia sibirica	63	53	9	848	686	194	0.0742925	0.0772595	0.0463918	0.0659812	-2.71839	-0.179362	0.00435352
6-3-3	Ajania tenuifolia	39	21	9	848	686	194	0.0459906	0.0306122	0.0463918	0.0409982	-3.19423	-0.130958	0.00168085
6-3-3	Thermopsis lupinoides				848	686	194	0	0	0	0		0	0
6-3-3	Artemisia capillaris	33	23	9	848	686	194	0.0389151	0.0335277	0.0463918	0.0396115	-3.22864	-0.127891	0.00156907
6-3-3	Kali collinum				848	686	194	0	0	0	0		0	0
6-3-3	Aster tataricus	6	5	2	848	686	194	0.00707547	0.00728863	0.0103093	0.00822446	-4.80064	-0.0394827	6.76417e-05
6-3-3	Bare area		9
4-1-1	Aster altaicus	16	22	6	227	262	79	0.0704846	0.0839695	0.0759494	0.0768011	-2.56654	-0.197113	0.00589841	2.94444	19	2.69087	0.913882	0.0707173	19	2.69348	0.916115	0.0704123	19	2.71008	0.921858	0.0684613
4-1-1	Leontopodium nanum				227	262	79	0	0	0	0		0	0
4-1-1	Artemisia argyi				227	262	79	0	0	0	0		0	0
4-1-1	Artemisia stechmanniana	8	10	3	227	262	79	0.0352423	0.0381679	0.0379747	0.0371283	-3.29338	-0.122277	0.00137851
4-1-1	Gentianopsis barbata				227	262	79	0	0	0	0		0	0
4-1-1	Agropyron cristatum	46	28	7	227	262	79	0.202643	0.10687	0.0886076	0.132707	-2.01961	-0.268017	0.0176111
4-1-1	Poa pratensis	6	7	5	227	262	79	0.0264317	0.0267176	0.0632911	0.0388135	-3.24899	-0.126104	0.00150649
4-1-1	Potentilla supina				227	262	79	0	0	0	0		0	0
4-1-1	Plantago asiatica	1	1	1	227	262	79	0.00440529	0.00381679	0.0126582	0.0069601	-4.96756	-0.0345747	4.8443e-05
4-1-1	Artemisia hedinii	5	7	6	227	262	79	0.0220264	0.0267176	0.0759494	0.0415645	-3.18051	-0.132196	0.0017276
4-1-1	Elymus nutans	8	2	2	227	262	79	0.0352423	0.00763359	0.0253165	0.0227308	-3.78404	-0.0860141	0.000516688
4-1-1	Cirsium arvense				227	262	79	0	0	0	0		0	0
4-1-1	Gentiana dahurica				227	262	79	0	0	0	0		0	0
4-1-1	Calystegia hederacea				227	262	79	0	0	0	0		0	0
4-1-1	Cirsium spicatum				227	262	79	0	0	0	0		0	0
4-1-1	Sanguisorba officinalis				227	262	79	0	0	0	0		0	0
4-1-1	Androsace umbellata				227	262	79	0	0	0	0		0	0
4-1-1	Cicuta virosa				227	262	79	0	0	0	0		0	0
4-1-1	Stipa breviflora				227	262	79	0	0	0	0		0	0
[truncated: 971 more rows]

## Sheet: β Diversity
Treatment	X	S	Quadrat β	Plot β	βw
CK-1-1	44	55	0.25	0.251725	0.250862		Artificial afforestation (year)	βw	Error	Significance
CK-1-2	42	55	0.309524
CK-1-3	46	55	0.195652				CK	0.2509	0.0349	d
CK-2-1	43	55	0.27907	0.250431			10	0.4504	0.0686	d
CK-2-2	45	55	0.222222				8	0.8438	0.148	c
CK-2-3	44	55	0.25				6	0.9751	0.152	c
CK-3-1	43	55	0.27907	0.250431			4	1.9202	0.2923	b
CK-3-2	45	55	0.222222				2	2.6998	0.3741	a
CK-3-3	44	55	0.25
10-1-1	42	55	0.309524	0.415853	0.450367
10-1-2	39	55	0.410256
10-1-3	36	55	0.527778
10-2-1	38	55	0.447368	0.487211
10-2-2	37	55	0.486486
10-2-3	36	55	0.527778
10-3-1	37	55	0.486486	0.448037
10-3-2	39	55	0.410256
10-3-3	38	55	0.447368
8-1-1	30	55	0.833333	0.845679	0.843836
8-1-2	27	55	1.03704
8-1-3	33	55	0.666667
8-2-1	32	55	0.71875	0.843327
8-2-2	27	55	1.03704
8-2-3	31	55	0.774194
8-3-1	33	55	0.666667	0.842501
8-3-2	29	55	0.896552
8-3-3	28	55	0.964286
6-1-1	28	55	0.964286	0.971001	0.975059
6-1-2	26	55	1.11538
6-1-3	30	55	0.833333
6-2-1	32	55	0.71875	0.983173
6-2-2	26	55	1.11538
6-2-3	26	55	1.11538
6-3-1	26	55	1.11538	0.971001
6-3-2	30	55	0.833333
6-3-3	28	55	0.964286
4-1-1	19	55	1.89474	1.91636	1.92018
4-1-2	17	55	2.23529
4-1-3	21	55	1.61905
4-2-1	19	55	1.89474	1.94408
4-2-2	16	55	2.4375
4-2-3	22	55	1.5
4-3-1	18	55	2.05556	1.9001
4-3-2	20	55	1.75
4-3-3	19	55	1.89474
2-1-1	15	55	2.66667	2.71091	2.6998
2-1-2	17	55	2.23529
2-1-3	13	55	3.23077
2-2-1	15	55	2.66667	2.67758
2-2-2	14	55	2.92857
2-2-3	16	55	2.4375
2-3-1	15	55	2.66667	2.71091
2-3-2	13	55	3.23077
2-3-3	17	55	2.23529

## Sheet: Biomass
Treatment	Aboveground biomass（g/m2）	Average aboveground biomass of sample plot（g/m2）	Average aboveground biomass of sample plot（g/m2）
CK-1-1	252.596	263.349	255.197		Artificial afforestation（year）	Biomass（g/m2）	Error	Significance
CK-1-2	264.1				CK	255.2	12.33	a
CK-1-3	273.35				10	215.28	17.12	b
CK-2-1	246.3	254.475			8	142.61	9.94	c
CK-2-2	268.225				6	119.81	10.88	d
CK-2-3	248.9				4	78.09	12.08	e
CK-3-1	260.9	247.767			2	53.54	9.38	f
CK-3-2	234.6
CK-3-3	247.8
10-1-1	210.682	200.902	215.281
10-1-2	200.625
10-1-3	191.4
10-2-1	220.625	222.733
10-2-2	214.775
10-2-3	232.8
10-3-1	204.725	222.208
10-3-2	213.625
10-3-3	248.275
8-1-1	143.59	145.972	142.607
8-1-2	151.125
8-1-3	143.2
8-2-1	138.575	141.392
8-2-2	127.4
8-2-3	158.2
8-3-1	149.125	140.458
8-3-2	143.2
8-3-3	129.05
6-1-1	120.853	117.017	119.814
6-1-2	110.075
6-1-3	120.125
6-2-1	122.8	118.617
6-2-2	131.4
6-2-3	101.65
6-3-1	113.4	123.808
6-3-2	138.175
6-3-3	119.85
4-1-1	77.1663	82.4221	78.0907
4-1-2	98.2
4-1-3	71.9
4-2-1	83.025	80.2667
4-2-2	63.65
4-2-3	94.125
4-3-1	72.1	71.5833
4-3-2	78.625
4-3-3	64.025
2-1-1	58.5267	51.8922	53.5391
2-1-2	46.975
2-1-3	50.175
2-2-1	63.4	62.6667
2-2-2	56.15
2-2-3	68.45
2-3-1	54.675	46.0583
2-3-2	38.65
2-3-3	44.85

## Sheet:  Similarity coefficient
Species	Treatment
	CK	10year	8year	6year	4year	2year
54	47	42	35	33	22	19
Aster altaicus	Aster altaicus	Aster altaicus	Aster altaicus	Aster altaicus	Aster altaicus	Aster altaicus	Statistical Table of Common Species in the Community
Leontopodium nanum	Leontopodium nanum	Leontopodium nanum	Leontopodium nanum	Leontopodium nanum				CK	10year	8year	6year	4year	2year
Artemisia argyi	Artemisia argyi	Artemisia argyi	Artemisia argyi	Artemisia argyi			CK
Artemisia stechmanniana	Artemisia stechmanniana	Artemisia stechmanniana	Artemisia stechmanniana	Artemisia stechmanniana	Artemisia stechmanniana	Artemisia stechmanniana	10year	38
Gentianopsis barbata	Gentianopsis barbata	Gentianopsis barbata	Gentianopsis barbata				8year	33	30
Agropyron cristatum	Agropyron cristatum	Agropyron cristatum	Agropyron cristatum	Agropyron cristatum	Agropyron cristatum	Agropyron cristatum	6year	30	28	26
Poa pratensis	Poa pratensis	Poa pratensis	Poa pratensis	Poa pratensis	Poa pratensis		4year	21	18	16	17
Potentilla supina	Potentilla supina	Potentilla supina	Potentilla supina	Potentilla supina			2year	16	15	14	14	13
Plantago asiatica	Plantago asiatica	Plantago asiatica	Plantago asiatica	Plantago asiatica	Plantago asiatica		Statistical table of community similarity coefficient
Artemisia hedinii	Artemisia hedinii	Artemisia hedinii	Artemisia hedinii	Artemisia hedinii	Artemisia hedinii	Artemisia hedinii		Number of species	47	42	35	33	22	19
Elymus nutans	Elymus nutans	Elymus nutans	Elymus nutans	Elymus nutans	Elymus nutans		Number of species	Treatment	CK	10year	8year	6year	4year	2year
Cirsium arvense	Cirsium arvense	Cirsium arvense	Cirsium arvense	Cirsium arvense	Cirsium arvense	Cirsium arvense	47	CK	1
Gentiana dahurica	Gentiana dahurica	Gentiana dahurica					42	10year	0.745098	1
Calystegia hederacea		Calystegia hederacea	Calystegia hederacea	Calystegia hederacea		Calystegia hederacea	35	8year	0.673469	0.638298	1
Cirsium spicatum	Cirsium spicatum	Cirsium spicatum	Cirsium spicatum	Cirsium spicatum			33	6year	0.6	0.595745	0.619048	1
Sanguisorba officinalis	Sanguisorba officinalis	Sanguisorba officinalis	Sanguisorba officinalis	Sanguisorba officinalis			22	4year	0.4375	0.391304	0.390244	0.447368	1
Androsace umbellata	Androsace umbellata	Androsace umbellata		Androsace umbellata			19	2year	0.32	0.326087	0.35	0.368421	0.464286	1
Cicuta virosa		Cicuta virosa
Stipa breviflora	Stipa breviflora	Stipa breviflora	Stipa breviflora	Stipa breviflora
Carduus nutans	Carduus nutans	Carduus nutans
Oxytropis kansuensis	Oxytropis kansuensis	Oxytropis kansuensis	Oxytropis kansuensis	Oxytropis kansuensis	Oxytropis kansuensis
Tibetia himalaica		Tibetia himalaica
Festuca elata	Festuca elata	Festuca elata			Festuca elata
Medicago ruthenica	Medicago ruthenica	Medicago ruthenica	Medicago ruthenica	Medicago ruthenica	Medicago ruthenica	Medicago ruthenica
Scutellaria baicalensis		Scutellaria baicalensis
Neotrinia splendens	Neotrinia splendens	Neotrinia splendens	Neotrinia splendens		Neotrinia splendens	Neotrinia splendens
Ligularia sagitta	Ligularia sagitta	Ligularia sagitta
Nepeta cataria	Nepeta cataria	Nepeta cataria	Nepeta cataria		Nepeta cataria
Dysphania schraderiana	Dysphania schraderiana	Dysphania schraderiana
Potentilla sericea	Potentilla sericea	Potentilla sericea	Potentilla sericea	Potentilla sericea
Ixeris polycephala	Ixeris polycephala	Ixeris polycephala			Ixeris polycephala	Ixeris polycephala
Stellera chamaejasme				Stellera chamaejasme	Stellera chamaejasme	Stellera chamaejasme
Geranium wilfordii	Geranium wilfordii	Geranium wilfordii	Geranium wilfordii	Geranium wilfordii
Gentiana scabra	Gentiana scabra			Gentiana scabra
Gymnaconitum gymnandrum	Gymnaconitum gymnandrum		Gymnaconitum gymnandrum
Gentiana straminea	Gentiana straminea		Gentiana straminea
Iris lactea	Iris lactea				Iris lactea
Pedicularis sylvatica	Pedicularis sylvatica	Pedicularis sylvatica		Pedicularis sylvatica	Pedicularis sylvatica	Pedicularis sylvatica
Saussurea pulchra	Saussurea pulchra	Saussurea pulchra	Saussurea pulchra	Saussurea pulchra		Saussurea pulchra
Allium mongolicum	Allium mongolicum	Allium mongolicum	Allium mongolicum	Allium mongolicum
Elsholtzia densa	Elsholtzia densa	Elsholtzia densa				Elsholtzia densa
Taraxacum mongolicum	Taraxacum mongolicum		Taraxacum mongolicum	Taraxacum mongolicum	Taraxacum mongolicum	Taraxacum mongolicum
Lancea tibetica	Lancea tibetica		Lancea tibetica
Anaphalis lactea	Anaphalis lactea			Anaphalis lactea	Anaphalis lactea
Euphorbia esula	Euphorbia esula
Carex myosuroides	Carex myosuroides	Carex myosuroides	Carex myosuroides	Carex myosuroides
Daphne tangutica				Daphne tangutica
Clematis florida	Clematis florida		Clematis florida			Clematis florida
Knorringia sibirica	Knorringia sibirica	Knorringia sibirica	Knorringia sibirica	Knorringia sibirica	Knorringia sibirica
Ajania tenuifolia	Ajania tenuifolia	Ajania tenuifolia	Ajania tenuifolia	Ajania tenuifolia	Ajania tenuifolia	Ajania tenuifolia
Thermopsis lupinoides	Thermopsis lupinoides	Thermopsis lupinoides	Thermopsis lupinoides
Artemisia capillaris	Artemisia capillaris	Artemisia capillaris	Artemisia capillaris	Artemisia capillaris	Artemisia capillaris	Artemisia capillaris
Kali collinum			Kali collinum			Kali collinum
Aster tataricus	Aster tataricus	Aster tataricus		Aster tataricus		Aster tataricus
